# Supplementary material for: Synthesis, characterization, and structure determination of bis-oxazolidine complexes of rhenium
Source: Royal Society of Chemistry journal article supplement (doi:10.1039/d3nj02181e), 2023-01-01
Supplement: d3nj02181e1.pdf [file d3nj02181e1.pdf]

## Supporting Information for

# Synthesis, Characterization, and Structure Determination of Bis-oxazolidine Complexes of Rhenium.

Ryan A. Pohorenc, William W. Brennessel, William D. Jones\*

Department of Chemistry, University of Rochester, Rochester, NY 14627.

|                                                                                                                                                                                                                                                            |    |
|------------------------------------------------------------------------------------------------------------------------------------------------------------------------------------------------------------------------------------------------------------|----|
| <b>Figures S1-S7.</b> $^1\text{H}$ and $^{13}\text{C}\{^1\text{H}\}$ NMR spectra of $\text{L1}^{\text{rac}}$ , $\text{L2}^{\text{rac}}$ , $\text{L3}^{\text{rac}}$ , $\text{L1}^{\text{meso}}$ , $\text{L2}^{\text{meso}}$ , and $\text{L3}^{\text{meso}}$ | 2  |
| <b>Figures S8.</b> $^{13}\text{C}\{^1\text{H}\}$ NMR spectrum of $\text{Re}(\text{CO})_5\text{Br}$                                                                                                                                                         | 5  |
| <b>Figures S9-S10.</b> $^1\text{H}$ and $^{13}\text{C}\{^1\text{H}\}$ NMR spectra of <i>fac</i> - $[\text{Re}(\text{L1}^{\text{meso}})(\text{CO})_3]\text{Br}$ ( <b>8</b> )                                                                                | 6  |
| <b>Figures S11-S12.</b> HSQC and COSY NMR spectra of <i>fac</i> - $[\text{Re}(\text{L1}^{\text{meso}})(\text{CO})_3]\text{Br}$ ( <b>8</b> )                                                                                                                | 7  |
| <b>Figure S-13.</b> ESI-MS spectrum of <i>fac</i> - $[\text{Re}(\text{L1}^{\text{meso}})(\text{CO})_3]\text{Br}$ ( <b>8</b> )                                                                                                                              | 8  |
| <b>Figures S14-S15.</b> $^1\text{H}$ and $^{13}\text{C}\{^1\text{H}\}$ NMR spectra of <i>fac</i> - $\text{Re}(\text{L1}^{\text{meso-H}})(\text{CO})_3$ ( <b>10</b> )                                                                                       | 9  |
| <b>Figures S16-S17.</b> $^1\text{H}$ - $^{13}\text{C}$ HSQC and COSY spectra of <i>fac</i> - $\text{Re}(\text{L1}^{\text{meso-H}})(\text{CO})_3$ ( <b>10</b> )                                                                                             | 10 |
| <b>Figures S18.</b> $^{13}\text{C}\{^1\text{H}\}$ NMR spectrum of $[\text{Re}(\text{CO})_4\text{Br}(\text{MeCN})]$                                                                                                                                         | 11 |
| <b>Figures S19.</b> $^1\text{H}$ NMR spectrum of product mixture of <b>10</b> and $\text{PPh}_3$                                                                                                                                                           | 11 |
| <b>Figures S20-21.</b> Cyclic voltammograms of <b>8</b> and <b>10</b>                                                                                                                                                                                      | 12 |
| <b>Figures S22-23.</b> GC chromatograms for electrolysis of <b>10</b> with $\text{CO}_2$                                                                                                                                                                   | 14 |
| X-ray data for $[(\kappa^3\text{-L1}^{\text{meso}})\text{Re}(\text{CO})_3][\text{Br}]$ ( <b>8</b> )                                                                                                                                                        | 16 |
| X-ray data for $(\kappa^3\text{-}N,N',O\text{-L1}^{\text{meso-H}})\text{Re}(\text{CO})_3$ thf ( <b>10</b> )                                                                                                                                                | 38 |
| X-ray data for $(\kappa^3\text{-}N,N',O\text{-L1}^{\text{meso-H}})\text{Re}(\text{CO})_3$ thf ( <b>10</b> ), second polymorph                                                                                                                              | 54 |

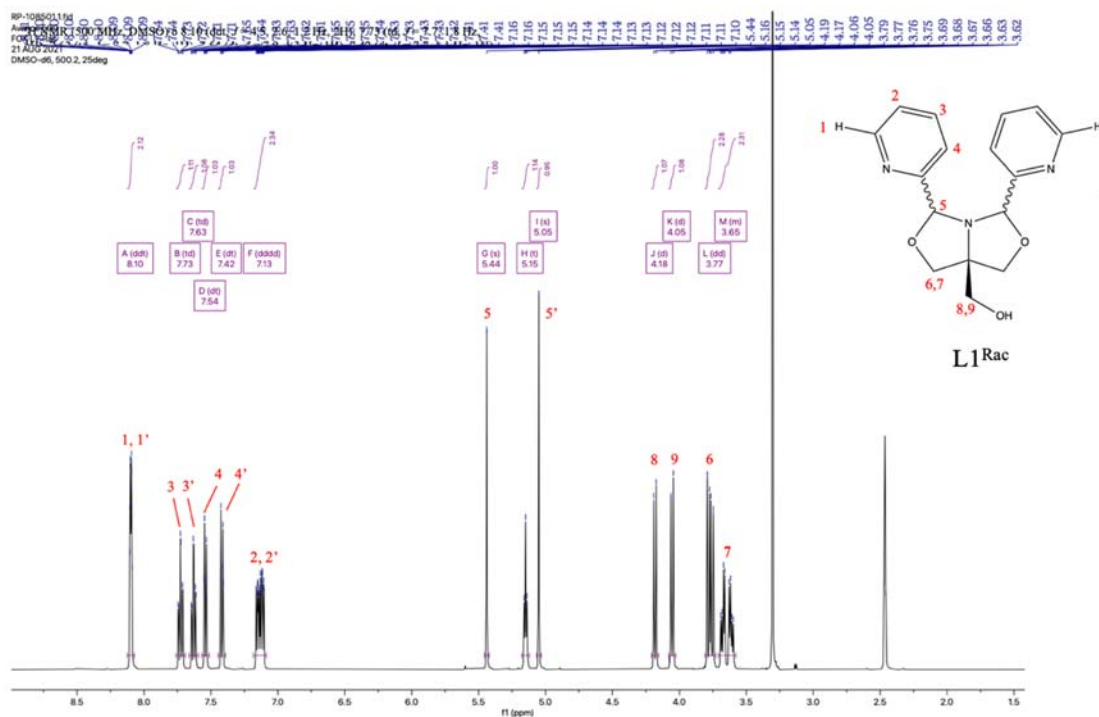

Figure S-1. <sup>1</sup>H NMR (500 MHz, DMSO-*d*<sub>6</sub>) spectrum of **L1<sup>rac</sup>**.

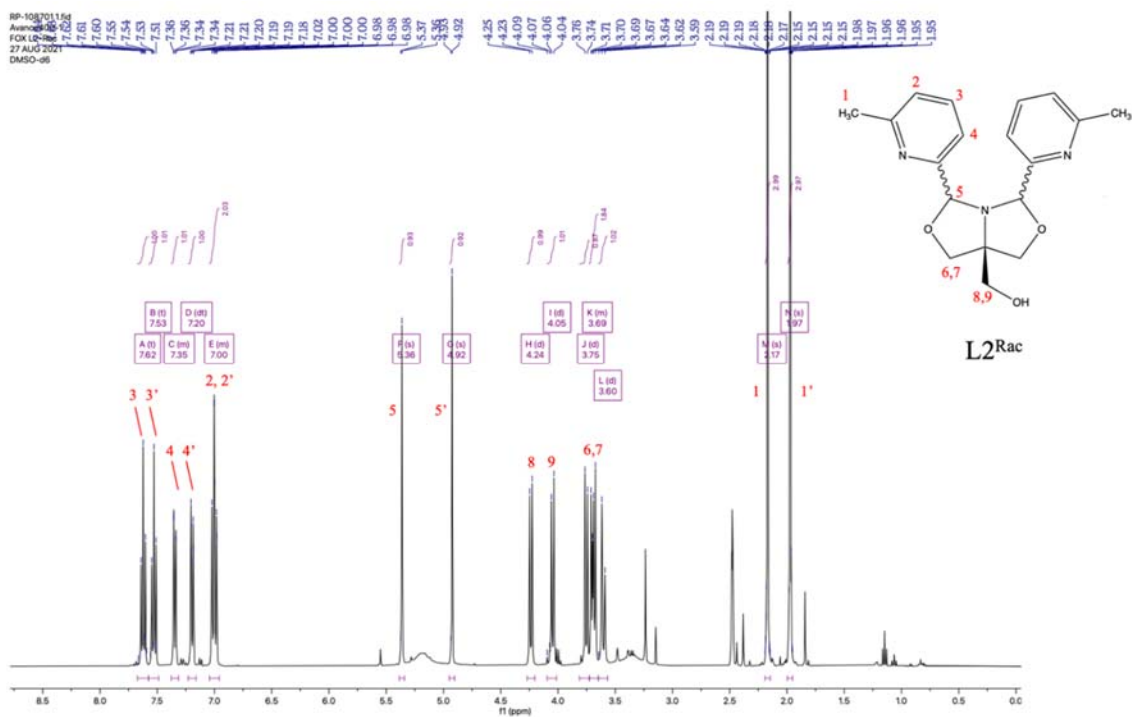

Figure S-2. <sup>1</sup>H NMR (400 MHz, DMSO-*d*<sub>6</sub>) spectrum of **L2<sup>rac</sup>**.

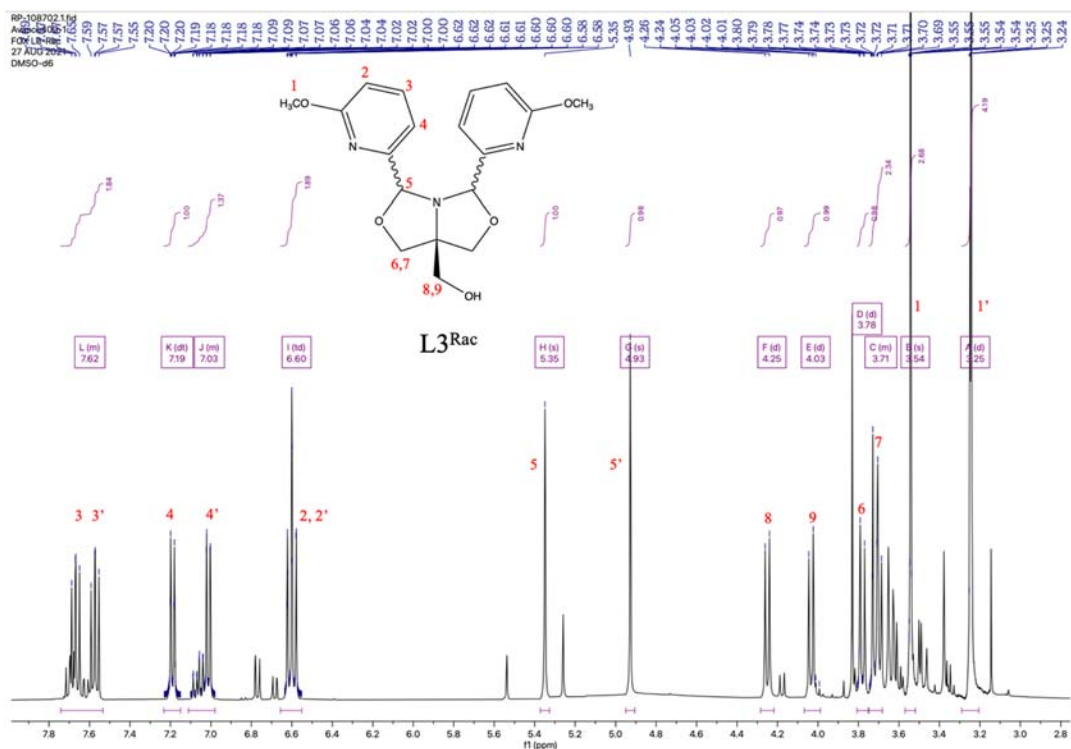

Figure S-3.  $^1\text{H}$  NMR (400 MHz,  $\text{DMSO-}d_6$ ) spectrum of **L3<sup>rac</sup>**.

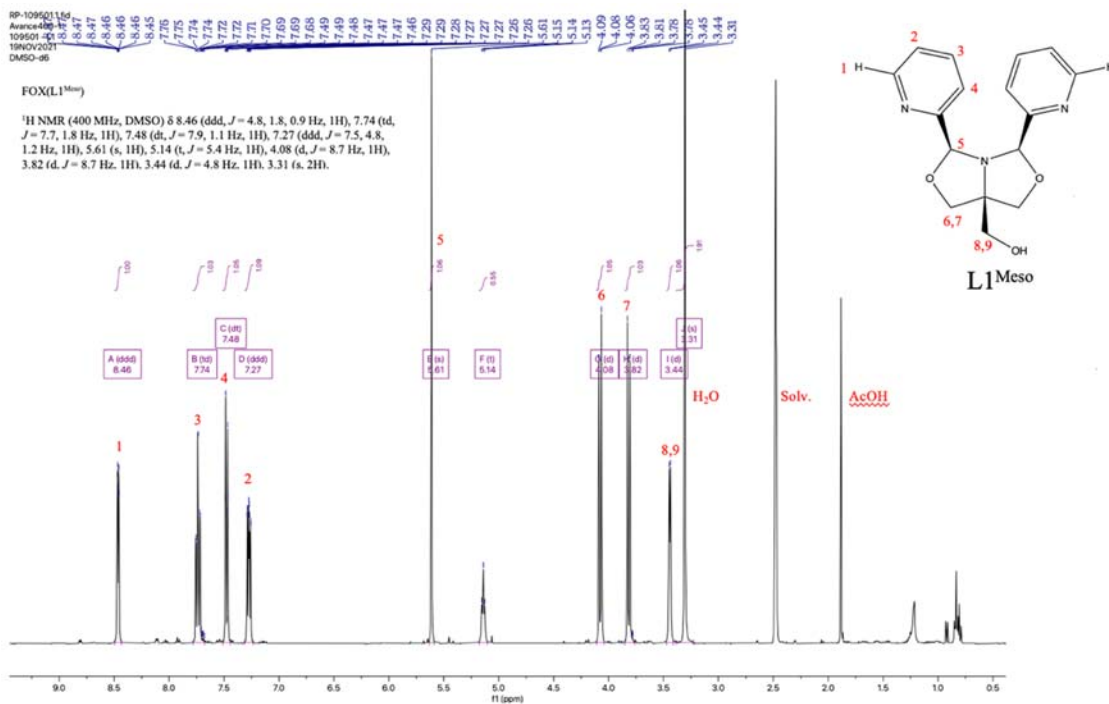

Figure S-4.  $^1\text{H}$  NMR (400 MHz,  $\text{DMSO-}d_6$ ) spectrum of **L1<sup>meso</sup>**.

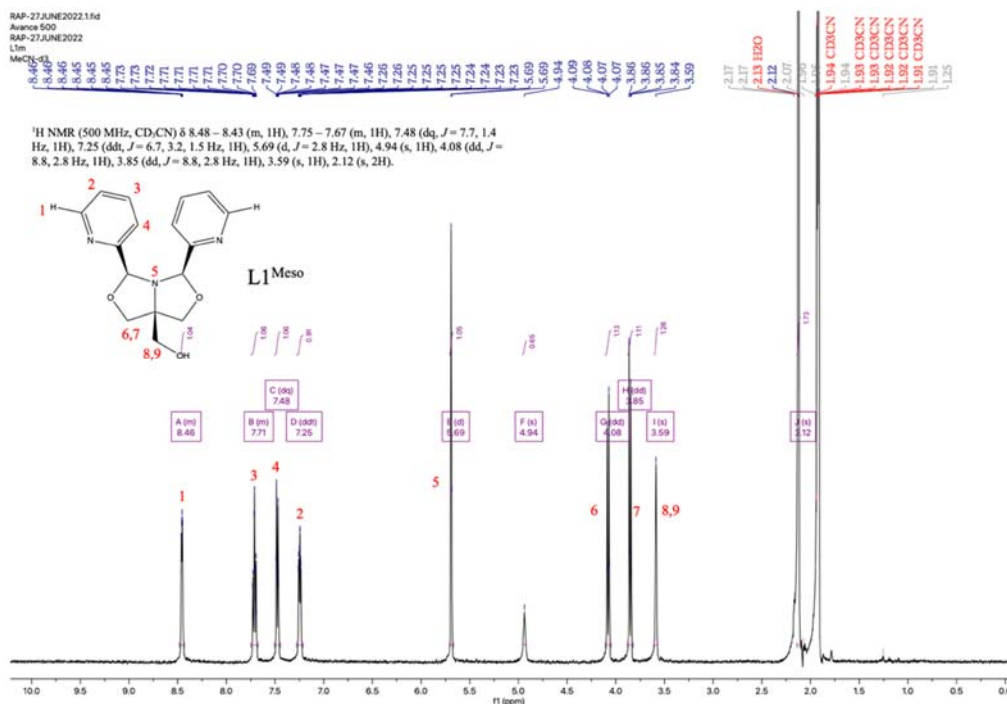

Figure S-5. <sup>1</sup>H NMR (500 MHz, MeCN-*d*<sub>3</sub>) spectrum of L1<sup>meso</sup>.

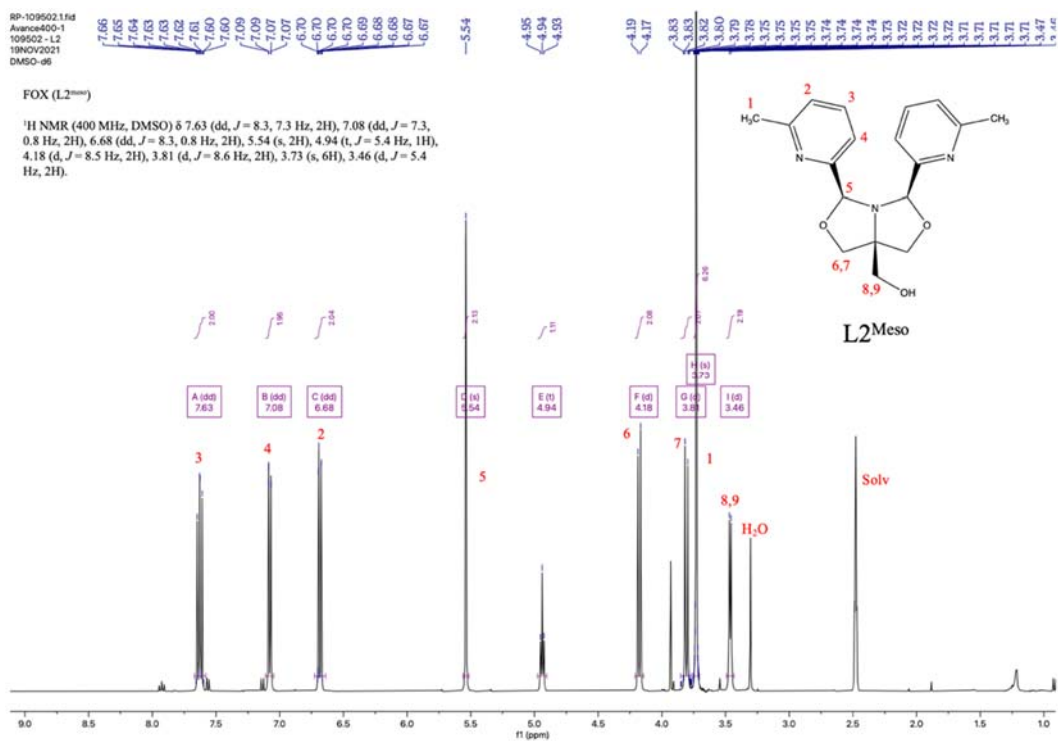

Figure S-6. <sup>1</sup>H NMR (500 MHz, DMSO-*d*<sub>6</sub>) spectrum of L2<sup>meso</sup>.

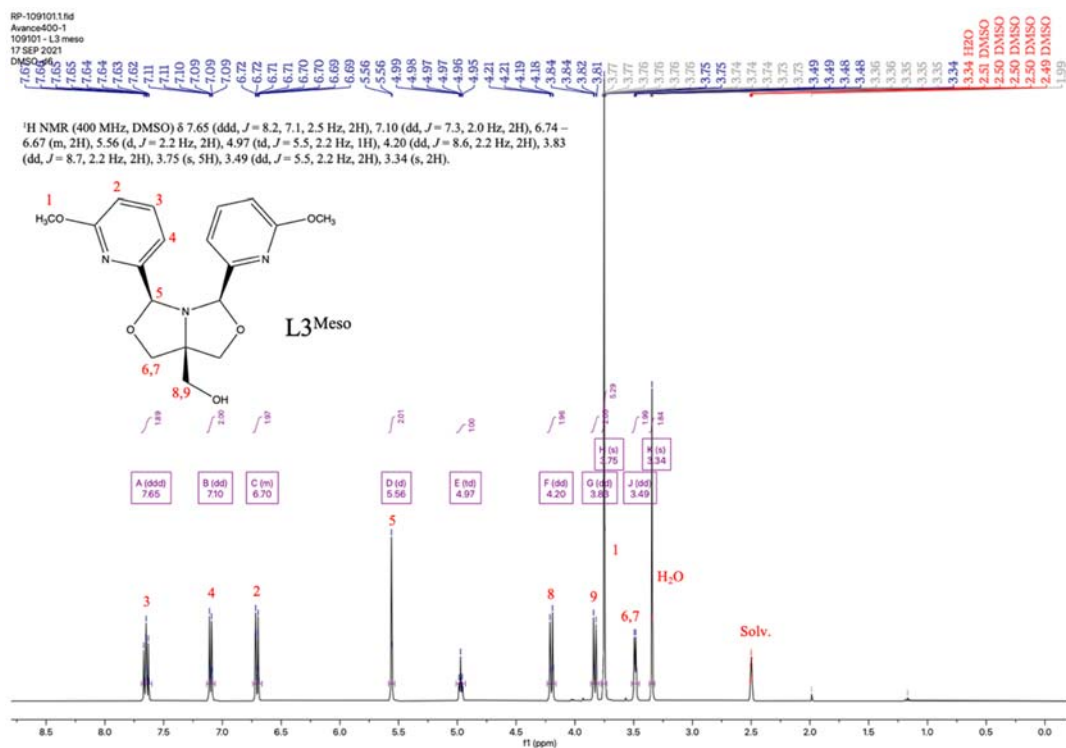

Figure S-7. <sup>1</sup>H NMR (400 MHz, DMSO-*d*<sub>6</sub>) spectrum of L3<sup>meso</sup>.

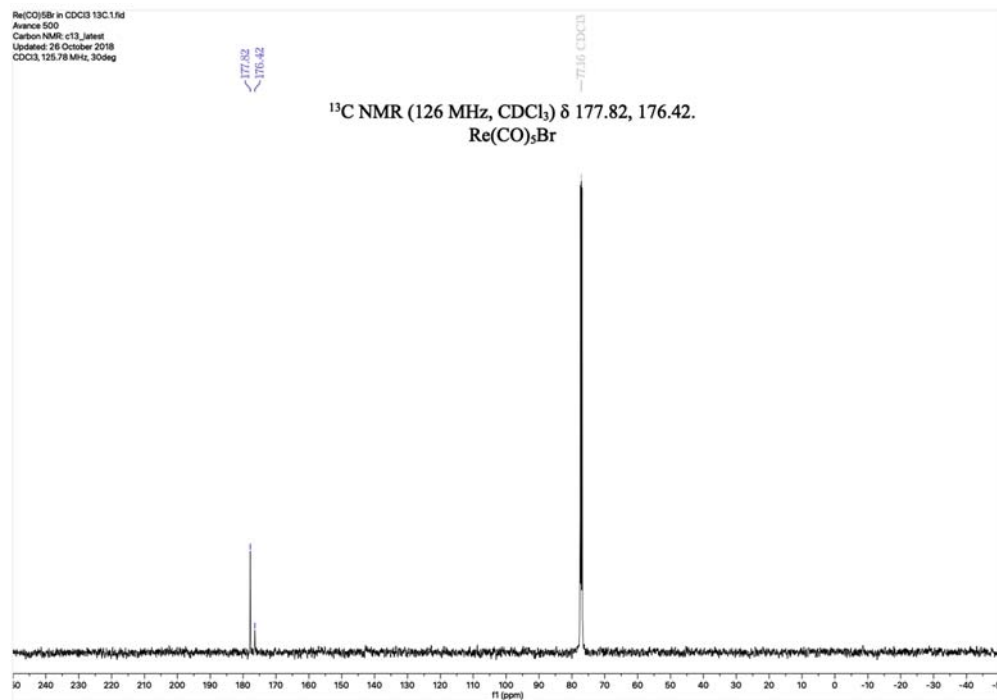

Figure S-8. <sup>13</sup>C NMR (126 MHz, CDCl<sub>3</sub>) spectrum of Re(CO)<sub>5</sub>Br.

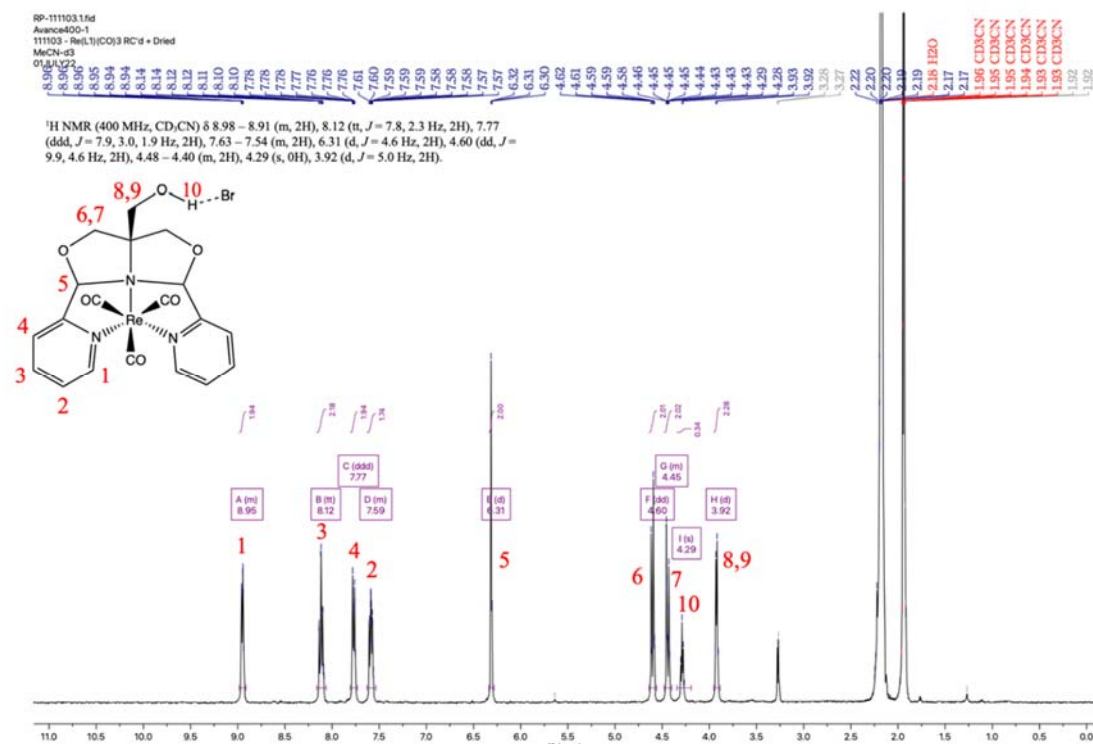

Figure S-9. <sup>1</sup>H NMR (500 MHz, MeCN-*d*<sub>3</sub>) spectrum of *fac*-[Re(L1<sup>meso</sup>)(CO)<sub>3</sub>]Br (**8**).

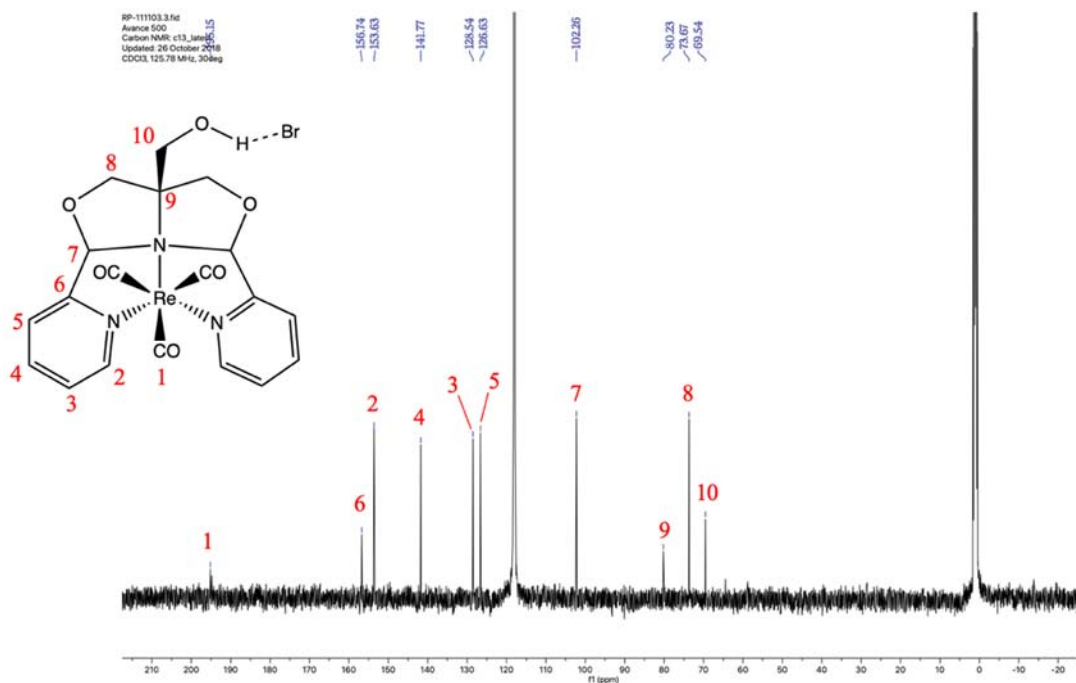

Figure S-10. <sup>13</sup>C NMR (126 MHz, MeCN-*d*<sub>3</sub>) spectrum of *fac*-[Re(L1<sup>meso</sup>)(CO)<sub>3</sub>]Br (**8**).

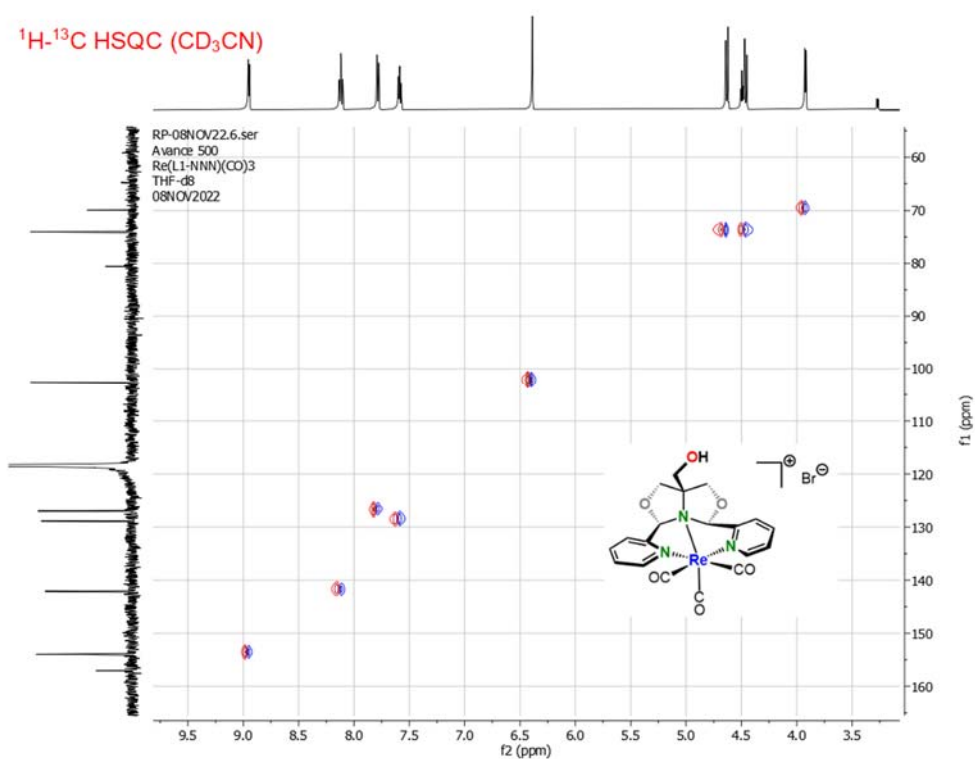

Figure S-11. <sup>1</sup>H-<sup>13</sup>C HSQC (500 MHz, THF-*d*<sub>8</sub>) spectrum of *fac*-[Re(L1<sup>meso</sup>)(CO)<sub>3</sub>]Br (**8**).

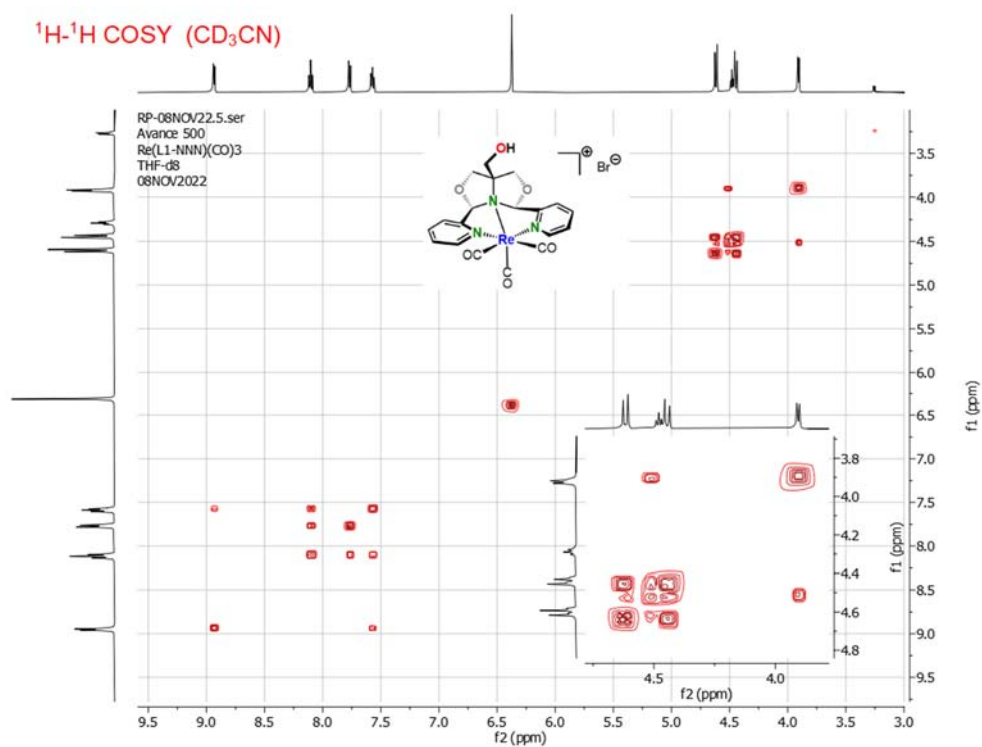

Figure S-12. COSY (500 MHz, THF-*d*<sub>8</sub>) spectrum of *fac*-[Re(L1<sup>meso</sup>)(CO)<sub>3</sub>]Br (**8**).

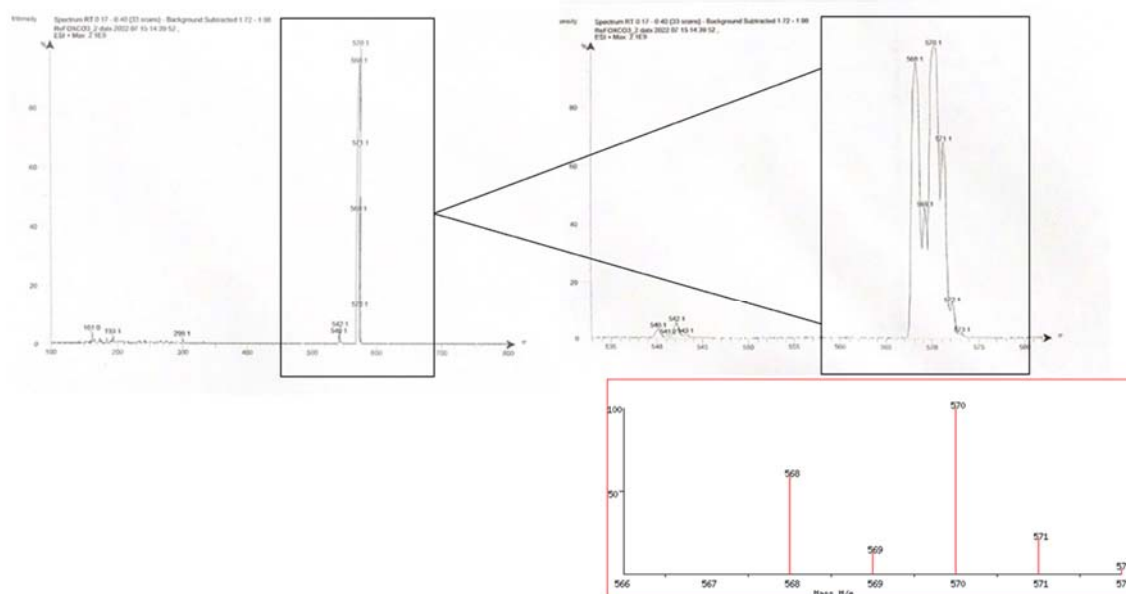

**Figure S-13.** ESI-MS spectrum of *fac*-[Re(L1<sup>meso</sup>)(CO)<sub>3</sub>]Br (**8**) (positive ion mode). A simulated spectrum is shown in red. Exact mass ( $M^+$ ) = 569.56. Observed: 568.1 ( $M^+ - H^+$ ), 569.1 ( $M^+$ ), 570.1 ( $M^+ + 1$ ), 568.1 ( $M^+ + 2$ ).



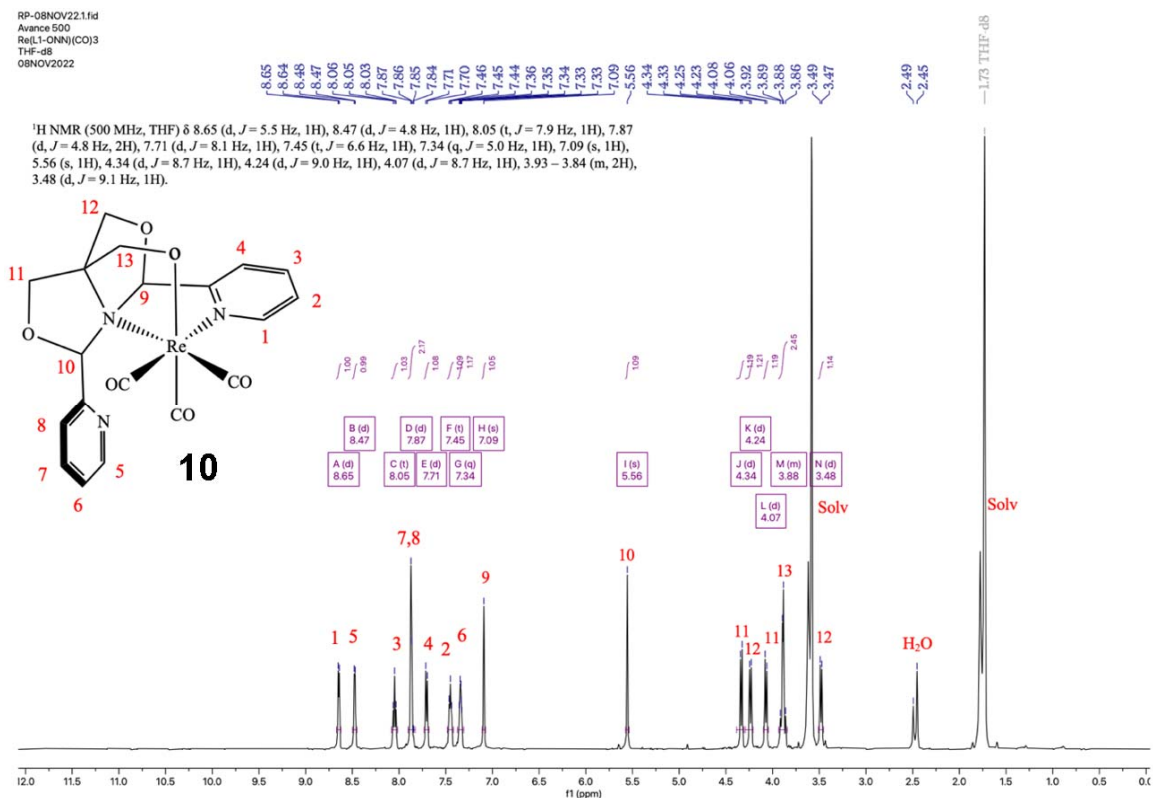

Figure S-14.  $^1\text{H NMR}$  (500 MHz, THF- $d_8$ ) spectrum of *fac*-Re(L1<sup>meso-H</sup>)(CO)<sub>3</sub> (**10**).

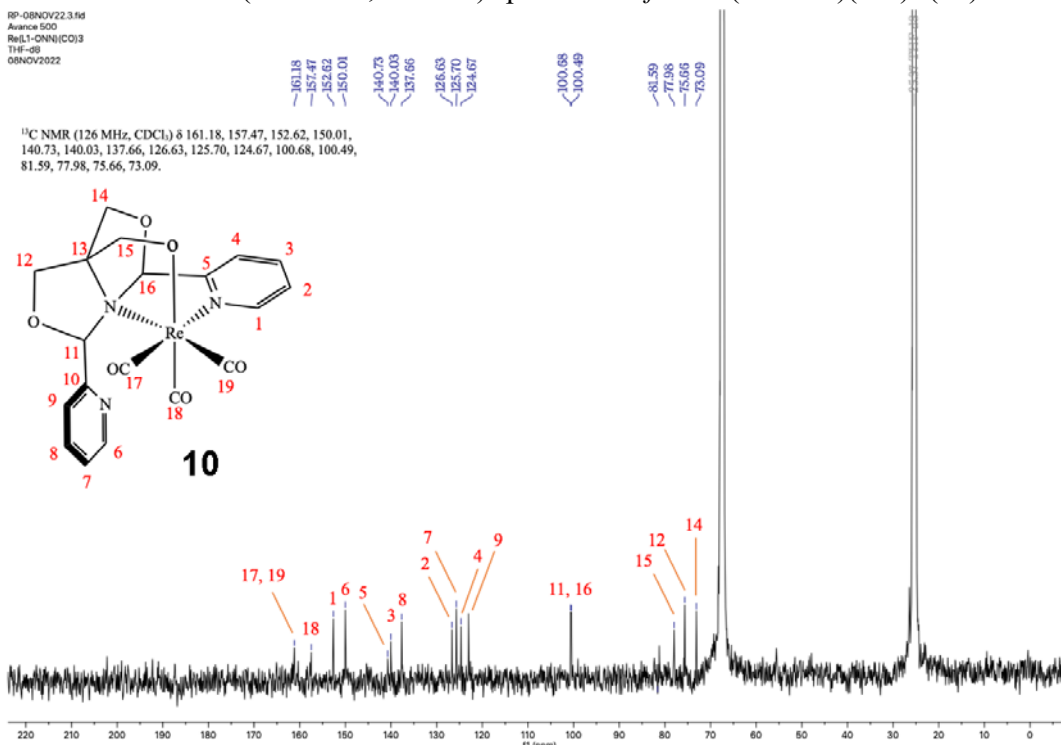

Figure S-15.  $^{13}\text{C NMR}$  (126 MHz, THF- $d_8$ ) spectrum of *fac*-Re(L1<sup>meso-H</sup>)(CO)<sub>3</sub> (**10**).

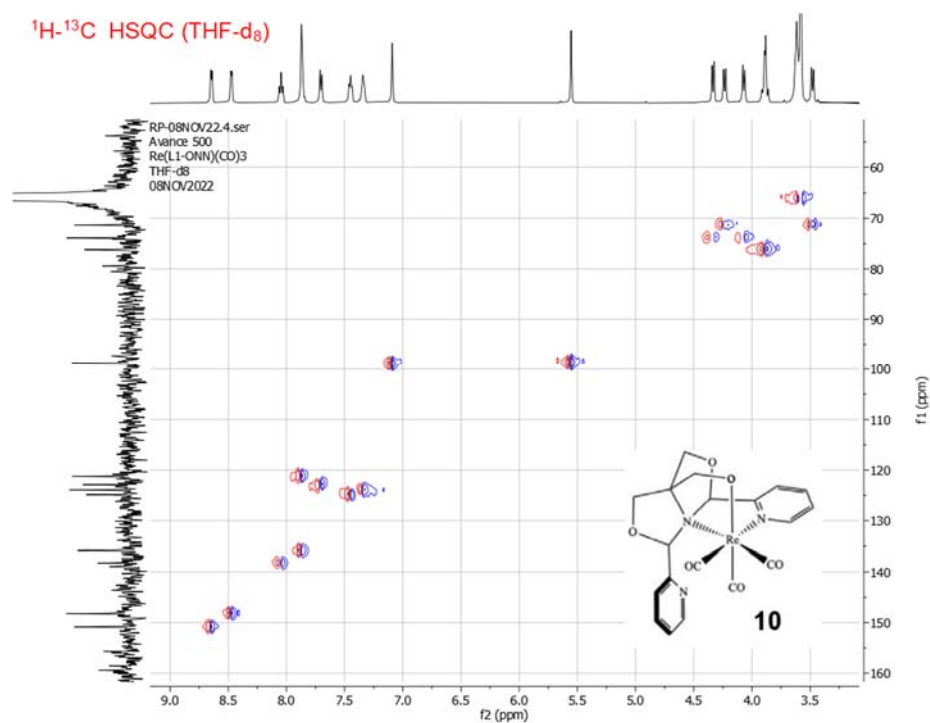

Figure S-16. <sup>1</sup>H-<sup>13</sup>C HSQC (500 MHz, THF-d<sub>8</sub>) spectrum of *fac*-Re(L1<sup>meso</sup>-H)(CO)<sub>3</sub> (**10**).

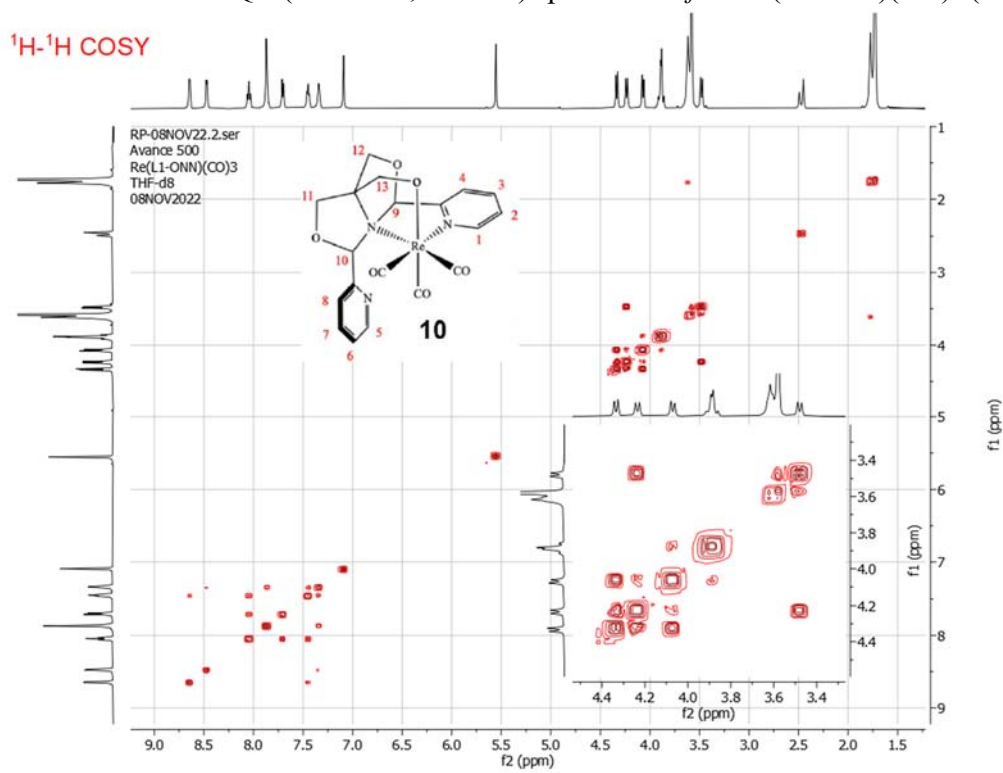

Figure S-17. COSY (500 MHz, THF-d<sub>8</sub>) spectrum of *fac*-Re(L1<sup>meso</sup>-H)(CO)<sub>3</sub> (**10**).

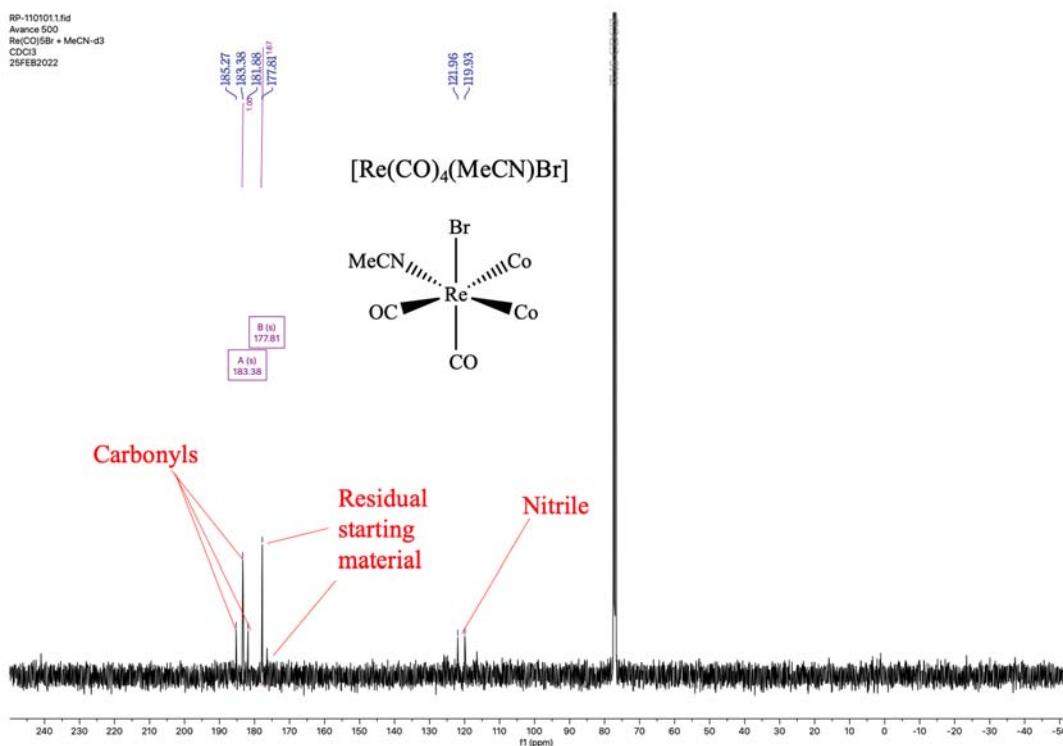

Figure S-19. <sup>13</sup>C NMR (126 MHz, CDCl<sub>3</sub>) spectrum of [Re(CO)<sub>4</sub>Br(MeCN)].

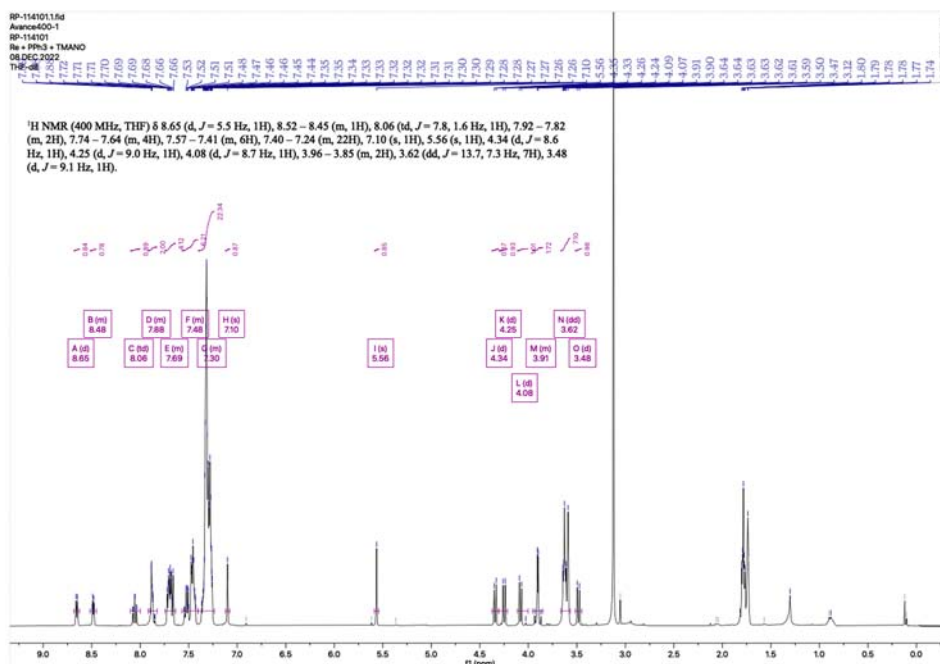

Figure S-20. <sup>1</sup>H NMR (400 MHz, THF-*d*<sub>8</sub>) spectrum of product mixture of **10** and PPh<sub>3</sub>. No reaction was observed. The spectrum is consistent with **10** and free PPh<sub>3</sub>.

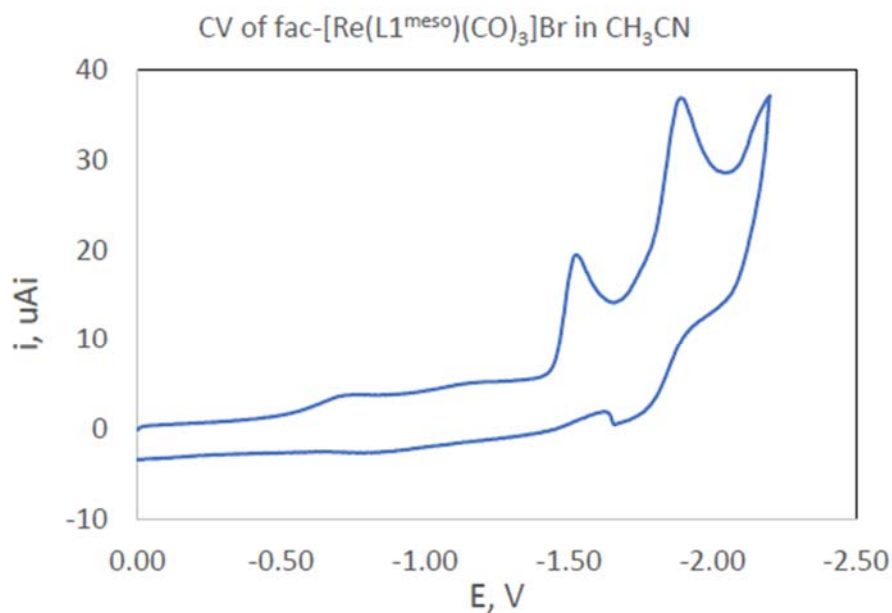

Experiment Type : Cyclic Voltammetry (CV)  
 Title : CV Run for BASI-Epsilon  
 Data File Name : 218906  
 Date & Time of the run : 6/19/2023 1:09:10 PM

Display Convention : POLAROGRAPHIC  
 Number of data points : 4400  
 # of points to skip : 0  
 Initial Potential : 0 (mV)  
 Switching Potential 1 : -2200 (mV)  
 Switching Potential 2 : 0 (mV)  
 Final Potential : 0 (mV)  
 Number of segments : 2  
 Scan rate : 200 (mV/s)  
 Current Full Scale : 100 uA  
 Filter : 10 Hz  
 Quiet Time : 2 (Sec)  
 Sample Interval : 1 mV

Analyst : wdj  
 Solution :

Analyte : Re-8  
 Analyte Conc. : 1mM  
 Solvent : CH<sub>3</sub>CN  
 Supporting Electrolyte : TBAH  
 S.E. Conc. : 0.1M  
 pH :  
 Temperature :  
 Electrodes :  
 -----  
 W.E. material : glassy carbon  
 W. E. area :  
 W. E. geometry : round  
 W. E. radius : 1.5mm  
 W. E. conditioning :  
 Reference electrode : Ag wire  
 Auxiliary electrode : Pt wire  
 Notes :  
 CH<sub>3</sub>CN dried over sieves in air  
 polish electrode -  
 100uA

**Figures S20.** Cyclic voltammogram of **8**.

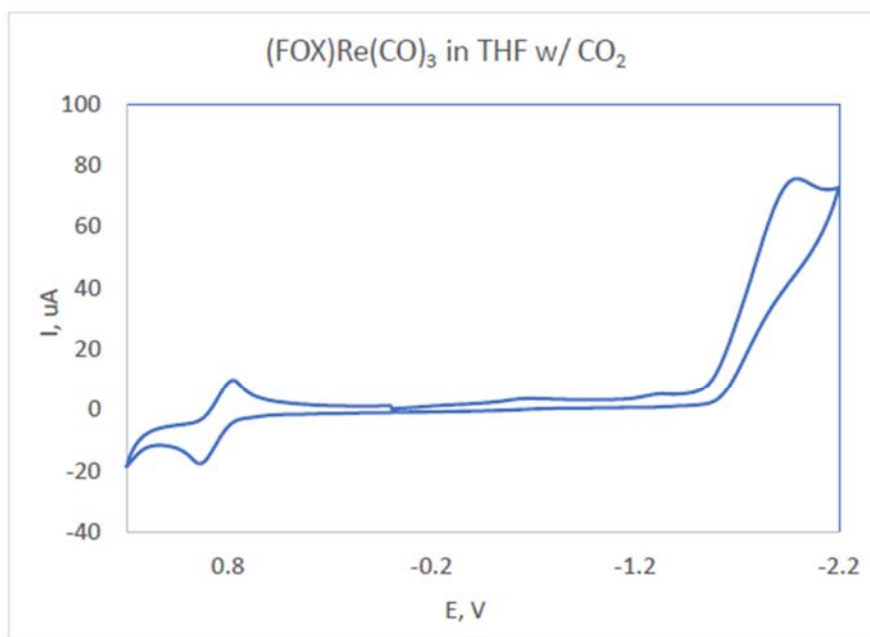

Epc= -1.874    Ipc= 4.92E-05    49.19  
 E(Fc) = 0.858    (correct values by -0.858 V to set Fc = 0)  
 Experiment Type : Cyclic Voltammetry (CV)  
 Title : CV Run for BASI-Epsilon  
 Data File Name : 218936  
 Date & Time of the run : 6/20/2023 10:58:32 AM  
 Display Convention : POLAROGRAPHIC  
 Number of data points : 7000  
 # of points to skip : 0  
 Initial Potential : 0 (mV)  
 Switching Potential 1 : -2200 (mV)  
 Switching Potential 2 : 1300 (mV)  
 Final Potential : 0 (mV)  
 Number of segments : 3  
 Scan rate : 100 (mV/s)  
 Current Full Scale : 100 uA  
 Filter : 10 Hz  
 Quiet Time : 2 (Sec)  
 Sample Interval : 1 mV  
 Analyst : wdj  
 Solution :  
 -----

Analyte : Re-B  
 Analyte Conc. : 1.2mM  
 Solvent : THF  
 Supporting Electrolyte : TBAH  
 S.E. Conc. : 0.1M  
 pH :  
 Temperature :  
 Electrodes :  
 -----  
 W.E. material : glassy carbon  
 W. E. area :  
 W. E. geometry : round  
 W. E. radius : 1.5mm  
 W. E. conditioning :  
 Reference electrode : Ag wire  
 Auxiliary electrode : Pt wire  
 Notes :  
 THF dried over sieves in air  
 polish electrode -  
 100uA  
 Ar  
 Re-B  
 w/ CO2  
 w/Fc  
 100mV/s

**Figures S21.** Cyclic voltammogram of **10** with CO<sub>2</sub> and ferrocene.



# Analysis Report

## &lt;Sample Information&gt;

Sample Name : wdj-219313  
 Sample ID : wdj-219313  
 Data Filename : 219313-TCD.gcd  
 Method Filename : tcd2.gcm  
 Batch Filename :  
 Vial # : 1  
 Injection Volume : 100 uL  
 Date Acquired : 8/1/2023 4:01:42 PM  
 Date Processed : 8/1/2023 4:10:58 PM

## Standard Gas Sample:

20 mL CO + 20 mL CH<sub>4</sub> + 500 mL CO<sub>2</sub>  
 Inject 100 uL

Sample Type : Standard

Acquired by : wdjgroup

Processed by : wdjgroup

## &lt;Chromatogram&gt;

uV

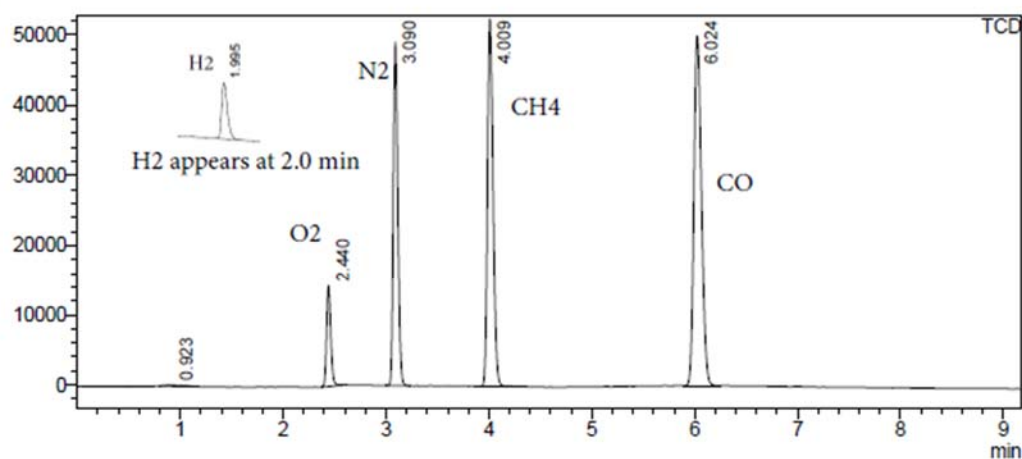

## &lt;Peak Table&gt;

TCD

| Peak# | Ret. Time | Area   | Height | Conc. | Unit | Mark | Name    |
|-------|-----------|--------|--------|-------|------|------|---------|
| 1     | 0.923     | 2091   | 150    | 0.000 |      |      |         |
| 2     | 2.440     | 40731  | 14342  | 0.000 |      |      |         |
| 3     | 3.090     | 149673 | 48728  | 0.000 |      |      |         |
| 4     | 4.009     | 198481 | 52270  | 0.000 |      |      | methane |
| 5     | 6.024     | 254420 | 49891  | 0.000 |      |      | CO      |
| Total |           | 645397 | 165381 |       |      |      |         |

## Response Factor Calculation:

$$\begin{aligned}
 \text{RF} &= (\text{moles CH}_4)/(\text{moles CO})(\text{area CH}_4)/(\text{area CO}) \\
 &= 1 \times (198481)/(254420) \\
 &= 0.780
 \end{aligned}$$

repeated in triplicate - all gave RF = 0.780

**Figure S22.** GC chromatograms for electrolysis of **10** with CO<sub>2</sub> – standard.



## <Sample Information>

Sample Name : wdj-219310  
 Sample ID : wdj-219310  
 Data Filename : 219310-TCD.gcd  
 Method Filename : tcd2.gcm  
 Batch Filename :  
 Vial # : 1  
 Injection Volume : 100 uL  
 Date Acquired : 8/1/2023 3:28:26 PM  
 Date Processed : 8/1/2023 3:36:46 PM

Sample of headspace - 200 uL methane added  
100 uL injection

Sample Type : CPE sample

Acquired by : wdjgroup  
 Processed by : wdjgroup

## <Chromatogram>

uV

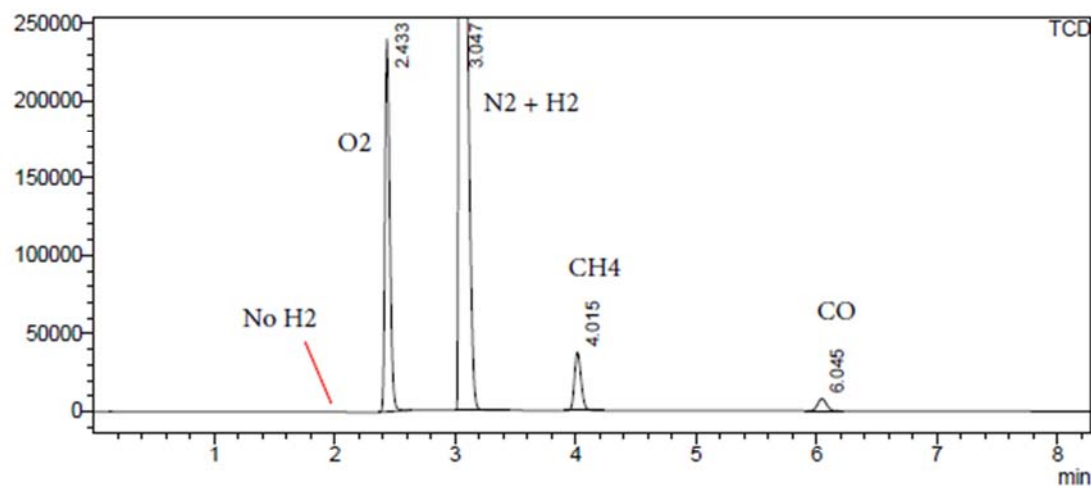

## <Peak Table>

| Peak# | Ret. Time | Area    | Height | Conc. | Unit | Mark | Name |
|-------|-----------|---------|--------|-------|------|------|------|
| 1     | 2.433     | 659888  | 238801 | 0.000 |      |      |      |
| 2     | 3.047     | 2694462 | 662808 | 0.000 |      |      |      |
| 3     | 4.015     | 141448  | 37378  | 0.000 |      | S    |      |
| 4     | 6.045     | 39833   | 7861   | 0.000 |      |      |      |
| Total |           | 3535631 | 946847 |       |      |      |      |

moles methane added =  $PV/RT = (1 \text{ atm})(0.000200 \text{ L})/(0.08205)/(300 \text{ K}) = 8.13 \text{ E-6 moles}$

moles CO = (RF)(moles CH<sub>4</sub>)(area CO)/(area CH<sub>4</sub>)

= (0.780)(8.13E-6)(39833)/(141448) = 1.79 E-6 moles CO

moles Re = 3.5 mg/641 = 5.5 E-6 mol

yield = (1.79E-6)/(5.5E-6) = 32%

3.59 Coulombs passed

=> Faradaic efficiency = (1.79E-6)/(3.59/96500)(2 mole e-/mole CO)=9.6%

**Figure S23.** GC chromatograms for electrolysis of **10** with CO<sub>2</sub> – sample.

REFERENCE NUMBER: jonrap04

## CRYSTAL STRUCTURE REPORT

C<sub>19</sub> H<sub>17</sub> Br N<sub>3</sub> O<sub>6</sub> Re

or

[( $\kappa^3$ -L1<sup>meso</sup>)Re(CO)<sub>3</sub>][Br]**(8)**

Report prepared for:

R. Pohorenc, Prof. W. Jones

November 28, 2021

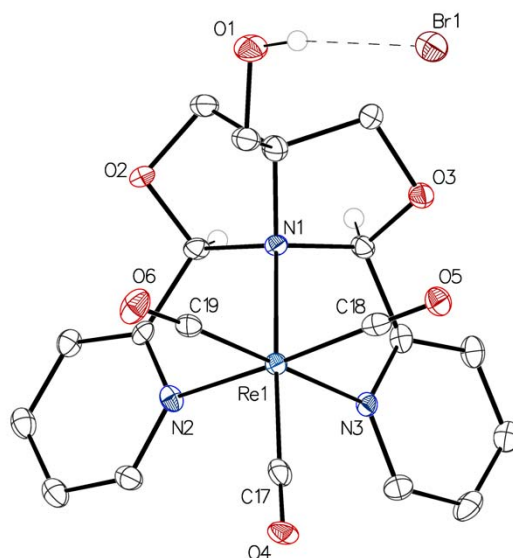

William W. Brennessel

X-ray Crystallographic Facility

Department of Chemistry, University of Rochester

120 Trustee Road

Rochester, NY 14627



### Data collection

A crystal (0.121 x 0.053 x 0.018 mm<sup>3</sup>) was placed onto a thin glass optical fiber or a nylon loop and mounted on a Rigaku XtaLAB Synergy-S Dualflex diffractometer equipped with a HyPix-6000HE HPC area detector for data collection at 100.00(10) K. A preliminary set of cell constants and an orientation matrix were calculated from a small sampling of reflections.<sup>1</sup> A short pre-experiment was run, from which an optimal data collection strategy was determined. The full data collection was carried out using a PhotonJet (Cu) X-ray source with frame times of 0.12 and 0.47 seconds and a detector distance of 34.0 mm. Series of frames were collected in 0.50° steps in  $\omega$  at different  $2\theta$ ,  $\kappa$ , and  $\phi$  settings. After the intensity data were corrected for absorption, the final cell constants were calculated from the xyz centroids of 37721 strong reflections from the actual data collection after integration.<sup>1</sup> See Table 1 for additional crystal and refinement information.

### Structure solution and refinement

The structure was solved using SHELXT<sup>2</sup> and refined using SHELXL.<sup>3</sup> The space group  $P2_1/n$  was determined based on systematic absences. Most or all non-hydrogen atoms were assigned from the solution. Full-matrix least squares / difference Fourier cycles were performed which located any remaining non-hydrogen atoms. All non-hydrogen atoms were refined with anisotropic displacement parameters. The O-H hydrogen atoms were found from the difference Fourier map and refined freely. All other hydrogen atoms were placed in ideal positions and refined as riding atoms with relative isotropic displacement parameters. The final full matrix least squares refinement converged to  $R1 = 0.0286$  ( $F^2$ ,  $I > 2\sigma(I)$ ) and  $wR2 = 0.0732$  ( $F^2$ , all data).

### Structure description

The structure is the one suggested. The asymmetric unit contains two monocationic Re complexes and two Br anions in general positions. The cations and anions are linked via O-H...Br hydrogen bonding (see figures and Table 7).

Structure manipulation and figure generation were performed using Olex2.<sup>4</sup> Unless noted otherwise all structural diagrams containing anisotropic displacement ellipsoids are drawn at the 50 % probability level.

Data collection, structure solution, and structure refinement were conducted at the X-ray Crystallographic Facility, B04 Hutchison Hall, Department of Chemistry, University of Rochester. The instrument was purchased with funding from NSF MRI program grant CHE-1725028. .

- 
- 1 *CrysAlisPro*, version 171.41.120a; Rigaku Corporation: Oxford, UK, 2021.
  - 2 Sheldrick, G. M. *SHELXT*, version 2018/2; *Acta. Crystallogr.* **2015**, *A71*, 3-8.
  - 3 Sheldrick, G. M. *SHELXL*, version 2018/3; *Acta. Crystallogr.* **2015**, *C71*, 3-8.
  - 4 Dolomanov, O. V.; Bourhis, L. J.; Gildea, R. J.; Howard, J. A. K.; Puschmann, H. *Olex2*, version 1.3-ac4; *J. Appl. Cryst.* **2009**, *42*, 339-341.

Some equations of interest:

$$R_{\text{int}} = \Sigma |F_{\text{O}}^2 - \langle F_{\text{O}}^2 \rangle| / \Sigma |F_{\text{O}}^2|$$

$$R1 = \Sigma ||F_{\text{O}}| - |F_{\text{C}}|| / \Sigma |F_{\text{O}}|$$

$$wR2 = [\Sigma [w(F_{\text{O}}^2 - F_{\text{C}}^2)^2] / \Sigma [w(F_{\text{O}}^2)^2]]^{1/2}$$

where  $w = 1 / [\sigma^2 (F_{\text{O}}^2) + (aP)^2 + bP]$  and

$$P = 1/3 \max (0, F_{\text{O}}^2) + 2/3 F_{\text{C}}^2$$

$$\text{GOF} = S = [\Sigma [w(F_{\text{O}}^2 - F_{\text{C}}^2)^2] / (m-n)]^{1/2}$$

where  $m$  = number of reflections and  $n$  = number of parameters

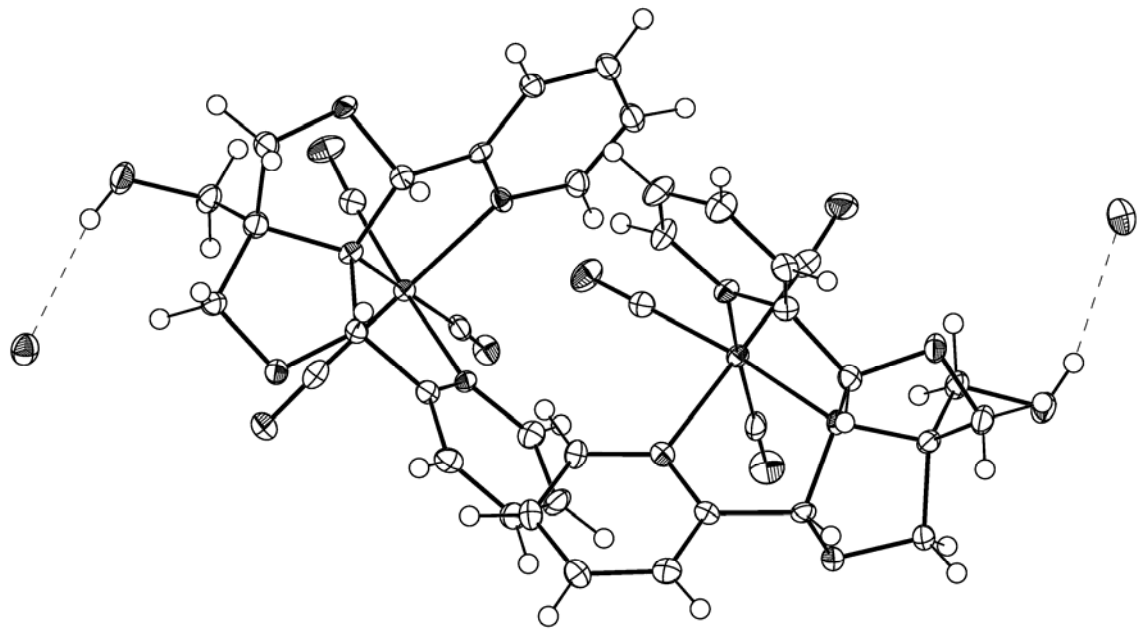

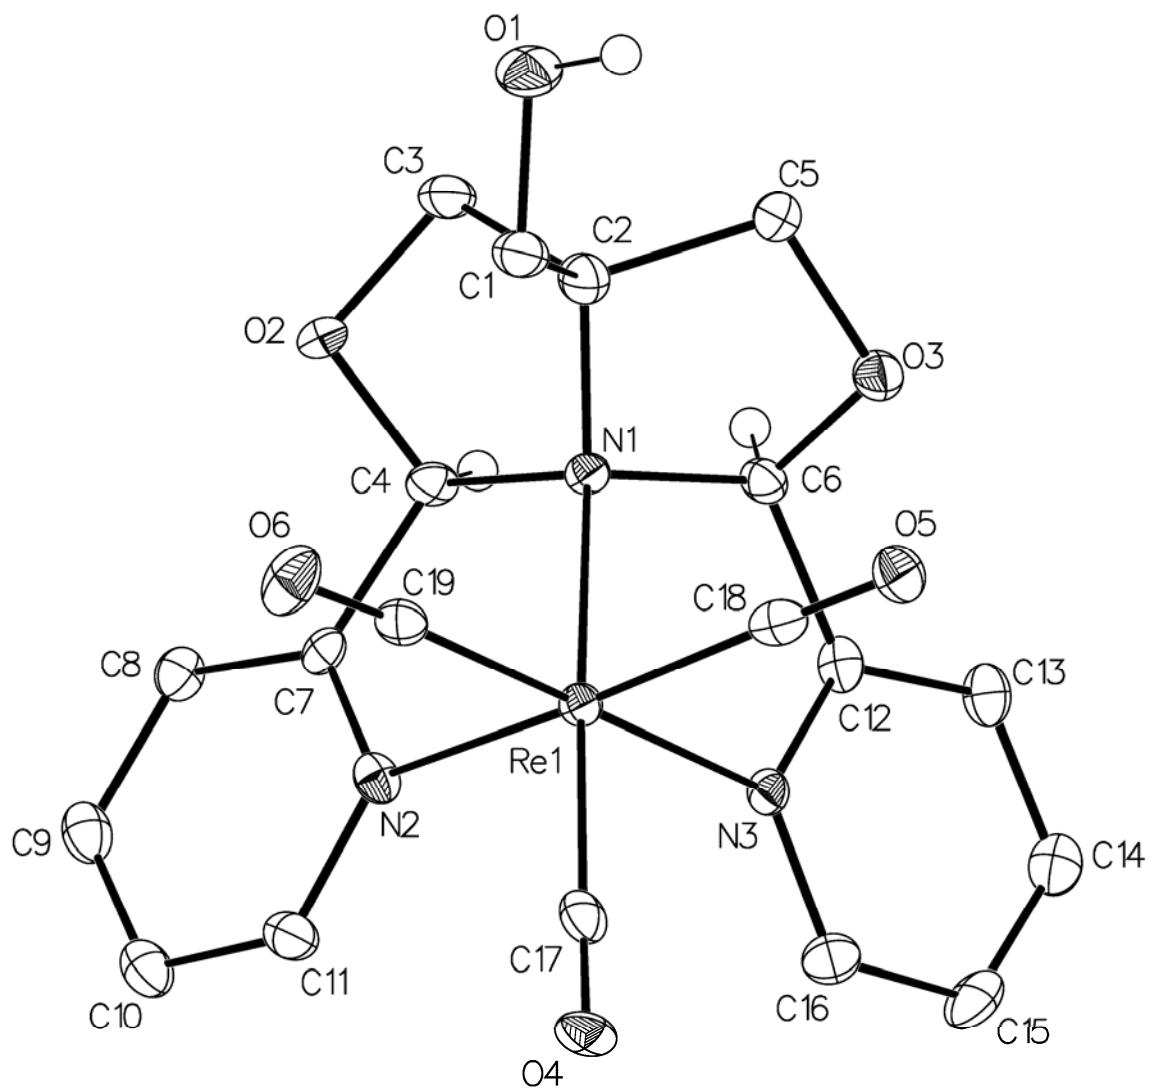

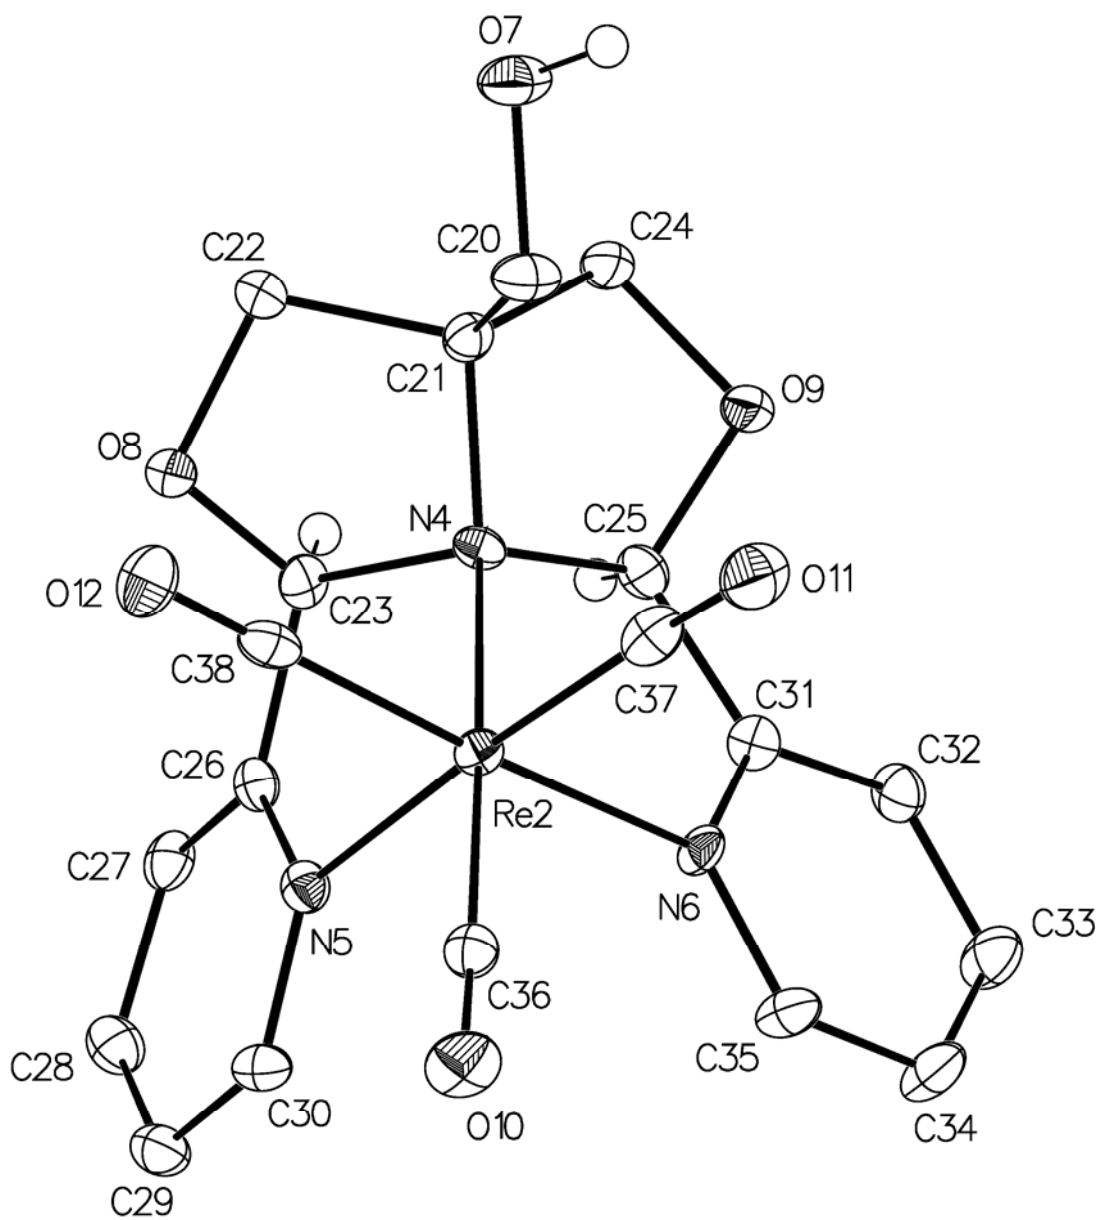

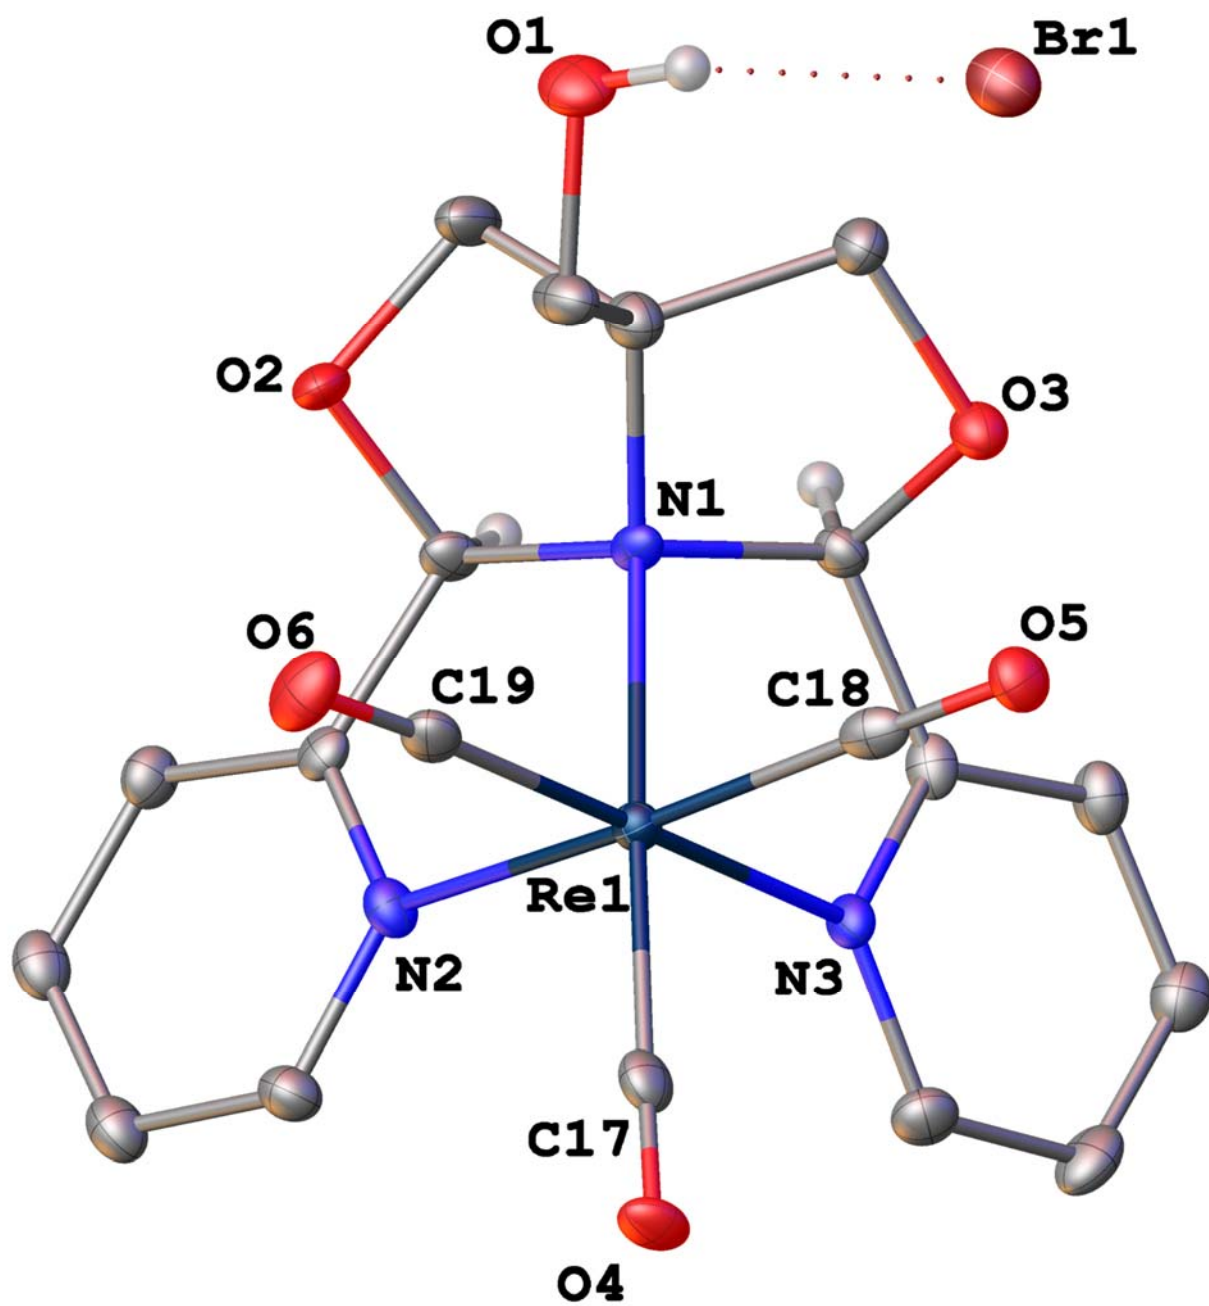

Table 1. Crystal data and structure refinement for **8**.

|                                                     |                                                                     |                              |
|-----------------------------------------------------|---------------------------------------------------------------------|------------------------------|
| Identification code                                 | jonrap04                                                            |                              |
| Empirical formula                                   | C <sub>19</sub> H <sub>17</sub> Br N <sub>3</sub> O <sub>6</sub> Re |                              |
| Formula weight                                      | 649.46                                                              |                              |
| Temperature                                         | 100.00(10) K                                                        |                              |
| Wavelength                                          | 1.54184 Å                                                           |                              |
| Crystal system                                      | monoclinic                                                          |                              |
| Space group                                         | <i>P</i> 2 <sub>1</sub> / <i>n</i>                                  |                              |
| Unit cell dimensions                                | <i>a</i> = 19.2317(2) Å                                             | $\alpha = 90^\circ$          |
|                                                     | <i>b</i> = 10.72530(10) Å                                           | $\beta = 102.0680(10)^\circ$ |
|                                                     | <i>c</i> = 20.2888(2) Å                                             | $\gamma = 90^\circ$          |
| Volume                                              | 4092.40(7) Å <sup>3</sup>                                           |                              |
| <i>Z</i>                                            | 8                                                                   |                              |
| Density (calculated)                                | 2.108 Mg/m <sup>3</sup>                                             |                              |
| Absorption coefficient                              | 14.283 mm <sup>-1</sup>                                             |                              |
| <i>F</i> (000)                                      | 2480                                                                |                              |
| Crystal color, morphology                           | colourless, block                                                   |                              |
| Crystal size                                        | 0.121 x 0.053 x 0.018 mm <sup>3</sup>                               |                              |
| Theta range for data collection                     | 2.880 to 80.217°                                                    |                              |
| Index ranges                                        | -24 ≤ <i>h</i> ≤ 24, -13 ≤ <i>k</i> ≤ 13, -25 ≤ <i>l</i> ≤ 24       |                              |
| Reflections collected                               | 53674                                                               |                              |
| Independent reflections                             | 8801 [ <i>R</i> (int) = 0.0489]                                     |                              |
| Observed reflections                                | 8381                                                                |                              |
| Completeness to theta = 74.504°                     | 99.9%                                                               |                              |
| Absorption correction                               | Multi-scan                                                          |                              |
| Max. and min. transmission                          | 1.00000 and 0.84454                                                 |                              |
| Refinement method                                   | Full-matrix least-squares on <i>F</i> <sup>2</sup>                  |                              |
| Data / restraints / parameters                      | 8801 / 0 / 549                                                      |                              |
| Goodness-of-fit on <i>F</i> <sup>2</sup>            | 1.078                                                               |                              |
| Final <i>R</i> indices [ <i>I</i> > 2σ( <i>I</i> )] | <i>R</i> 1 = 0.0286, <i>wR</i> 2 = 0.0721                           |                              |
| <i>R</i> indices (all data)                         | <i>R</i> 1 = 0.0304, <i>wR</i> 2 = 0.0732                           |                              |
| Largest diff. peak and hole                         | 1.251 and -1.266 e.Å <sup>-3</sup>                                  |                              |

Table 2. Atomic coordinates ( $\times 10^4$ ) and equivalent isotropic displacement parameters ( $\text{\AA}^2 \times 10^3$ ) for **8**.  $U_{\text{eq}}$  is defined as one third of the trace of the orthogonalized  $U_{ij}$  tensor.

|     | x       | y        | z       | $U_{\text{eq}}$ |
|-----|---------|----------|---------|-----------------|
| Re1 | 2318(1) | 7494(1)  | 5345(1) | 11(1)           |
| O1  | 2835(2) | 11741(3) | 4768(2) | 23(1)           |
| O2  | 4061(2) | 8862(3)  | 4866(2) | 19(1)           |
| O3  | 3178(2) | 9773(3)  | 6554(1) | 16(1)           |
| O4  | 989(2)  | 5848(3)  | 5043(2) | 18(1)           |
| O5  | 1405(2) | 9344(3)  | 5958(2) | 18(1)           |
| O6  | 1796(2) | 8327(3)  | 3874(2) | 24(1)           |
| N1  | 3318(2) | 8622(3)  | 5631(2) | 11(1)           |
| N2  | 3091(2) | 6273(3)  | 5036(2) | 13(1)           |
| N3  | 2763(2) | 6843(3)  | 6357(2) | 12(1)           |
| C1  | 2749(2) | 10451(4) | 4876(2) | 18(1)           |
| C2  | 3361(2) | 10010(4) | 5442(2) | 17(1)           |
| C3  | 4055(2) | 10047(4) | 5188(2) | 21(1)           |
| C4  | 3911(2) | 8023(4)  | 5351(2) | 14(1)           |
| C5  | 3357(2) | 10700(4) | 6103(2) | 16(1)           |
| C6  | 3507(2) | 8682(4)  | 6394(2) | 13(1)           |
| C7  | 3730(2) | 6776(4)  | 5023(2) | 12(1)           |
| C8  | 4239(2) | 6147(4)  | 4757(2) | 15(1)           |
| C9  | 4093(2) | 4958(4)  | 4497(2) | 18(1)           |
| C10 | 3444(2) | 4408(4)  | 4539(2) | 18(1)           |
| C11 | 2959(2) | 5095(4)  | 4807(2) | 17(1)           |
| C12 | 3246(2) | 7592(4)  | 6739(2) | 14(1)           |
| C13 | 3469(2) | 7426(4)  | 7429(2) | 17(1)           |
| C14 | 3208(2) | 6424(4)  | 7729(2) | 18(1)           |
| C15 | 2748(2) | 5599(4)  | 7332(2) | 21(1)           |
| C16 | 2535(2) | 5837(4)  | 6649(2) | 17(1)           |
| C17 | 1503(2) | 6411(4)  | 5166(2) | 16(1)           |
| C18 | 1738(2) | 8662(4)  | 5717(2) | 15(1)           |



|     |         |          |         |       |
|-----|---------|----------|---------|-------|
| C19 | 1988(2) | 8054(4)  | 4424(2) | 15(1) |
| Re2 | 5044(1) | 3665(1)  | 7446(1) | 12(1) |
| O7  | 5004(2) | -801(3)  | 7802(2) | 23(1) |
| O8  | 4749(2) | 2342(3)  | 8944(1) | 15(1) |
| O9  | 6617(2) | 1336(3)  | 8278(2) | 20(1) |
| O10 | 4337(2) | 5553(3)  | 6383(2) | 25(1) |
| O11 | 5093(2) | 2022(3)  | 6216(2) | 28(1) |
| O12 | 3530(2) | 2771(3)  | 7471(2) | 26(1) |
| N4  | 5601(2) | 2480(3)  | 8309(2) | 11(1) |
| N5  | 5097(2) | 4883(3)  | 8304(2) | 14(1) |
| N6  | 6158(2) | 4188(3)  | 7568(2) | 13(1) |
| C20 | 5098(2) | 489(4)   | 7684(2) | 19(1) |
| C21 | 5442(2) | 1082(4)  | 8357(2) | 14(1) |
| C22 | 4936(2) | 1053(4)  | 8858(2) | 18(1) |
| C23 | 5386(2) | 2970(4)  | 8937(2) | 14(1) |
| C24 | 6189(2) | 547(4)   | 8611(2) | 19(1) |
| C25 | 6400(2) | 2541(4)  | 8415(2) | 15(1) |
| C26 | 5313(2) | 4362(4)  | 8915(2) | 13(1) |
| C27 | 5471(2) | 5063(4)  | 9499(2) | 17(1) |
| C28 | 5340(2) | 6334(4)  | 9460(2) | 18(1) |
| C29 | 5099(2) | 6878(4)  | 8833(2) | 18(1) |
| C30 | 5013(2) | 6123(4)  | 8267(2) | 16(1) |
| C31 | 6654(2) | 3516(4)  | 7994(2) | 15(1) |
| C32 | 7379(2) | 3765(4)  | 8085(2) | 17(1) |
| C33 | 7599(2) | 4730(4)  | 7724(2) | 22(1) |
| C34 | 7091(2) | 5449(4)  | 7303(2) | 23(1) |
| C35 | 6381(2) | 5148(4)  | 7239(2) | 18(1) |
| C36 | 4614(2) | 4869(4)  | 6781(2) | 16(1) |
| C37 | 5083(2) | 2599(4)  | 6686(2) | 19(1) |
| C38 | 4087(2) | 3106(4)  | 7459(2) | 16(1) |
| Br1 | 1673(1) | 12892(1) | 5518(1) | 22(1) |
| Br2 | 5635(1) | -1884(1) | 6574(1) | 23(1) |

---

Table 3. Bond lengths [Å] and angles [°] for **8**.

|             |          |             |          |
|-------------|----------|-------------|----------|
| Re(1)-N(1)  | 2.245(3) | C(5)-H(5B)  | 0.9900   |
| Re(1)-N(2)  | 2.171(3) | C(6)-H(6)   | 1.0000   |
| Re(1)-N(3)  | 2.169(3) | C(6)-C(12)  | 1.502(5) |
| Re(1)-C(17) | 1.923(4) | C(7)-C(8)   | 1.388(5) |
| Re(1)-C(18) | 1.933(4) | C(8)-H(8)   | 0.9500   |
| Re(1)-C(19) | 1.938(4) | C(8)-C(9)   | 1.386(6) |
| O(1)-H(1)   | 0.86(8)  | C(9)-H(9)   | 0.9500   |
| O(1)-C(1)   | 1.416(5) | C(9)-C(10)  | 1.399(6) |
| O(2)-C(3)   | 1.430(5) | C(10)-H(10) | 0.9500   |
| O(2)-C(4)   | 1.407(5) | C(10)-C(11) | 1.386(6) |
| O(3)-C(5)   | 1.441(5) | C(11)-H(11) | 0.9500   |
| O(3)-C(6)   | 1.401(5) | C(12)-C(13) | 1.388(6) |
| O(4)-C(17)  | 1.141(5) | C(13)-H(13) | 0.9500   |
| O(5)-C(18)  | 1.146(5) | C(13)-C(14) | 1.380(6) |
| O(6)-C(19)  | 1.137(5) | C(14)-H(14) | 0.9500   |
| N(1)-C(2)   | 1.544(5) | C(14)-C(15) | 1.383(7) |
| N(1)-C(4)   | 1.518(5) | C(15)-H(15) | 0.9500   |
| N(1)-C(6)   | 1.516(5) | C(15)-C(16) | 1.384(6) |
| N(2)-C(7)   | 1.346(5) | C(16)-H(16) | 0.9500   |
| N(2)-C(11)  | 1.351(5) | Re(2)-N(4)  | 2.248(3) |
| N(3)-C(12)  | 1.344(5) | Re(2)-N(5)  | 2.162(3) |
| N(3)-C(16)  | 1.347(5) | Re(2)-N(6)  | 2.179(3) |
| C(1)-H(1A)  | 0.9900   | Re(2)-C(36) | 1.924(4) |
| C(1)-H(1B)  | 0.9900   | Re(2)-C(37) | 1.933(4) |
| C(1)-C(2)   | 1.537(6) | Re(2)-C(38) | 1.941(4) |
| C(2)-C(3)   | 1.528(6) | O(7)-H(7)   | 0.77(6)  |
| C(2)-C(5)   | 1.534(5) | O(7)-C(20)  | 1.422(5) |
| C(3)-H(3A)  | 0.9900   | O(8)-C(22)  | 1.448(5) |
| C(3)-H(3B)  | 0.9900   | O(8)-C(23)  | 1.399(5) |
| C(4)-H(4)   | 1.0000   | O(9)-C(24)  | 1.444(5) |
| C(4)-C(7)   | 1.502(5) | O(9)-C(25)  | 1.403(5) |
| C(5)-H(5A)  | 0.9900   | O(10)-C(36) | 1.137(5) |

|              |          |                   |            |
|--------------|----------|-------------------|------------|
| O(11)-C(37)  | 1.141(6) | C(33)-C(34)       | 1.390(6)   |
| O(12)-C(38)  | 1.133(5) | C(34)-H(34)       | 0.9500     |
| N(4)-C(21)   | 1.538(5) | C(34)-C(35)       | 1.383(6)   |
| N(4)-C(23)   | 1.514(5) | C(35)-H(35)       | 0.9500     |
| N(4)-C(25)   | 1.508(5) | N(2)-Re(1)-N(1)   | 78.31(12)  |
| N(5)-C(26)   | 1.344(5) | N(3)-Re(1)-N(1)   | 77.33(12)  |
| N(5)-C(30)   | 1.341(5) | N(3)-Re(1)-N(2)   | 85.42(12)  |
| N(6)-C(31)   | 1.353(5) | C(17)-Re(1)-N(1)  | 174.35(15) |
| N(6)-C(35)   | 1.344(5) | C(17)-Re(1)-N(2)  | 99.31(15)  |
| C(20)-H(20A) | 0.9900   | C(17)-Re(1)-N(3)  | 97.44(15)  |
| C(20)-H(20B) | 0.9900   | C(17)-Re(1)-C(18) | 87.22(16)  |
| C(20)-C(21)  | 1.526(6) | C(17)-Re(1)-C(19) | 85.15(17)  |
| C(21)-C(22)  | 1.546(5) | C(18)-Re(1)-N(1)  | 94.75(14)  |
| C(21)-C(24)  | 1.532(6) | C(18)-Re(1)-N(2)  | 171.94(15) |
| C(22)-H(22A) | 0.9900   | C(18)-Re(1)-N(3)  | 89.08(14)  |
| C(22)-H(22B) | 0.9900   | C(18)-Re(1)-C(19) | 94.41(17)  |
| C(23)-H(23)  | 1.0000   | C(19)-Re(1)-N(1)  | 99.95(14)  |
| C(23)-C(26)  | 1.500(6) | C(19)-Re(1)-N(2)  | 90.86(15)  |
| C(24)-H(24A) | 0.9900   | C(19)-Re(1)-N(3)  | 175.76(15) |
| C(24)-H(24B) | 0.9900   | C(1)-O(1)-H(1)    | 108(5)     |
| C(25)-H(25)  | 1.0000   | C(4)-O(2)-C(3)    | 103.0(3)   |
| C(25)-C(31)  | 1.495(6) | C(6)-O(3)-C(5)    | 104.4(3)   |
| C(26)-C(27)  | 1.382(6) | C(2)-N(1)-Re(1)   | 122.9(2)   |
| C(27)-H(27)  | 0.9500   | C(4)-N(1)-Re(1)   | 110.2(2)   |
| C(27)-C(28)  | 1.386(6) | C(4)-N(1)-C(2)    | 103.4(3)   |
| C(28)-H(28)  | 0.9500   | C(6)-N(1)-Re(1)   | 107.3(2)   |
| C(28)-C(29)  | 1.387(6) | C(6)-N(1)-C(2)    | 101.5(3)   |
| C(29)-H(29)  | 0.9500   | C(6)-N(1)-C(4)    | 111.2(3)   |
| C(29)-C(30)  | 1.387(6) | C(7)-N(2)-Re(1)   | 116.5(3)   |
| C(30)-H(30)  | 0.9500   | C(7)-N(2)-C(11)   | 118.4(3)   |
| C(31)-C(32)  | 1.394(6) | C(11)-N(2)-Re(1)  | 124.8(3)   |
| C(32)-H(32)  | 0.9500   | C(12)-N(3)-Re(1)  | 116.3(3)   |
| C(32)-C(33)  | 1.384(6) | C(12)-N(3)-C(16)  | 118.3(3)   |
| C(33)-H(33)  | 0.9500   | C(16)-N(3)-Re(1)  | 125.0(3)   |

|                  |          |                   |          |
|------------------|----------|-------------------|----------|
| O(1)-C(1)-H(1A)  | 110.0    | C(12)-C(6)-N(1)   | 114.3(3) |
| O(1)-C(1)-H(1B)  | 110.0    | C(12)-C(6)-H(6)   | 109.6    |
| O(1)-C(1)-C(2)   | 108.7(3) | N(2)-C(7)-C(4)    | 118.5(3) |
| H(1A)-C(1)-H(1B) | 108.3    | N(2)-C(7)-C(8)    | 122.2(4) |
| C(2)-C(1)-H(1A)  | 110.0    | C(8)-C(7)-C(4)    | 119.3(3) |
| C(2)-C(1)-H(1B)  | 110.0    | C(7)-C(8)-H(8)    | 120.2    |
| C(1)-C(2)-N(1)   | 114.2(3) | C(9)-C(8)-C(7)    | 119.5(4) |
| C(3)-C(2)-N(1)   | 101.8(3) | C(9)-C(8)-H(8)    | 120.2    |
| C(3)-C(2)-C(1)   | 109.1(3) | C(8)-C(9)-H(9)    | 120.8    |
| C(3)-C(2)-C(5)   | 116.5(4) | C(8)-C(9)-C(10)   | 118.5(4) |
| C(5)-C(2)-N(1)   | 103.7(3) | C(10)-C(9)-H(9)   | 120.8    |
| C(5)-C(2)-C(1)   | 111.2(3) | C(9)-C(10)-H(10)  | 120.6    |
| O(2)-C(3)-C(2)   | 102.8(3) | C(11)-C(10)-C(9)  | 118.8(4) |
| O(2)-C(3)-H(3A)  | 111.2    | C(11)-C(10)-H(10) | 120.6    |
| O(2)-C(3)-H(3B)  | 111.2    | N(2)-C(11)-C(10)  | 122.5(4) |
| C(2)-C(3)-H(3A)  | 111.2    | N(2)-C(11)-H(11)  | 118.8    |
| C(2)-C(3)-H(3B)  | 111.2    | C(10)-C(11)-H(11) | 118.8    |
| H(3A)-C(3)-H(3B) | 109.1    | N(3)-C(12)-C(6)   | 117.0(3) |
| O(2)-C(4)-N(1)   | 105.7(3) | N(3)-C(12)-C(13)  | 122.4(4) |
| O(2)-C(4)-H(4)   | 109.1    | C(13)-C(12)-C(6)  | 120.5(4) |
| O(2)-C(4)-C(7)   | 108.8(3) | C(12)-C(13)-H(13) | 120.7    |
| N(1)-C(4)-H(4)   | 109.1    | C(14)-C(13)-C(12) | 118.6(4) |
| C(7)-C(4)-N(1)   | 114.8(3) | C(14)-C(13)-H(13) | 120.7    |
| C(7)-C(4)-H(4)   | 109.1    | C(13)-C(14)-H(14) | 120.3    |
| O(3)-C(5)-C(2)   | 105.6(3) | C(13)-C(14)-C(15) | 119.3(4) |
| O(3)-C(5)-H(5A)  | 110.6    | C(15)-C(14)-H(14) | 120.3    |
| O(3)-C(5)-H(5B)  | 110.6    | C(14)-C(15)-H(15) | 120.5    |
| C(2)-C(5)-H(5A)  | 110.6    | C(14)-C(15)-C(16) | 118.9(4) |
| C(2)-C(5)-H(5B)  | 110.6    | C(16)-C(15)-H(15) | 120.5    |
| H(5A)-C(5)-H(5B) | 108.8    | N(3)-C(16)-C(15)  | 122.2(4) |
| O(3)-C(6)-N(1)   | 104.4(3) | N(3)-C(16)-H(16)  | 118.9    |
| O(3)-C(6)-H(6)   | 109.6    | C(15)-C(16)-H(16) | 118.9    |
| O(3)-C(6)-C(12)  | 109.3(3) | O(4)-C(17)-Re(1)  | 174.7(4) |
| N(1)-C(6)-H(6)   | 109.6    | O(5)-C(18)-Re(1)  | 177.9(4) |

|                   |            |                     |          |
|-------------------|------------|---------------------|----------|
| O(6)-C(19)-Re(1)  | 176.9(4)   | H(20A)-C(20)-H(20B) | 108.5    |
| N(5)-Re(2)-N(4)   | 77.25(12)  | C(21)-C(20)-H(20A)  | 110.2    |
| N(5)-Re(2)-N(6)   | 82.74(12)  | C(21)-C(20)-H(20B)  | 110.2    |
| N(6)-Re(2)-N(4)   | 76.08(12)  | N(4)-C(21)-C(22)    | 102.8(3) |
| C(36)-Re(2)-N(4)  | 172.29(15) | C(20)-C(21)-N(4)    | 113.8(3) |
| C(36)-Re(2)-N(5)  | 95.72(15)  | C(20)-C(21)-C(22)   | 111.4(3) |
| C(36)-Re(2)-N(6)  | 100.09(15) | C(20)-C(21)-C(24)   | 110.2(3) |
| C(36)-Re(2)-C(37) | 85.47(18)  | C(24)-C(21)-N(4)    | 101.6(3) |
| C(36)-Re(2)-C(38) | 87.00(17)  | C(24)-C(21)-C(22)   | 116.5(3) |
| C(37)-Re(2)-N(4)  | 101.27(15) | O(8)-C(22)-C(21)    | 105.4(3) |
| C(37)-Re(2)-N(5)  | 175.10(15) | O(8)-C(22)-H(22A)   | 110.7    |
| C(37)-Re(2)-N(6)  | 92.38(16)  | O(8)-C(22)-H(22B)   | 110.7    |
| C(37)-Re(2)-C(38) | 91.37(18)  | C(21)-C(22)-H(22A)  | 110.7    |
| C(38)-Re(2)-N(4)  | 96.50(14)  | C(21)-C(22)-H(22B)  | 110.7    |
| C(38)-Re(2)-N(5)  | 93.44(15)  | H(22A)-C(22)-H(22B) | 108.8    |
| C(38)-Re(2)-N(6)  | 172.21(15) | O(8)-C(23)-N(4)     | 103.6(3) |
| C(20)-O(7)-H(7)   | 106(4)     | O(8)-C(23)-H(23)    | 109.4    |
| C(23)-O(8)-C(22)  | 102.6(3)   | O(8)-C(23)-C(26)    | 113.8(3) |
| C(25)-O(9)-C(24)  | 103.0(3)   | N(4)-C(23)-H(23)    | 109.4    |
| C(21)-N(4)-Re(2)  | 122.1(2)   | C(26)-C(23)-N(4)    | 111.1(3) |
| C(23)-N(4)-Re(2)  | 106.8(2)   | C(26)-C(23)-H(23)   | 109.4    |
| C(23)-N(4)-C(21)  | 101.1(3)   | O(9)-C(24)-C(21)    | 102.1(3) |
| C(25)-N(4)-Re(2)  | 113.1(2)   | O(9)-C(24)-H(24A)   | 111.3    |
| C(25)-N(4)-C(21)  | 104.2(3)   | O(9)-C(24)-H(24B)   | 111.3    |
| C(25)-N(4)-C(23)  | 108.4(3)   | C(21)-C(24)-H(24A)  | 111.3    |
| C(26)-N(5)-Re(2)  | 116.4(3)   | C(21)-C(24)-H(24B)  | 111.3    |
| C(30)-N(5)-Re(2)  | 124.8(3)   | H(24A)-C(24)-H(24B) | 109.2    |
| C(30)-N(5)-C(26)  | 118.3(3)   | O(9)-C(25)-N(4)     | 105.5(3) |
| C(31)-N(6)-Re(2)  | 118.7(3)   | O(9)-C(25)-H(25)    | 108.4    |
| C(35)-N(6)-Re(2)  | 123.3(3)   | O(9)-C(25)-C(31)    | 112.7(3) |
| C(35)-N(6)-C(31)  | 118.0(3)   | N(4)-C(25)-H(25)    | 108.4    |
| O(7)-C(20)-H(20A) | 110.2      | C(31)-C(25)-N(4)    | 113.2(3) |
| O(7)-C(20)-H(20B) | 110.2      | C(31)-C(25)-H(25)   | 108.4    |
| O(7)-C(20)-C(21)  | 107.5(3)   | N(5)-C(26)-C(23)    | 116.8(3) |

|                   |          |                   |          |
|-------------------|----------|-------------------|----------|
| N(5)-C(26)-C(27)  | 122.4(4) | C(32)-C(31)-C(25) | 119.7(4) |
| C(27)-C(26)-C(23) | 120.9(4) | C(31)-C(32)-H(32) | 120.6    |
| C(26)-C(27)-H(27) | 120.6    | C(33)-C(32)-C(31) | 118.8(4) |
| C(26)-C(27)-C(28) | 118.8(4) | C(33)-C(32)-H(32) | 120.6    |
| C(28)-C(27)-H(27) | 120.6    | C(32)-C(33)-H(33) | 120.5    |
| C(27)-C(28)-H(28) | 120.4    | C(32)-C(33)-C(34) | 119.1(4) |
| C(27)-C(28)-C(29) | 119.2(4) | C(34)-C(33)-H(33) | 120.5    |
| C(29)-C(28)-H(28) | 120.4    | C(33)-C(34)-H(34) | 120.6    |
| C(28)-C(29)-H(29) | 120.9    | C(35)-C(34)-C(33) | 118.8(4) |
| C(30)-C(29)-C(28) | 118.2(4) | C(35)-C(34)-H(34) | 120.6    |
| C(30)-C(29)-H(29) | 120.9    | N(6)-C(35)-C(34)  | 122.9(4) |
| N(5)-C(30)-C(29)  | 122.7(4) | N(6)-C(35)-H(35)  | 118.5    |
| N(5)-C(30)-H(30)  | 118.6    | C(34)-C(35)-H(35) | 118.5    |
| C(29)-C(30)-H(30) | 118.6    | O(10)-C(36)-Re(2) | 177.4(4) |
| N(6)-C(31)-C(25)  | 117.9(3) | O(11)-C(37)-Re(2) | 176.4(4) |
| N(6)-C(31)-C(32)  | 122.2(4) | O(12)-C(38)-Re(2) | 179.4(4) |

Table 4. Anisotropic displacement parameters ( $\text{\AA}^2 \times 10^3$ ) for **8**. The anisotropic displacement factor exponent takes the form:  $-2\pi^2 [ h^2 a^{*2} U_{11} + \dots + 2 h k a^* b^* U_{12} ]$

|     | U <sub>11</sub> | U <sub>22</sub> | U <sub>33</sub> | U <sub>23</sub> | U <sub>13</sub> | U <sub>12</sub> |
|-----|-----------------|-----------------|-----------------|-----------------|-----------------|-----------------|
| Re1 | 11(1)           | 11(1)           | 10(1)           | 0(1)            | 1(1)            | -1(1)           |
| O1  | 30(2)           | 15(2)           | 22(2)           | 5(1)            | 3(1)            | 1(1)            |
| O2  | 28(2)           | 13(1)           | 20(1)           | 0(1)            | 13(1)           | -6(1)           |
| O3  | 20(1)           | 13(1)           | 14(1)           | 1(1)            | 4(1)            | 1(1)            |
| O4  | 12(1)           | 16(1)           | 26(2)           | -5(1)           | 3(1)            | -6(1)           |
| O5  | 18(1)           | 17(1)           | 19(1)           | -2(1)           | 5(1)            | 2(1)            |
| O6  | 21(2)           | 35(2)           | 14(1)           | 6(1)            | 0(1)            | -3(1)           |
| N1  | 11(2)           | 13(2)           | 9(1)            | 0(1)            | -1(1)           | -4(1)           |
| N2  | 14(2)           | 13(2)           | 12(2)           | -1(1)           | 1(1)            | 4(1)            |
| N3  | 16(2)           | 12(2)           | 8(1)            | 1(1)            | 1(1)            | 1(1)            |
| C1  | 25(2)           | 14(2)           | 15(2)           | 0(2)            | 1(2)            | -4(2)           |
| C2  | 21(2)           | 15(2)           | 14(2)           | 0(2)            | 2(2)            | -1(2)           |
| C3  | 24(2)           | 14(2)           | 29(2)           | -4(2)           | 14(2)           | -5(2)           |
| C4  | 10(2)           | 13(2)           | 18(2)           | -1(2)           | 3(1)            | -3(1)           |
| C5  | 21(2)           | 15(2)           | 14(2)           | 0(2)            | 5(2)            | -2(2)           |
| C6  | 15(2)           | 12(2)           | 12(2)           | -2(1)           | 1(1)            | -2(1)           |
| C7  | 13(2)           | 14(2)           | 8(2)            | 3(1)            | 1(1)            | 1(1)            |
| C8  | 13(2)           | 17(2)           | 16(2)           | 1(2)            | 4(2)            | 3(2)            |
| C9  | 21(2)           | 17(2)           | 15(2)           | 0(2)            | 3(2)            | 6(2)            |
| C10 | 23(2)           | 15(2)           | 16(2)           | -2(2)           | 2(2)            | 4(2)            |
| C11 | 19(2)           | 13(2)           | 17(2)           | -1(2)           | 2(2)            | -1(2)           |
| C12 | 13(2)           | 16(2)           | 10(2)           | 1(1)            | -1(1)           | 5(1)            |
| C13 | 16(2)           | 22(2)           | 12(2)           | -1(2)           | 1(2)            | 3(2)            |
| C14 | 19(2)           | 20(2)           | 17(2)           | 2(2)            | 4(2)            | 4(2)            |
| C15 | 24(2)           | 21(2)           | 20(2)           | 10(2)           | 8(2)            | 4(2)            |
| C16 | 14(2)           | 18(2)           | 20(2)           | 1(2)            | 3(2)            | -2(2)           |
| C17 | 20(2)           | 13(2)           | 15(2)           | -2(1)           | 4(2)            | 4(2)            |
| C18 | 14(2)           | 16(2)           | 13(2)           | 4(2)            | -4(2)           | -4(2)           |

|     |       |       |       |       |       |       |
|-----|-------|-------|-------|-------|-------|-------|
| C19 | 13(2) | 16(2) | 17(2) | -3(2) | 3(2)  | -5(2) |
| Re2 | 12(1) | 12(1) | 11(1) | 1(1)  | 1(1)  | 0(1)  |
| O7  | 38(2) | 14(2) | 19(2) | -1(1) | 7(1)  | -4(1) |
| O8  | 17(1) | 12(1) | 17(1) | 0(1)  | 6(1)  | 1(1)  |
| O9  | 17(1) | 12(1) | 32(2) | 4(1)  | 10(1) | 2(1)  |
| O10 | 25(2) | 28(2) | 21(2) | 11(1) | -1(1) | 4(1)  |
| O11 | 42(2) | 24(2) | 20(2) | -5(1) | 13(1) | -7(2) |
| O12 | 14(2) | 29(2) | 34(2) | -1(1) | 5(1)  | -5(1) |
| N4  | 12(2) | 10(2) | 11(2) | 1(1)  | -1(1) | 2(1)  |
| N5  | 12(2) | 14(2) | 14(2) | -1(1) | 2(1)  | 0(1)  |
| N6  | 9(1)  | 15(2) | 16(2) | 2(1)  | 3(1)  | -3(1) |
| C20 | 29(2) | 13(2) | 15(2) | 0(2)  | 2(2)  | -2(2) |
| C21 | 14(2) | 14(2) | 14(2) | 3(1)  | 4(1)  | 1(2)  |
| C22 | 20(2) | 13(2) | 22(2) | 2(2)  | 9(2)  | 3(2)  |
| C23 | 16(2) | 17(2) | 8(2)  | 2(1)  | 2(1)  | 2(2)  |
| C24 | 16(2) | 14(2) | 28(2) | 6(2)  | 8(2)  | 3(2)  |
| C25 | 12(2) | 16(2) | 15(2) | 1(1)  | 1(2)  | 3(1)  |
| C26 | 11(2) | 15(2) | 12(2) | -2(1) | 2(1)  | 0(1)  |
| C27 | 12(2) | 20(2) | 18(2) | -1(2) | 4(2)  | -4(2) |
| C28 | 19(2) | 17(2) | 18(2) | -4(2) | 3(2)  | 1(2)  |
| C29 | 17(2) | 14(2) | 22(2) | 1(2)  | 3(2)  | 2(2)  |
| C30 | 16(2) | 12(2) | 18(2) | 1(2)  | 1(2)  | -1(2) |
| C31 | 14(2) | 16(2) | 13(2) | 0(2)  | 2(1)  | 0(2)  |
| C32 | 12(2) | 18(2) | 21(2) | -1(2) | 2(2)  | 1(2)  |
| C33 | 15(2) | 24(2) | 26(2) | 3(2)  | 4(2)  | -4(2) |
| C34 | 20(2) | 23(2) | 26(2) | 8(2)  | 7(2)  | -6(2) |
| C35 | 17(2) | 16(2) | 21(2) | 6(2)  | 1(2)  | -2(2) |
| C36 | 15(2) | 16(2) | 16(2) | -1(2) | 3(2)  | -1(2) |
| C37 | 17(2) | 22(2) | 17(2) | 4(2)  | 2(2)  | -3(2) |
| C38 | 21(2) | 12(2) | 15(2) | 1(1)  | 1(2)  | 3(2)  |
| Br1 | 25(1) | 19(1) | 20(1) | 1(1)  | 0(1)  | 1(1)  |
| Br2 | 18(1) | 20(1) | 28(1) | -3(1) | 0(1)  | 2(1)  |

---



Table 5. Hydrogen coordinates ( $\times 10^4$ ) and isotropic displacement parameters ( $\text{\AA}^2 \times 10^3$ ) for **8**.

|      | x        | y         | z        | U(eq)  |
|------|----------|-----------|----------|--------|
| H1   | 2530(40) | 12140(70) | 4950(40) | 50(20) |
| H1A  | 2754     | 9981      | 4457     | 22     |
| H1B  | 2287     | 10301     | 5005     | 22     |
| H3A  | 4054     | 10738     | 4865     | 25     |
| H3B  | 4471     | 10139     | 5566     | 25     |
| H4   | 4342     | 7935      | 5722     | 16     |
| H5A  | 3831     | 11063     | 6290     | 20     |
| H5B  | 3001     | 11378     | 6030     | 20     |
| H6   | 4034     | 8760      | 6549     | 16     |
| H8   | 4683     | 6528      | 4752     | 18     |
| H9   | 4426     | 4526      | 4295     | 21     |
| H10  | 3337     | 3579      | 4386     | 22     |
| H11  | 2516     | 4724      | 4831     | 20     |
| H13  | 3796     | 7991      | 7691     | 20     |
| H14  | 3342     | 6302      | 8202     | 22     |
| H15  | 2582     | 4881      | 7526     | 25     |
| H16  | 2218     | 5273      | 6378     | 21     |
| H7   | 5160(30) | -1150(50) | 7540(30) | 18(14) |
| H20A | 4633     | 886       | 7501     | 23     |
| H20B | 5407     | 599       | 7355     | 23     |
| H22A | 4507     | 554       | 8674     | 21     |
| H22B | 5178     | 688       | 9294     | 21     |
| H23  | 5751     | 2724      | 9343     | 16     |
| H24A | 6336     | 613       | 9108     | 23     |
| H24B | 6215     | -336      | 8476     | 23     |
| H25  | 6598     | 2733      | 8900     | 18     |
| H27  | 5665     | 4680      | 9919     | 20     |
| H28  | 5415     | 6828      | 9857     | 22     |

|     |      |      |      |    |
|-----|------|------|------|----|
| H29 | 4996 | 7744 | 8793 | 22 |
| H30 | 4889 | 6502 | 7835 | 19 |
| H32 | 7716 | 3281 | 8389 | 21 |
| H33 | 8091 | 4898 | 7765 | 26 |
| H34 | 7229 | 6135 | 7063 | 27 |
| H35 | 6035 | 5641 | 6951 | 22 |

---

Table 6. Torsion angles [°] for **8**.

|                |           |                 |           |
|----------------|-----------|-----------------|-----------|
| Re1-N1-C2-C1   | -17.2(4)  | C2-N1-C6-O3     | 38.1(4)   |
| Re1-N1-C2-C3   | -134.7(3) | C2-N1-C6-C12    | 157.4(3)  |
| Re1-N1-C2-C5   | 104.0(3)  | C3-O2-C4-N1     | 43.0(4)   |
| Re1-N1-C4-O2   | 113.5(3)  | C3-O2-C4-C7     | 166.8(3)  |
| Re1-N1-C4-C7   | -6.4(4)   | C3-C2-C5-O3     | -121.8(4) |
| Re1-N1-C6-O3   | -92.0(3)  | C4-O2-C3-C2     | -49.0(4)  |
| Re1-N1-C6-C12  | 27.4(4)   | C4-N1-C2-C1     | 108.0(4)  |
| Re1-N2-C7-C4   | 12.4(4)   | C4-N1-C2-C3     | -9.5(4)   |
| Re1-N2-C7-C8   | -171.8(3) | C4-N1-C2-C5     | -130.8(3) |
| Re1-N2-C11-C10 | 171.9(3)  | C4-N1-C6-O3     | 147.5(3)  |
| Re1-N3-C12-C6  | -9.4(4)   | C4-N1-C6-C12    | -93.2(4)  |
| Re1-N3-C12-C13 | 166.9(3)  | C4-C7-C8-C9     | 175.4(4)  |
| Re1-N3-C16-C15 | -167.8(3) | C5-O3-C6-N1     | -46.7(4)  |
| O1-C1-C2-N1    | 177.9(3)  | C5-O3-C6-C12    | -169.4(3) |
| O1-C1-C2-C3    | -69.0(4)  | C5-C2-C3-O2     | 147.0(4)  |
| O1-C1-C2-C5    | 60.9(4)   | C6-O3-C5-C2     | 35.7(4)   |
| O2-C4-C7-N2    | -121.7(4) | C6-N1-C2-C1     | -136.7(3) |
| O2-C4-C7-C8    | 62.4(5)   | C6-N1-C2-C3     | 105.9(3)  |
| O3-C6-C12-N3   | 103.2(4)  | C6-N1-C2-C5     | -15.5(4)  |
| O3-C6-C12-C13  | -73.2(5)  | C6-N1-C4-O2     | -127.7(3) |
| N1-C2-C3-O2    | 35.0(4)   | C6-N1-C4-C7     | 112.4(4)  |
| N1-C2-C5-O3    | -10.9(4)  | C6-C12-C13-C14  | 179.0(4)  |
| N1-C4-C7-N2    | -3.5(5)   | C7-N2-C11-C10   | -2.4(6)   |
| N1-C4-C7-C8    | -179.4(3) | C7-C8-C9-C10    | -2.7(6)   |
| N1-C6-C12-N3   | -13.4(5)  | C8-C9-C10-C11   | 3.2(6)    |
| N1-C6-C12-C13  | 170.2(3)  | C9-C10-C11-N2   | -0.7(6)   |
| N2-C7-C8-C9    | -0.4(6)   | C11-N2-C7-C4    | -172.9(3) |
| N3-C12-C13-C14 | 2.8(6)    | C11-N2-C7-C8    | 2.9(6)    |
| C1-C2-C3-O2    | -86.1(4)  | C12-N3-C16-C15  | 4.0(6)    |
| C1-C2-C5-O3    | 112.3(4)  | C12-C13-C14-C15 | 1.7(6)    |
| C2-N1-C4-O2    | -19.5(4)  | C13-C14-C15-C16 | -3.2(6)   |
| C2-N1-C4-C7    | -139.4(3) | C14-C15-C16-N3  | 0.3(6)    |

|                |           |                 |           |
|----------------|-----------|-----------------|-----------|
| C16-N3-C12-C6  | 178.1(3)  | C21-N4-C25-O9   | 19.7(4)   |
| C16-N3-C12-C13 | -5.6(6)   | C21-N4-C25-C31  | 143.4(3)  |
| Re2-N4-C21-C20 | 20.8(4)   | C22-O8-C23-N4   | 50.6(3)   |
| Re2-N4-C21-C22 | -99.9(3)  | C22-O8-C23-C26  | 171.3(3)  |
| Re2-N4-C21-C24 | 139.2(3)  | C22-C21-C24-O9  | -145.8(4) |
| Re2-N4-C23-O8  | 86.0(3)   | C23-O8-C22-C21  | -37.6(4)  |
| Re2-N4-C23-C26 | -36.5(3)  | C23-N4-C21-C20  | 138.9(3)  |
| Re2-N4-C25-O9  | -115.0(3) | C23-N4-C21-C22  | 18.2(4)   |
| Re2-N4-C25-C31 | 8.7(4)    | C23-N4-C21-C24  | -102.7(3) |
| Re2-N5-C26-C23 | -9.0(4)   | C23-N4-C25-O9   | 126.7(3)  |
| Re2-N5-C26-C27 | 170.3(3)  | C23-N4-C25-C31  | -109.6(4) |
| Re2-N5-C30-C29 | -175.4(3) | C23-C26-C27-C28 | -174.8(4) |
| Re2-N6-C31-C25 | -6.6(5)   | C24-O9-C25-N4   | -43.2(4)  |
| Re2-N6-C31-C32 | 178.0(3)  | C24-O9-C25-C31  | -167.3(3) |
| Re2-N6-C35-C34 | -177.9(3) | C24-C21-C22-O8  | 120.4(4)  |
| O7-C20-C21-N4  | 178.1(3)  | C25-O9-C24-C21  | 49.2(4)   |
| O7-C20-C21-C22 | -66.1(4)  | C25-N4-C21-C20  | -108.7(4) |
| O7-C20-C21-C24 | 64.8(4)   | C25-N4-C21-C22  | 130.6(3)  |
| O8-C23-C26-N5  | -84.7(4)  | C25-N4-C21-C24  | 9.7(4)    |
| O8-C23-C26-C27 | 96.0(4)   | C25-N4-C23-O8   | -151.8(3) |
| O9-C25-C31-N6  | 117.9(4)  | C25-N4-C23-C26  | 85.6(4)   |
| O9-C25-C31-C32 | -66.5(5)  | C25-C31-C32-C33 | -175.6(4) |
| N4-C21-C22-O8  | 10.4(4)   | C26-N5-C30-C29  | -3.9(6)   |
| N4-C21-C24-O9  | -35.0(4)  | C26-C27-C28-C29 | -4.1(6)   |
| N4-C23-C26-N5  | 31.8(5)   | C27-C28-C29-C30 | -1.4(6)   |
| N4-C23-C26-C27 | -147.5(4) | C28-C29-C30-N5  | 5.6(6)    |
| N4-C25-C31-N6  | -1.8(5)   | C30-N5-C26-C23  | 178.7(3)  |
| N4-C25-C31-C32 | 173.8(4)  | C30-N5-C26-C27  | -2.0(6)   |
| N5-C26-C27-C28 | 5.9(6)    | C31-N6-C35-C34  | 2.2(6)    |
| N6-C31-C32-C33 | -0.2(6)   | C31-C32-C33-C34 | 2.4(7)    |
| C20-C21-C22-O8 | -112.0(4) | C32-C33-C34-C35 | -2.3(7)   |
| C20-C21-C24-O9 | 86.0(4)   | C33-C34-C35-N6  | 0.0(7)    |
| C21-N4-C23-O8  | -42.7(3)  | C35-N6-C31-C25  | 173.4(4)  |
| C21-N4-C23-C26 | -165.2(3) | C35-N6-C31-C32  | -2.1(6)   |

Table 7. Hydrogen bonds and close contacts for **8** [Å and °].

| D-H...A     | d(D-H)  | d(H...A) | d(D...A) | <(DHA) |
|-------------|---------|----------|----------|--------|
| O1-H1...Br1 | 0.86(8) | 2.35(8)  | 3.204(4) | 170(7) |
| O7-H7...Br2 | 0.77(6) | 2.45(6)  | 3.208(4) | 169(5) |

REFERENCE NUMBER: jonrap11

## CRYSTAL STRUCTURE REPORT

 $C_{23} H_{24} N_3 O_7 Re$ 

or

 $(\kappa^3-N,N',O-L1^{meso-H})Re(CO)_3 \cdot thf$ **(10)**

Report prepared for:

R. Pohorenc, Prof. W. Jones

September 27, 2022

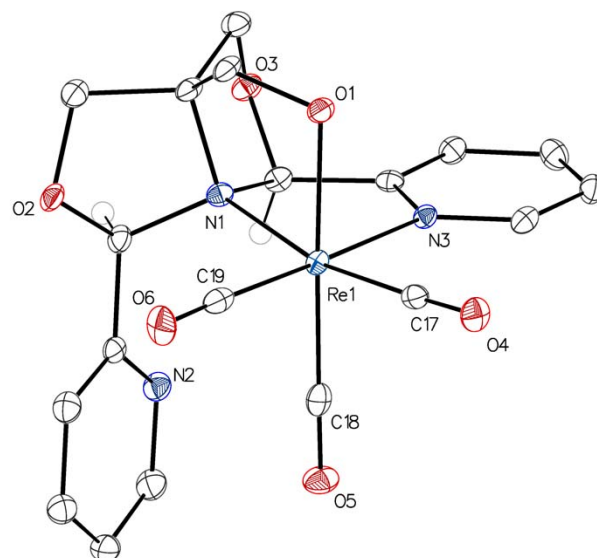

William W. Brennessel

X-ray Crystallographic Facility

Department of Chemistry, University of Rochester

120 Trustee Road

Rochester, NY 14627

### Data collection

A crystal (0.145 x 0.118 x 0.038 mm<sup>3</sup>) was placed onto a thin glass optical fiber or a nylon loop and mounted on a Rigaku XtaLAB Synergy-S Dualflex diffractometer equipped with a HyPix-6000HE HPC area detector for data collection at 100.01(10) K. A preliminary set of cell constants and an orientation matrix were calculated from a small sampling of reflections.<sup>1</sup> A short pre-experiment was run, from which an optimal data collection strategy was determined. The full data collection was carried out using a PhotonJet (Cu) X-ray source with a frame time of 0.05 seconds and a detector distance of 34.0 mm. Series of frames were collected in 0.50° steps in  $\omega$  at different  $2\theta$ ,  $\kappa$ , and  $\phi$  settings. After the intensity data were corrected for absorption, the final cell constants were calculated from the xyz centroids of 26456 strong reflections from the actual data collection after integration.<sup>1</sup> See Table 1 for additional crystal and refinement information.

### Structure solution and refinement

The structure was solved using SHELXT<sup>2</sup> and refined using SHELXL.<sup>3</sup> The space group  $P2_1/n$  was determined based on systematic absences. Most or all non-hydrogen atoms were assigned from the solution. Full-matrix least squares / difference Fourier cycles were performed which located any remaining non-hydrogen atoms. All non-hydrogen atoms were refined with anisotropic displacement parameters. All hydrogen atoms were placed in ideal positions and refined as riding atoms with relative isotropic displacement parameters. The final full matrix least squares refinement converged to  $R1 = 0.0254$  ( $F^2$ ,  $I > 2\sigma(I)$ ) and  $wR2 = 0.0584$  ( $F^2$ , all data).

### Structure description

The structure is the one suggested. The asymmetric unit contains one Re complex and one tetrahydrofuran solvent molecule in general positions.

Structure manipulation and figure generation were performed using Olex2<sup>4</sup> Unless noted otherwise all structural diagrams containing anisotropic displacement ellipsoids are drawn at the 50 % probability level.

Data collection, structure solution, and structure refinement were conducted at the X-ray Crystallographic Facility, B04 Hutchison Hall, Department of Chemistry, University of Rochester. The instrument was purchased with funding from NSF MRI program grant CHE-1725028. .

- 
- 1 *CrysAlisPro*, version 171.42.64a; Rigaku Corporation: Oxford, UK, 2022.
  - 2 Sheldrick, G. M. *SHELXT*, version 2018/2; *Acta. Crystallogr.* **2015**, *A71*, 3-8.
  - 3 Sheldrick, G. M. *SHELXL*, version 2019/2; *Acta. Crystallogr.* **2015**, *C71*, 3-8.
  - 4 Dolomanov, O. V.; Bourhis, L. J.; Gildea, R. J.; Howard, J. A. K.; Puschmann, H. *Olex2*, version 1.5; *J. Appl. Cryst.* **2009**, *42*, 339-341.

Some equations of interest:

$$R_{\text{int}} = \Sigma |F_{\text{O}}^2 - \langle F_{\text{O}}^2 \rangle| / \Sigma |F_{\text{O}}^2|$$

$$R1 = \Sigma ||F_{\text{O}}| - |F_{\text{C}}|| / \Sigma |F_{\text{O}}|$$

$$wR2 = [\Sigma [w(F_{\text{O}}^2 - F_{\text{C}}^2)^2] / \Sigma [w(F_{\text{O}}^2)^2]]^{1/2}$$

where  $w = 1 / [\sigma^2 (F_{\text{O}}^2) + (aP)^2 + bP]$  and

$$P = 1/3 \max (0, F_{\text{O}}^2) + 2/3 F_{\text{C}}^2$$

$$\text{GOF} = S = [\Sigma [w(F_{\text{O}}^2 - F_{\text{C}}^2)^2] / (m-n)]^{1/2}$$

where  $m$  = number of reflections and  $n$  = number of parameters



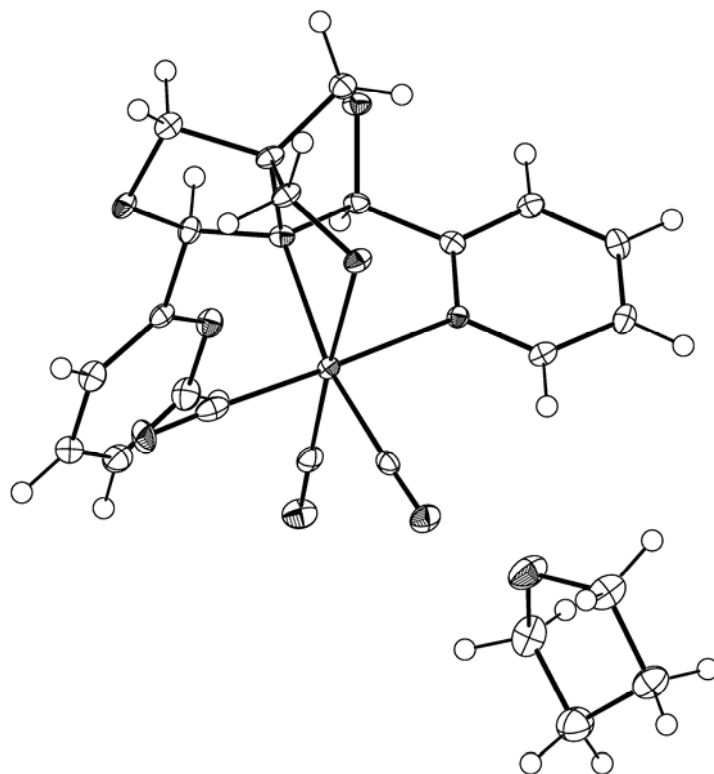

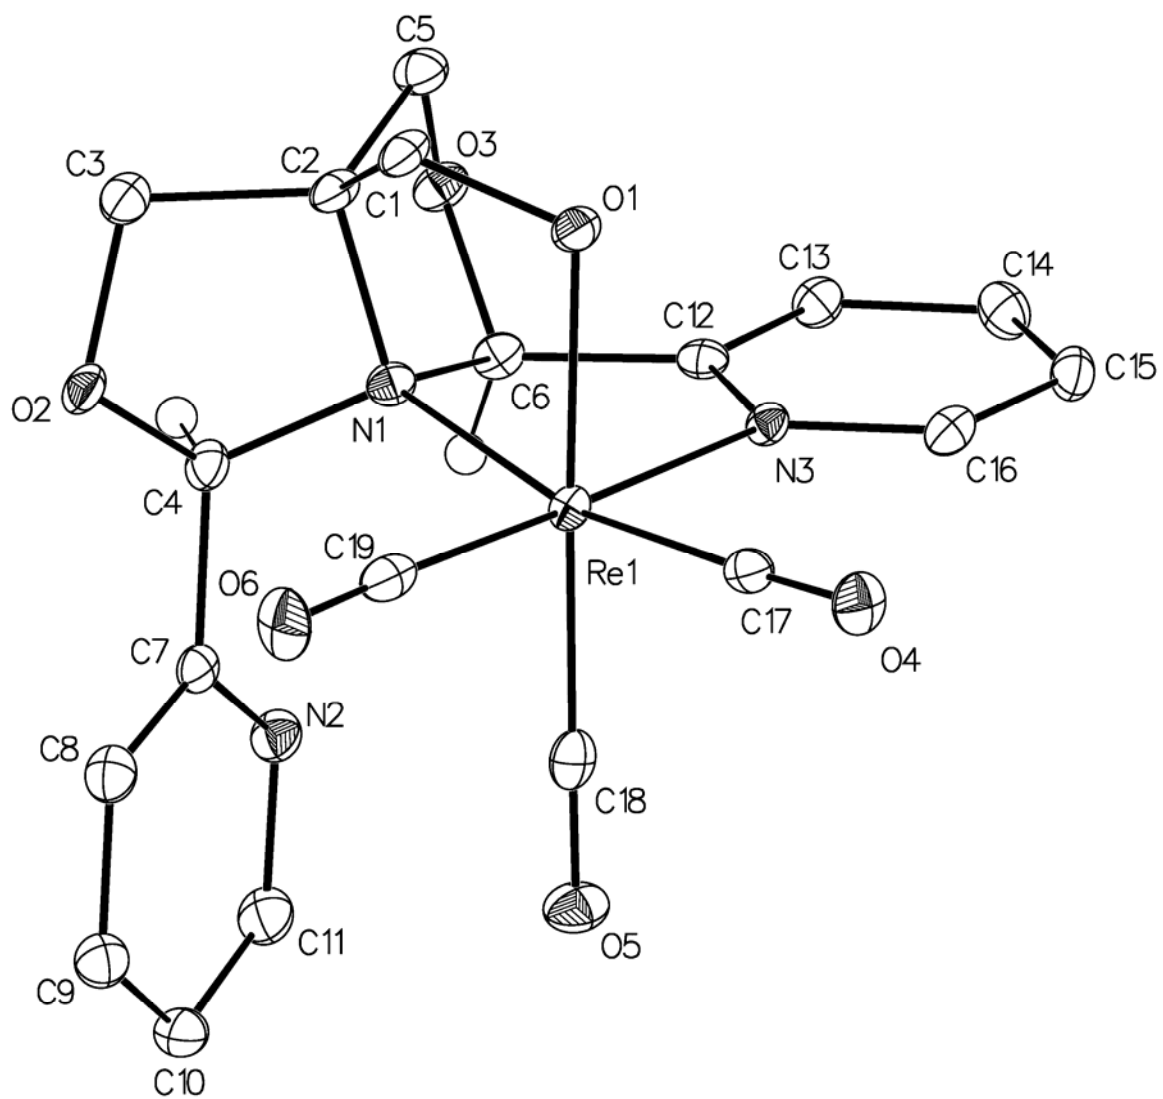

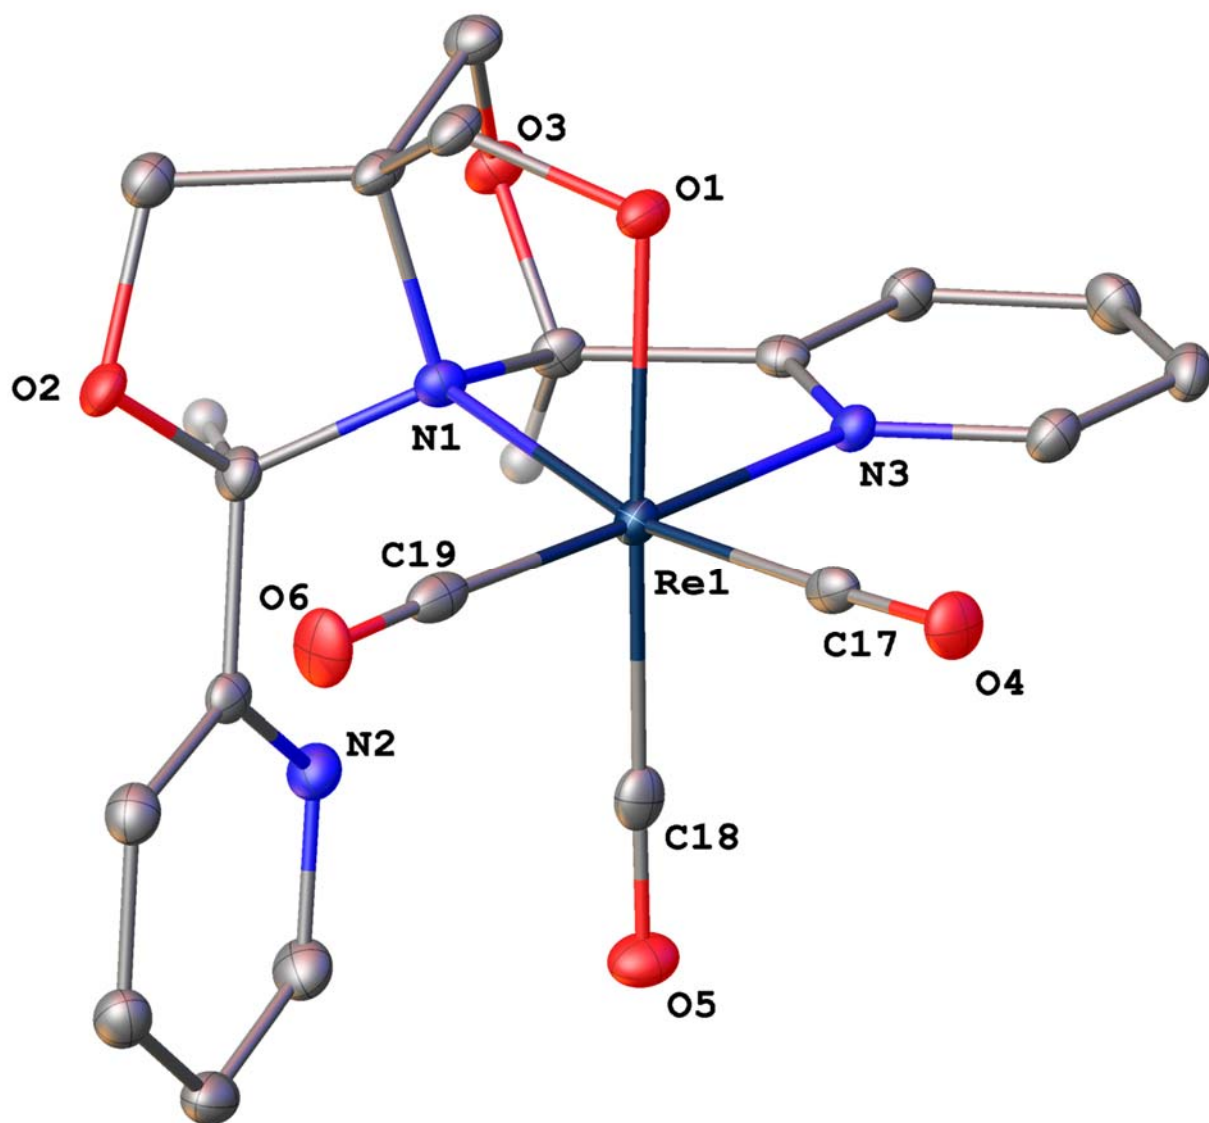

Table 1. Crystal data and structure refinement for **10**.

|                                                     |                                                                  |                             |
|-----------------------------------------------------|------------------------------------------------------------------|-----------------------------|
| Identification code                                 | jonrap11                                                         |                             |
| Empirical formula                                   | C <sub>23</sub> H <sub>24</sub> N <sub>3</sub> O <sub>7</sub> Re |                             |
| Formula weight                                      | 640.65                                                           |                             |
| Temperature                                         | 100.01(10) K                                                     |                             |
| Wavelength                                          | 1.54184 Å                                                        |                             |
| Crystal system                                      | monoclinic                                                       |                             |
| Space group                                         | <i>P</i> 2 <sub>1</sub> / <i>n</i>                               |                             |
| Unit cell dimensions                                | <i>a</i> = 14.08410(10) Å                                        | $\alpha = 90^\circ$         |
|                                                     | <i>b</i> = 10.35030(10) Å                                        | $\beta = 96.0510(10)^\circ$ |
|                                                     | <i>c</i> = 15.17250(10) Å                                        | $\gamma = 90^\circ$         |
| Volume                                              | 2199.44(3) Å <sup>3</sup>                                        |                             |
| <i>Z</i>                                            | 4                                                                |                             |
| Density (calculated)                                | 1.935 Mg/m <sup>3</sup>                                          |                             |
| Absorption coefficient                              | 11.263 mm <sup>-1</sup>                                          |                             |
| <i>F</i> (000)                                      | 1256                                                             |                             |
| Crystal color, morphology                           | pale yellow, block                                               |                             |
| Crystal size                                        | 0.145 x 0.118 x 0.038 mm <sup>3</sup>                            |                             |
| Theta range for data collection                     | 4.074 to 80.318°                                                 |                             |
| Index ranges                                        | -18 ≤ <i>h</i> ≤ 17, -11 ≤ <i>k</i> ≤ 13, -18 ≤ <i>l</i> ≤ 19    |                             |
| Reflections collected                               | 38647                                                            |                             |
| Independent reflections                             | 4762 [ <i>R</i> (int) = 0.0409]                                  |                             |
| Observed reflections                                | 4660                                                             |                             |
| Completeness to theta = 74.504°                     | 100.0%                                                           |                             |
| Absorption correction                               | Multi-scan                                                       |                             |
| Max. and min. transmission                          | 1.00000 and 0.44515                                              |                             |
| Refinement method                                   | Full-matrix least-squares on <i>F</i> <sup>2</sup>               |                             |
| Data / restraints / parameters                      | 4762 / 0 / 307                                                   |                             |
| Goodness-of-fit on <i>F</i> <sup>2</sup>            | 1.112                                                            |                             |
| Final <i>R</i> indices [ <i>I</i> > 2σ( <i>I</i> )] | <i>R</i> 1 = 0.0254, <i>wR</i> 2 = 0.0580                        |                             |
| <i>R</i> indices (all data)                         | <i>R</i> 1 = 0.0260, <i>wR</i> 2 = 0.0584                        |                             |
| Largest diff. peak and hole                         | 0.619 and -0.935 e.Å <sup>-3</sup>                               |                             |

Table 2. Atomic coordinates ( $\times 10^4$ ) and equivalent isotropic displacement parameters ( $\text{\AA}^2 \times 10^3$ ) for **10**.  $U_{\text{eq}}$  is defined as one third of the trace of the orthogonalized  $U_{ij}$  tensor.

|     | x        | y       | z       | $U_{\text{eq}}$ |
|-----|----------|---------|---------|-----------------|
| Re1 | 7454(1)  | 3968(1) | 4360(1) | 10(1)           |
| O1  | 8512(2)  | 3439(2) | 3553(2) | 14(1)           |
| O2  | 6391(2)  | 722(2)  | 3527(2) | 14(1)           |
| O4  | 7826(2)  | 6863(2) | 4197(2) | 18(1)           |
| O5  | 6033(2)  | 4586(2) | 5714(2) | 19(1)           |
| O3  | 8662(2)  | 306(2)  | 5060(2) | 14(1)           |
| O6  | 5786(2)  | 4324(3) | 2905(2) | 21(1)           |
| N1  | 7519(2)  | 1780(3) | 4482(2) | 12(1)           |
| N2  | 5942(2)  | 1306(3) | 5775(2) | 15(1)           |
| N3  | 8632(2)  | 3671(3) | 5388(2) | 10(1)           |
| C1  | 8243(2)  | 2320(3) | 3082(2) | 14(1)           |
| C2  | 8023(2)  | 1233(3) | 3708(2) | 13(1)           |
| C3  | 7286(2)  | 276(3)  | 3265(2) | 15(1)           |
| C4  | 6622(2)  | 934(3)  | 4435(2) | 13(1)           |
| C5  | 8910(2)  | 599(3)  | 4186(2) | 15(1)           |
| C6  | 8139(2)  | 1399(3) | 5298(2) | 12(1)           |
| C7  | 5806(2)  | 1457(3) | 4886(2) | 12(1)           |
| C8  | 4987(2)  | 1966(3) | 4441(2) | 16(1)           |
| C9  | 4255(3)  | 2345(3) | 4928(2) | 17(1)           |
| C10 | 4380(3)  | 2201(3) | 5842(2) | 18(1)           |
| C11 | 5225(3)  | 1678(4) | 6232(2) | 18(1)           |
| C12 | 8801(2)  | 2463(3) | 5675(2) | 11(1)           |
| C13 | 9531(2)  | 2173(3) | 6334(2) | 14(1)           |
| C14 | 10114(2) | 3158(3) | 6690(2) | 17(1)           |
| C15 | 9961(2)  | 4408(3) | 6382(2) | 15(1)           |
| C16 | 9207(2)  | 4632(3) | 5734(2) | 14(1)           |
| C17 | 7669(2)  | 5775(3) | 4265(2) | 13(1)           |
| C18 | 6555(2)  | 4347(3) | 5213(2) | 15(1)           |

|     |         |         |         |       |
|-----|---------|---------|---------|-------|
| C19 | 6412(3) | 4160(3) | 3445(2) | 16(1) |
| O7  | 7834(2) | 6780(3) | 6446(2) | 29(1) |
| C20 | 7306(3) | 7068(4) | 7175(3) | 26(1) |
| C21 | 7349(3) | 8534(4) | 7269(3) | 28(1) |
| C22 | 8372(3) | 8789(4) | 7078(2) | 23(1) |
| C23 | 8558(3) | 7744(4) | 6409(3) | 25(1) |

---

Table 3. Bond lengths [ $\text{\AA}$ ] and angles [ $^\circ$ ] for **10**.

|             |          |                 |          |
|-------------|----------|-----------------|----------|
| Re(1)-O(1)  | 2.097(2) | C(6)-H(6)       | 1.0000   |
| Re(1)-N(1)  | 2.273(3) | C(6)-C(12)      | 1.515(4) |
| Re(1)-N(3)  | 2.176(3) | C(7)-C(8)       | 1.378(5) |
| Re(1)-C(17) | 1.903(3) | C(8)-H(8)       | 0.9500   |
| Re(1)-C(18) | 1.945(3) | C(8)-C(9)       | 1.388(5) |
| Re(1)-C(19) | 1.922(4) | C(9)-H(9)       | 0.9500   |
| O(1)-C(1)   | 1.392(4) | C(9)-C(10)      | 1.388(5) |
| O(2)-C(3)   | 1.437(4) | C(10)-H(10)     | 0.9500   |
| O(2)-C(4)   | 1.400(4) | C(10)-C(11)     | 1.383(5) |
| O(4)-C(17)  | 1.154(4) | C(11)-H(11)     | 0.9500   |
| O(5)-C(18)  | 1.139(4) | C(12)-C(13)     | 1.390(5) |
| O(3)-C(5)   | 1.438(4) | C(13)-H(13)     | 0.9500   |
| O(3)-C(6)   | 1.417(4) | C(13)-C(14)     | 1.383(5) |
| O(6)-C(19)  | 1.151(4) | C(14)-H(14)     | 0.9500   |
| N(1)-C(2)   | 1.542(4) | C(14)-C(15)     | 1.385(5) |
| N(1)-C(4)   | 1.532(4) | C(15)-H(15)     | 0.9500   |
| N(1)-C(6)   | 1.491(4) | C(15)-C(16)     | 1.388(5) |
| N(2)-C(7)   | 1.351(4) | C(16)-H(16)     | 0.9500   |
| N(2)-C(11)  | 1.340(4) | O(7)-C(20)      | 1.429(5) |
| N(3)-C(12)  | 1.337(4) | O(7)-C(23)      | 1.433(5) |
| N(3)-C(16)  | 1.353(4) | C(20)-H(20A)    | 0.9900   |
| C(1)-H(1A)  | 0.9900   | C(20)-H(20B)    | 0.9900   |
| C(1)-H(1B)  | 0.9900   | C(20)-C(21)     | 1.524(6) |
| C(1)-C(2)   | 1.526(4) | C(21)-H(21A)    | 0.9900   |
| C(2)-C(3)   | 1.537(5) | C(21)-H(21B)    | 0.9900   |
| C(2)-C(5)   | 1.525(5) | C(21)-C(22)     | 1.522(6) |
| C(3)-H(3A)  | 0.9900   | C(22)-H(22A)    | 0.9900   |
| C(3)-H(3B)  | 0.9900   | C(22)-H(22B)    | 0.9900   |
| C(4)-H(4)   | 1.0000   | C(22)-C(23)     | 1.525(5) |
| C(4)-C(7)   | 1.499(4) | C(23)-H(23A)    | 0.9900   |
| C(5)-H(5A)  | 0.9900   | C(23)-H(23B)    | 0.9900   |
| C(5)-H(5B)  | 0.9900   | O(1)-Re(1)-N(1) | 76.30(9) |

|                   |            |                  |          |
|-------------------|------------|------------------|----------|
| O(1)-Re(1)-N(3)   | 81.22(9)   | C(1)-C(2)-C(3)   | 112.0(3) |
| N(3)-Re(1)-N(1)   | 77.32(10)  | C(3)-C(2)-N(1)   | 103.0(2) |
| C(17)-Re(1)-O(1)  | 94.85(11)  | C(5)-C(2)-N(1)   | 102.5(2) |
| C(17)-Re(1)-N(1)  | 168.62(12) | C(5)-C(2)-C(1)   | 113.8(3) |
| C(17)-Re(1)-N(3)  | 94.45(12)  | C(5)-C(2)-C(3)   | 114.4(3) |
| C(17)-Re(1)-C(18) | 88.34(14)  | O(2)-C(3)-C(2)   | 104.1(3) |
| C(17)-Re(1)-C(19) | 87.64(14)  | O(2)-C(3)-H(3A)  | 110.9    |
| C(18)-Re(1)-O(1)  | 173.54(12) | O(2)-C(3)-H(3B)  | 110.9    |
| C(18)-Re(1)-N(1)  | 99.79(12)  | C(2)-C(3)-H(3A)  | 110.9    |
| C(18)-Re(1)-N(3)  | 92.95(12)  | C(2)-C(3)-H(3B)  | 110.9    |
| C(19)-Re(1)-O(1)  | 98.12(12)  | H(3A)-C(3)-H(3B) | 108.9    |
| C(19)-Re(1)-N(1)  | 100.54(12) | O(2)-C(4)-N(1)   | 103.9(2) |
| C(19)-Re(1)-N(3)  | 177.85(12) | O(2)-C(4)-H(4)   | 107.7    |
| C(19)-Re(1)-C(18) | 87.61(14)  | O(2)-C(4)-C(7)   | 113.3(3) |
| C(1)-O(1)-Re(1)   | 110.19(19) | N(1)-C(4)-H(4)   | 107.7    |
| C(4)-O(2)-C(3)    | 101.7(2)   | C(7)-C(4)-N(1)   | 116.1(3) |
| C(6)-O(3)-C(5)    | 104.5(2)   | C(7)-C(4)-H(4)   | 107.7    |
| C(2)-N(1)-Re(1)   | 108.74(18) | O(3)-C(5)-C(2)   | 105.2(2) |
| C(4)-N(1)-Re(1)   | 122.71(19) | O(3)-C(5)-H(5A)  | 110.7    |
| C(4)-N(1)-C(2)    | 101.5(2)   | O(3)-C(5)-H(5B)  | 110.7    |
| C(6)-N(1)-Re(1)   | 110.23(19) | C(2)-C(5)-H(5A)  | 110.7    |
| C(6)-N(1)-C(2)    | 104.9(2)   | C(2)-C(5)-H(5B)  | 110.7    |
| C(6)-N(1)-C(4)    | 107.2(2)   | H(5A)-C(5)-H(5B) | 108.8    |
| C(11)-N(2)-C(7)   | 116.7(3)   | O(3)-C(6)-N(1)   | 105.9(2) |
| C(12)-N(3)-Re(1)  | 117.4(2)   | O(3)-C(6)-H(6)   | 108.6    |
| C(12)-N(3)-C(16)  | 118.9(3)   | O(3)-C(6)-C(12)  | 111.2(3) |
| C(16)-N(3)-Re(1)  | 123.7(2)   | N(1)-C(6)-H(6)   | 108.6    |
| O(1)-C(1)-H(1A)   | 109.5      | N(1)-C(6)-C(12)  | 113.9(3) |
| O(1)-C(1)-H(1B)   | 109.5      | C(12)-C(6)-H(6)  | 108.6    |
| O(1)-C(1)-C(2)    | 110.8(3)   | N(2)-C(7)-C(4)   | 112.3(3) |
| H(1A)-C(1)-H(1B)  | 108.1      | N(2)-C(7)-C(8)   | 123.8(3) |
| C(2)-C(1)-H(1A)   | 109.5      | C(8)-C(7)-C(4)   | 123.8(3) |
| C(2)-C(1)-H(1B)   | 109.5      | C(7)-C(8)-H(8)   | 120.7    |
| C(1)-C(2)-N(1)    | 110.1(3)   | C(7)-C(8)-C(9)   | 118.5(3) |



|                   |          |                     |          |
|-------------------|----------|---------------------|----------|
| C(9)-C(8)-H(8)    | 120.7    | O(6)-C(19)-Re(1)    | 177.4(3) |
| C(8)-C(9)-H(9)    | 120.7    | C(20)-O(7)-C(23)    | 108.4(3) |
| C(10)-C(9)-C(8)   | 118.6(3) | O(7)-C(20)-H(20A)   | 110.7    |
| C(10)-C(9)-H(9)   | 120.7    | O(7)-C(20)-H(20B)   | 110.7    |
| C(9)-C(10)-H(10)  | 120.6    | O(7)-C(20)-C(21)    | 105.1(3) |
| C(11)-C(10)-C(9)  | 118.9(3) | H(20A)-C(20)-H(20B) | 108.8    |
| C(11)-C(10)-H(10) | 120.6    | C(21)-C(20)-H(20A)  | 110.7    |
| N(2)-C(11)-C(10)  | 123.5(3) | C(21)-C(20)-H(20B)  | 110.7    |
| N(2)-C(11)-H(11)  | 118.2    | C(20)-C(21)-H(21A)  | 111.6    |
| C(10)-C(11)-H(11) | 118.2    | C(20)-C(21)-H(21B)  | 111.6    |
| N(3)-C(12)-C(6)   | 118.4(3) | H(21A)-C(21)-H(21B) | 109.4    |
| N(3)-C(12)-C(13)  | 121.9(3) | C(22)-C(21)-C(20)   | 100.7(3) |
| C(13)-C(12)-C(6)  | 119.6(3) | C(22)-C(21)-H(21A)  | 111.6    |
| C(12)-C(13)-H(13) | 120.5    | C(22)-C(21)-H(21B)  | 111.6    |
| C(14)-C(13)-C(12) | 119.1(3) | C(21)-C(22)-H(22A)  | 111.0    |
| C(14)-C(13)-H(13) | 120.5    | C(21)-C(22)-H(22B)  | 111.0    |
| C(13)-C(14)-H(14) | 120.3    | C(21)-C(22)-C(23)   | 103.7(3) |
| C(13)-C(14)-C(15) | 119.5(3) | H(22A)-C(22)-H(22B) | 109.0    |
| C(15)-C(14)-H(14) | 120.3    | C(23)-C(22)-H(22A)  | 111.0    |
| C(14)-C(15)-H(15) | 120.8    | C(23)-C(22)-H(22B)  | 111.0    |
| C(14)-C(15)-C(16) | 118.3(3) | O(7)-C(23)-C(22)    | 107.2(3) |
| C(16)-C(15)-H(15) | 120.8    | O(7)-C(23)-H(23A)   | 110.3    |
| N(3)-C(16)-C(15)  | 122.3(3) | O(7)-C(23)-H(23B)   | 110.3    |
| N(3)-C(16)-H(16)  | 118.8    | C(22)-C(23)-H(23A)  | 110.3    |
| C(15)-C(16)-H(16) | 118.8    | C(22)-C(23)-H(23B)  | 110.3    |
| O(4)-C(17)-Re(1)  | 177.8(3) | H(23A)-C(23)-H(23B) | 108.5    |
| O(5)-C(18)-Re(1)  | 179.1(3) |                     |          |

Table 4. Anisotropic displacement parameters ( $\text{\AA}^2 \times 10^3$ ) for **10**. The anisotropic displacement factor exponent takes the form:  $-2\pi^2 [ h^2 a^{*2} U_{11} + \dots + 2 h k a^* b^* U_{12} ]$

|     | U <sub>11</sub> | U <sub>22</sub> | U <sub>33</sub> | U <sub>23</sub> | U <sub>13</sub> | U <sub>12</sub> |
|-----|-----------------|-----------------|-----------------|-----------------|-----------------|-----------------|
| Re1 | 12(1)           | 9(1)            | 8(1)            | 0(1)            | 1(1)            | 0(1)            |
| O1  | 16(1)           | 12(1)           | 14(1)           | -2(1)           | 5(1)            | -1(1)           |
| O2  | 17(1)           | 14(1)           | 10(1)           | -4(1)           | 1(1)            | -2(1)           |
| O4  | 22(1)           | 10(1)           | 22(1)           | 3(1)            | 2(1)            | -2(1)           |
| O5  | 23(1)           | 20(1)           | 17(1)           | 1(1)            | 9(1)            | 0(1)            |
| O3  | 18(1)           | 12(1)           | 13(1)           | 0(1)            | 1(1)            | 4(1)            |
| O6  | 20(1)           | 22(1)           | 18(1)           | 2(1)            | -10(1)          | 1(1)            |
| N1  | 13(1)           | 10(1)           | 11(1)           | 1(1)            | 2(1)            | 1(1)            |
| N2  | 17(1)           | 17(1)           | 12(1)           | -1(1)           | 2(1)            | -2(1)           |
| N3  | 12(1)           | 11(1)           | 8(1)            | -1(1)           | 0(1)            | 1(1)            |
| C1  | 20(2)           | 12(2)           | 12(2)           | -3(1)           | 5(1)            | -1(1)           |
| C2  | 17(2)           | 10(2)           | 12(1)           | -2(1)           | 6(1)            | -1(1)           |
| C3  | 18(2)           | 14(2)           | 14(2)           | -1(1)           | 3(1)            | -1(1)           |
| C4  | 15(2)           | 15(2)           | 10(1)           | -2(1)           | 0(1)            | -2(1)           |
| C5  | 16(2)           | 17(2)           | 12(2)           | -2(1)           | 2(1)            | 2(1)            |
| C6  | 14(2)           | 10(1)           | 11(1)           | 2(1)            | 1(1)            | 3(1)            |
| C7  | 15(2)           | 9(1)            | 13(2)           | 0(1)            | 4(1)            | -3(1)           |
| C8  | 19(2)           | 17(2)           | 14(2)           | 0(1)            | 2(1)            | -3(1)           |
| C9  | 17(2)           | 16(2)           | 19(2)           | -1(1)           | 1(1)            | 1(1)            |
| C10 | 17(2)           | 18(2)           | 22(2)           | -4(1)           | 7(1)            | -2(1)           |
| C11 | 20(2)           | 22(2)           | 12(2)           | -2(1)           | 3(1)            | -3(1)           |
| C12 | 12(2)           | 14(2)           | 9(1)            | 1(1)            | 3(1)            | 2(1)            |
| C13 | 16(2)           | 12(2)           | 15(2)           | 0(1)            | 2(1)            | 1(1)            |
| C14 | 14(2)           | 20(2)           | 16(2)           | 1(1)            | -2(1)           | 0(1)            |
| C15 | 16(2)           | 17(2)           | 13(2)           | -3(1)           | 1(1)            | -4(1)           |
| C16 | 18(2)           | 12(2)           | 14(2)           | -2(1)           | 3(1)            | 0(1)            |
| C17 | 11(2)           | 17(2)           | 10(1)           | -1(1)           | -1(1)           | 4(1)            |
| C18 | 19(2)           | 9(2)            | 17(2)           | 1(1)            | -1(1)           | -2(1)           |

|     |       |       |       |       |       |       |
|-----|-------|-------|-------|-------|-------|-------|
| C19 | 22(2) | 10(2) | 17(2) | 0(1)  | 10(1) | -1(1) |
| O7  | 33(2) | 20(1) | 35(2) | -6(1) | 13(1) | -7(1) |
| C20 | 32(2) | 27(2) | 20(2) | 2(2)  | 3(2)  | -8(2) |
| C21 | 28(2) | 27(2) | 31(2) | -5(2) | 7(2)  | 0(2)  |
| C22 | 33(2) | 17(2) | 19(2) | 1(1)  | 3(2)  | -1(2) |
| C23 | 33(2) | 20(2) | 22(2) | 0(2)  | 10(2) | -5(2) |

---

Table 5. Hydrogen coordinates ( $\times 10^4$ ) and isotropic displacement parameters ( $\text{\AA}^2 \times 10^3$ ) for **10**.

|      | x     | y    | z    | U(eq) |
|------|-------|------|------|-------|
| H1A  | 8765  | 2048 | 2734 | 17    |
| H1B  | 7671  | 2499 | 2663 | 17    |
| H3A  | 7282  | 296  | 2612 | 18    |
| H3B  | 7425  | -615 | 3478 | 18    |
| H4   | 6810  | 85   | 4716 | 16    |
| H5A  | 9074  | -199 | 3876 | 18    |
| H5B  | 9462  | 1196 | 4217 | 18    |
| H6   | 7722  | 1133 | 5760 | 14    |
| H8   | 4926  | 2055 | 3814 | 20    |
| H9   | 3680  | 2697 | 4642 | 21    |
| H10  | 3893  | 2457 | 6194 | 22    |
| H11  | 5302  | 1578 | 6858 | 22    |
| H13  | 9629  | 1310 | 6536 | 17    |
| H14  | 10615 | 2978 | 7144 | 20    |
| H15  | 10363 | 5096 | 6608 | 18    |
| H16  | 9091  | 5489 | 5526 | 17    |
| H20A | 7597  | 6644 | 7723 | 32    |
| H20B | 6636  | 6772 | 7053 | 32    |
| H21A | 6883  | 8965 | 6831 | 34    |
| H21B | 7240  | 8813 | 7874 | 34    |
| H22A | 8820  | 8710 | 7623 | 27    |
| H22B | 8435  | 9662 | 6823 | 27    |
| H23A | 8529  | 8116 | 5805 | 30    |
| H23B | 9199  | 7360 | 6560 | 30    |

Table 6. Torsion angles [°] for **10**.

|                |             |                 |           |
|----------------|-------------|-----------------|-----------|
| Re1-O1-C1-C2   | -55.5(3)    | C4-N1-C2-C1     | 126.3(3)  |
| Re1-N1-C2-C1   | -4.3(3)     | C4-N1-C2-C3     | 6.7(3)    |
| Re1-N1-C2-C3   | -123.9(2)   | C4-N1-C2-C5     | -112.3(3) |
| Re1-N1-C2-C5   | 117.1(2)    | C4-N1-C6-O3     | 83.7(3)   |
| Re1-N1-C4-O2   | 86.0(3)     | C4-N1-C6-C12    | -153.9(3) |
| Re1-N1-C4-C7   | -39.1(3)    | C4-C7-C8-C9     | 176.0(3)  |
| Re1-N1-C6-O3   | -140.56(19) | C5-O3-C6-N1     | 40.2(3)   |
| Re1-N1-C6-C12  | -18.1(3)    | C5-O3-C6-C12    | -84.0(3)  |
| Re1-N3-C12-C6  | -2.7(4)     | C5-C2-C3-O2     | 133.2(3)  |
| Re1-N3-C12-C13 | -179.6(2)   | C6-O3-C5-C2     | -40.6(3)  |
| Re1-N3-C16-C15 | -179.1(2)   | C6-N1-C2-C1     | -122.2(3) |
| O1-C1-C2-N1    | 37.6(4)     | C6-N1-C2-C3     | 118.2(3)  |
| O1-C1-C2-C3    | 151.5(3)    | C6-N1-C2-C5     | -0.8(3)   |
| O1-C1-C2-C5    | -76.8(3)    | C6-N1-C4-O2     | -145.0(2) |
| O2-C4-C7-N2    | 162.0(3)    | C6-N1-C4-C7     | 89.8(3)   |
| O2-C4-C7-C8    | -14.5(5)    | C6-C12-C13-C14  | -178.2(3) |
| O3-C6-C12-N3   | 134.1(3)    | C7-N2-C11-C10   | -0.3(5)   |
| O3-C6-C12-C13  | -48.9(4)    | C7-C8-C9-C10    | 0.3(5)    |
| N1-C2-C3-O2    | 22.8(3)     | C8-C9-C10-C11   | -0.4(5)   |
| N1-C2-C5-O3    | 24.6(3)     | C9-C10-C11-N2   | 0.4(6)    |
| N1-C4-C7-N2    | -77.8(3)    | C11-N2-C7-C4    | -176.3(3) |
| N1-C4-C7-C8    | 105.7(4)    | C11-N2-C7-C8    | 0.2(5)    |
| N1-C6-C12-N3   | 14.6(4)     | C12-N3-C16-C15  | -0.6(5)   |
| N1-C6-C12-C13  | -168.5(3)   | C12-C13-C14-C15 | -0.4(5)   |
| N2-C7-C8-C9    | -0.1(5)     | C13-C14-C15-C16 | 1.5(5)    |
| N3-C12-C13-C14 | -1.4(5)     | C14-C15-C16-N3  | -1.1(5)   |
| C1-C2-C3-O2    | -95.5(3)    | C16-N3-C12-C6   | 178.7(3)  |
| C1-C2-C5-O3    | 143.4(3)    | C16-N3-C12-C13  | 1.8(4)    |
| C2-N1-C4-O2    | -35.3(3)    | O7-C20-C21-C22  | -38.7(4)  |
| C2-N1-C4-C7    | -160.4(3)   | C20-O7-C23-C22  | -8.3(4)   |
| C2-N1-C6-O3    | -23.6(3)    | C20-C21-C22-C23 | 32.7(4)   |
| C2-N1-C6-C12   | 98.8(3)     | C21-C22-C23-O7  | -16.5(4)  |
| C3-O2-C4-N1    | 51.2(3)     | C23-O7-C20-C21  | 29.9(4)   |
| C3-O2-C4-C7    | 178.1(3)    |                 |           |
| C3-C2-C5-O3    | -86.2(3)    |                 |           |
| C4-O2-C3-C2    | -46.2(3)    |                 |           |

REFERENCE NUMBER: jonrap12

## CRYSTAL STRUCTURE REPORT

C<sub>19</sub> H<sub>16</sub> N<sub>3</sub> O<sub>6</sub> Re

or

 $(\kappa^3\text{-}N,N',O\text{-}L1^{\text{meso-H}})\text{Re}(\text{CO})_3$ **(10b)*****Second Polymorph***

Report prepared for:

R. Pohorenc, Prof. W. Jones

December 16, 2022

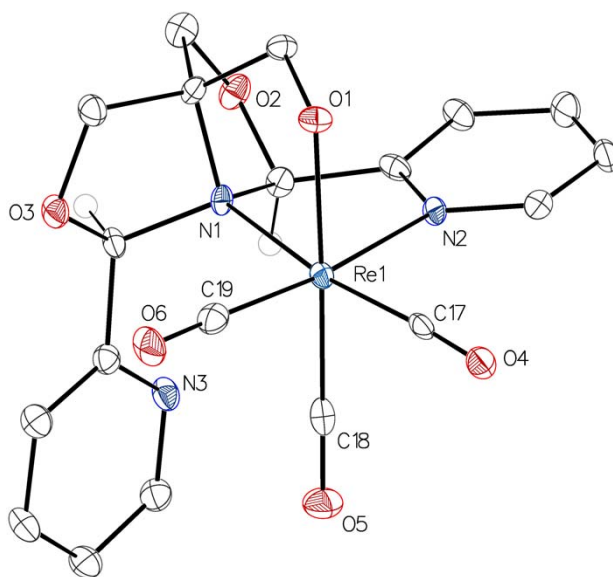

William W. Brennessel

X-ray Crystallographic Facility

Department of Chemistry, University of Rochester

120 Trustee Road

Rochester, NY 14627

### Data collection

A crystal (0.105 x 0.053 x 0.023 mm<sup>3</sup>) was placed onto a thin glass optical fiber or a nylon loop and mounted on a Rigaku XtaLAB Synergy-S Dualflex diffractometer equipped with a HyPix-6000HE HPC area detector for data collection at 100.00(10) K. A preliminary set of cell constants and an orientation matrix were calculated from a small sampling of reflections.<sup>1</sup> A short pre-experiment was run, from which an optimal data collection strategy was determined. The full data collection was carried out using a PhotonJet (Cu) X-ray source with frame times of 0.06 and 0.22 seconds and a detector distance of 34.0 mm. Series of frames were collected in 0.50° steps in  $\omega$  at different  $2\theta$ ,  $\kappa$ , and  $\phi$  settings. After the intensity data were corrected for absorption, the final cell constants were calculated from the xyz centroids of 37583 strong reflections from the actual data collection after integration.<sup>1</sup> See Table 1 for additional crystal and refinement information.

### Structure solution and refinement

The structure was solved using SHELXT<sup>2</sup> and refined using SHELXL.<sup>3</sup> The space group *P*-1 was determined based on intensity statistics. Most or all non-hydrogen atoms were assigned from the solution. Full-matrix least squares / difference Fourier cycles were performed which located any remaining non-hydrogen atoms. All non-hydrogen atoms were refined with anisotropic displacement parameters. All hydrogen atoms were placed in ideal positions and refined as riding atoms with relative isotropic displacement parameters. The final full matrix least squares refinement converged to  $R1 = 0.0259$  ( $F^2$ ,  $I > 2\sigma(I)$ ) and  $wR2 = 0.0678$  ( $F^2$ , all data).

### Structure description

The structure is the one suggested. The asymmetric unit contains two molecules in general positions. The -CH<sub>2</sub>- (i.e., methylene) region of molecule Re2 is modeled as disordered over two positions (0.82:0.18).

Structure manipulation and figure generation were performed using Olex2.<sup>4</sup> Unless noted otherwise all structural diagrams containing anisotropic displacement ellipsoids are drawn at the 50 % probability level.

Data collection, structure solution, and structure refinement were conducted at the X-ray Crystallographic Facility, B04 Hutchison Hall, Department of Chemistry, University of Rochester. The instrument was purchased with funding from NSF MRI program grant CHE-1725028.

- 
- 1 *CrysAlisPro*, version 171.42.72a; Rigaku Corporation: Oxford, UK, 2022.
  - 2 Sheldrick, G. M. *SHELXT*, version 2018/2; *Acta. Crystallogr.* **2015**, *A71*, 3-8.
  - 3 Sheldrick, G. M. *SHELXL*, version 2019/2; *Acta. Crystallogr.* **2015**, *C71*, 3-8.
  - 4 Dolomanov, O. V.; Bourhis, L. J.; Gildea, R. J.; Howard, J. A. K.; Puschmann, H. *Olex2*, version 1.5; *J. Appl. Cryst.* **2009**, *42*, 339-341.

Some equations of interest:

$$R_{\text{int}} = \Sigma |F_{\text{O}}^2 - \langle F_{\text{O}}^2 \rangle| / \Sigma |F_{\text{O}}^2|$$

$$R1 = \Sigma ||F_{\text{O}}| - |F_{\text{C}}|| / \Sigma |F_{\text{O}}|$$

$$wR2 = [\Sigma [w(F_{\text{O}}^2 - F_{\text{C}}^2)^2] / \Sigma [w(F_{\text{O}}^2)^2]]^{1/2}$$

where  $w = 1 / [\sigma^2 (F_{\text{O}}^2) + (aP)^2 + bP]$  and

$$P = 1/3 \max (0, F_{\text{O}}^2) + 2/3 F_{\text{C}}^2$$

$$\text{GOF} = S = [\Sigma [w(F_{\text{O}}^2 - F_{\text{C}}^2)^2] / (m-n)]^{1/2}$$

where  $m$  = number of reflections and  $n$  = number of parameters



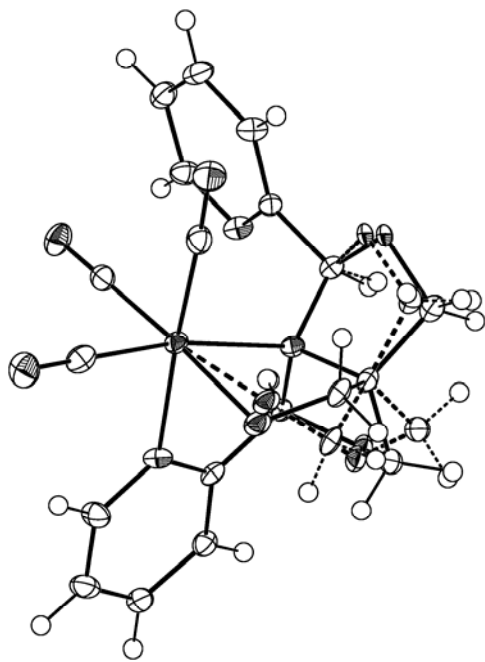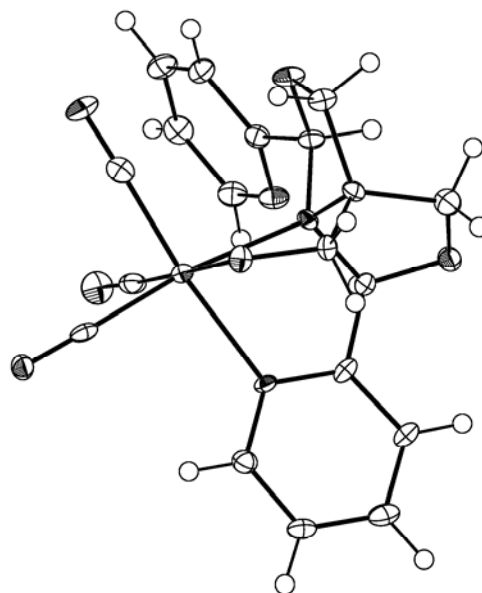

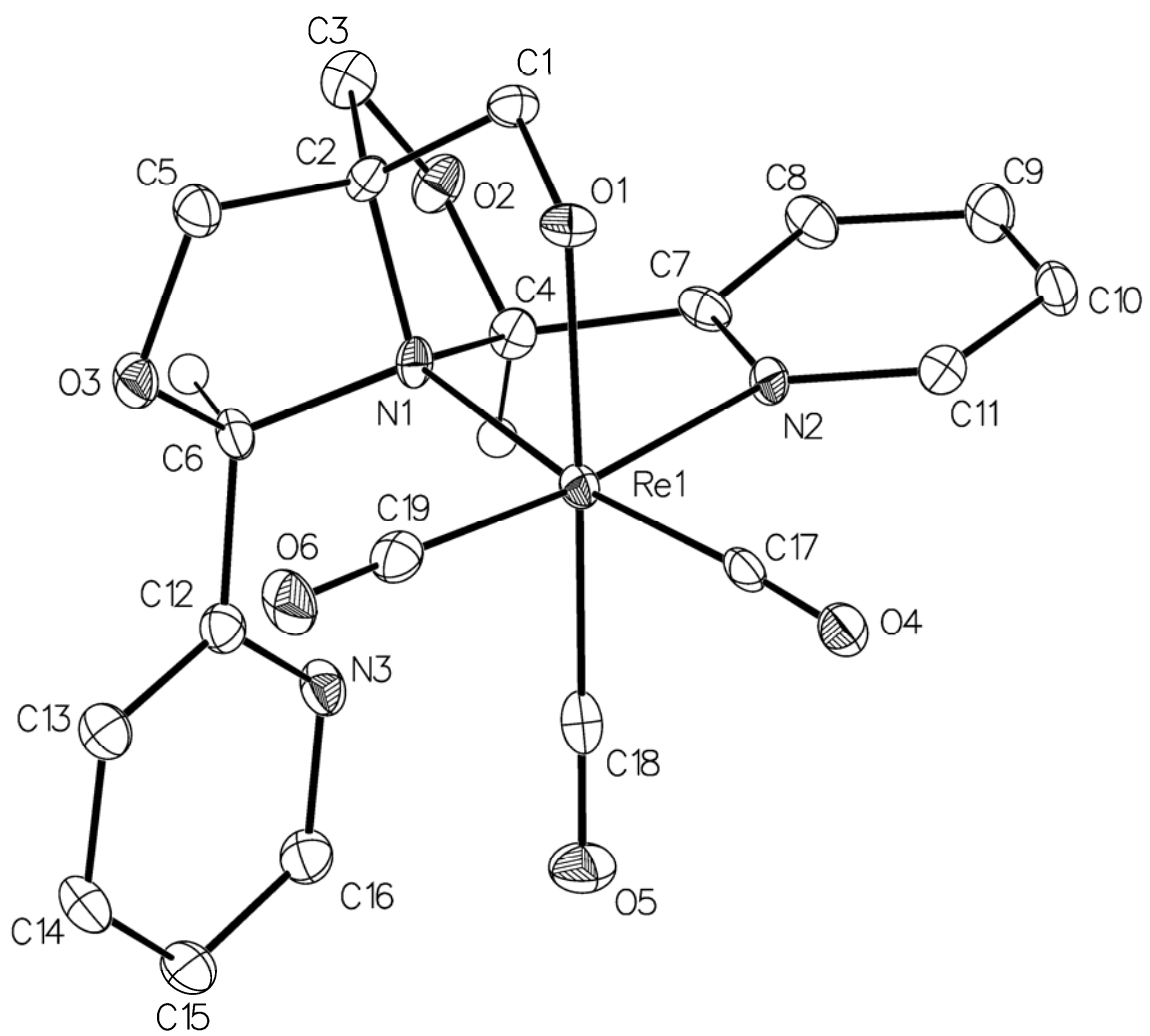

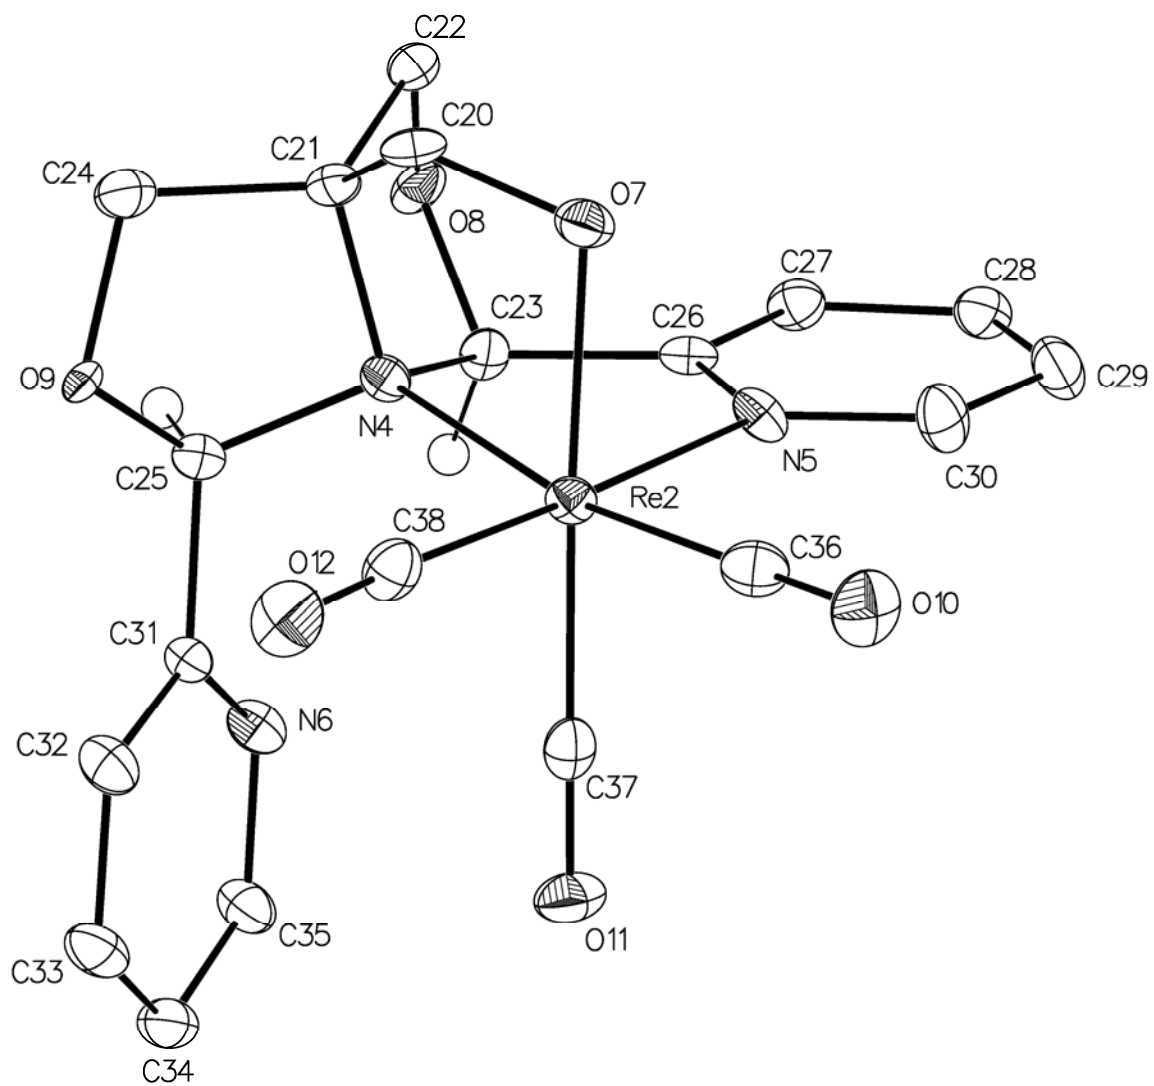

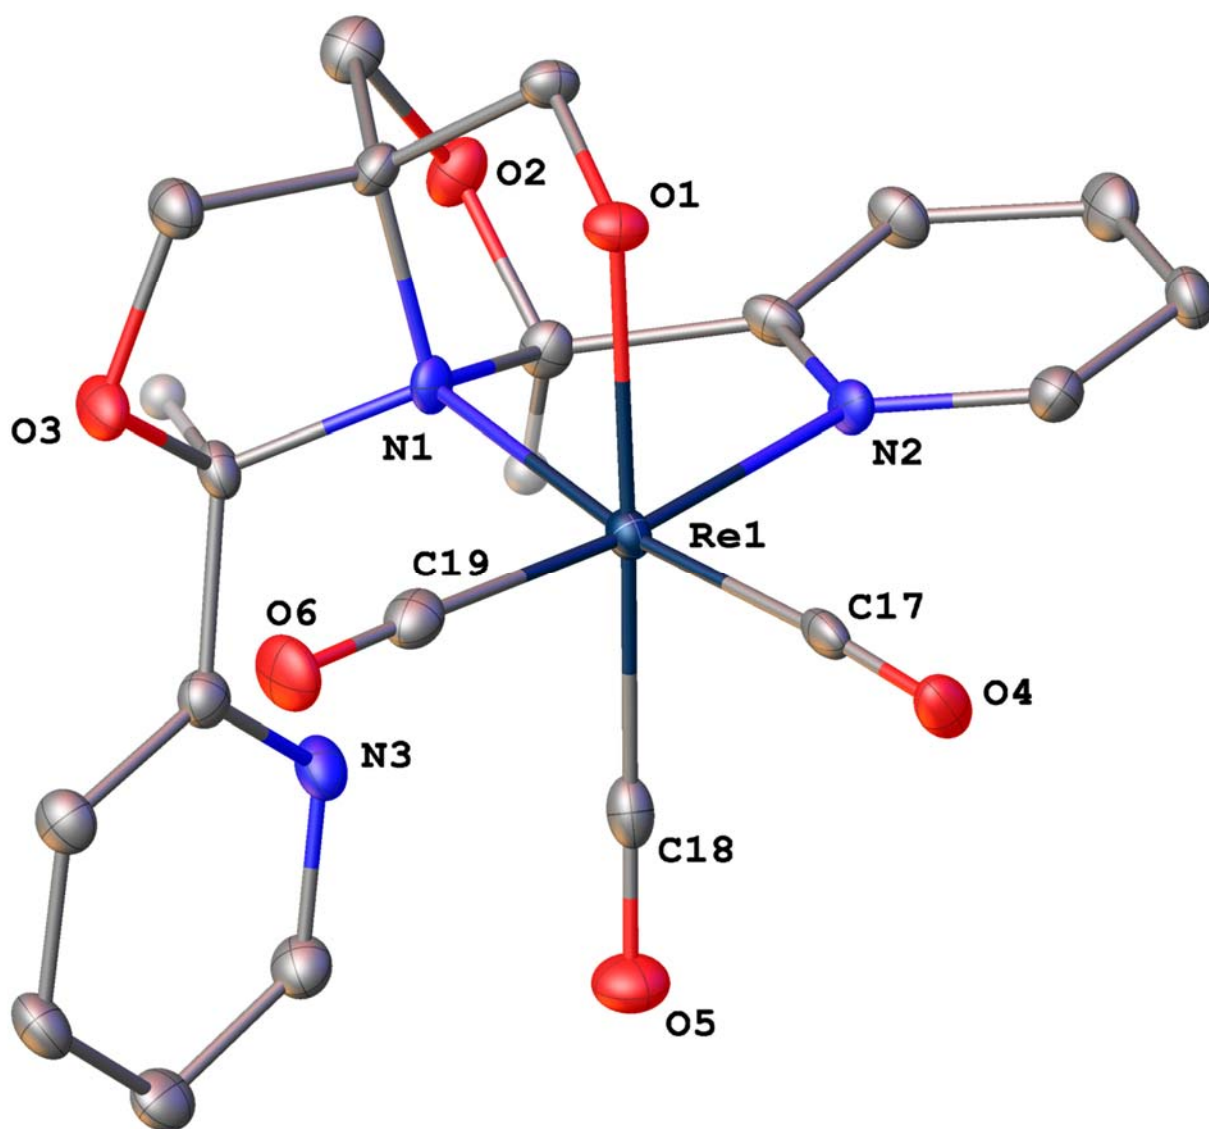

Table 1. Crystal data and structure refinement for **10**.

|                                                     |                                                                  |                         |
|-----------------------------------------------------|------------------------------------------------------------------|-------------------------|
| Identification code                                 | jonrap12                                                         |                         |
| Empirical formula                                   | C <sub>19</sub> H <sub>16</sub> N <sub>3</sub> O <sub>6</sub> Re |                         |
| Formula weight                                      | 568.55                                                           |                         |
| Temperature                                         | 100.00(10) K                                                     |                         |
| Wavelength                                          | 1.54184 Å                                                        |                         |
| Crystal system                                      | triclinic                                                        |                         |
| Space group                                         | <i>P</i> -1                                                      |                         |
| Unit cell dimensions                                | <i>a</i> = 10.03030(10) Å                                        | $\alpha$ = 81.8090(10)° |
|                                                     | <i>b</i> = 10.4951(2) Å                                          | $\beta$ = 81.8630(10)°  |
|                                                     | <i>c</i> = 17.6513(2) Å                                          | $\gamma$ = 81.9800(10)° |
| Volume                                              | 1807.11(4) Å <sup>3</sup>                                        |                         |
| <i>Z</i>                                            | 4                                                                |                         |
| Density (calculated)                                | 2.090 Mg/m <sup>3</sup>                                          |                         |
| Absorption coefficient                              | 13.560 mm <sup>-1</sup>                                          |                         |
| <i>F</i> (000)                                      | 1096                                                             |                         |
| Crystal color, morphology                           | colourless, block                                                |                         |
| Crystal size                                        | 0.105 x 0.053 x 0.023 mm <sup>3</sup>                            |                         |
| Theta range for data collection                     | 4.288 to 80.228°                                                 |                         |
| Index ranges                                        | -12 ≤ <i>h</i> ≤ 12, -13 ≤ <i>k</i> ≤ 12, -22 ≤ <i>l</i> ≤ 22    |                         |
| Reflections collected                               | 61205                                                            |                         |
| Independent reflections                             | 7771 [ <i>R</i> (int) = 0.0466]                                  |                         |
| Observed reflections                                | 7396                                                             |                         |
| Completeness to theta = 74.504°                     | 99.7%                                                            |                         |
| Absorption correction                               | Multi-scan                                                       |                         |
| Max. and min. transmission                          | 1.00000 and 0.79636                                              |                         |
| Refinement method                                   | Full-matrix least-squares on <i>F</i> <sup>2</sup>               |                         |
| Data / restraints / parameters                      | 7771 / 57 / 578                                                  |                         |
| Goodness-of-fit on <i>F</i> <sup>2</sup>            | 1.134                                                            |                         |
| Final <i>R</i> indices [ <i>I</i> > 2σ( <i>I</i> )] | <i>R</i> 1 = 0.0259, <i>wR</i> 2 = 0.0670                        |                         |
| <i>R</i> indices (all data)                         | <i>R</i> 1 = 0.0273, <i>wR</i> 2 = 0.0678                        |                         |
| Largest diff. peak and hole                         | 0.913 and -1.316 e.Å <sup>-3</sup>                               |                         |

Table 2. Atomic coordinates ( $\times 10^4$ ) and equivalent isotropic displacement parameters ( $\text{\AA}^2 \times 10^3$ ) for **10**.  $U_{\text{eq}}$  is defined as one third of the trace of the orthogonalized  $U_{ij}$  tensor.

|     | x        | y        | z       | $U_{\text{eq}}$ |
|-----|----------|----------|---------|-----------------|
| Re1 | 8028(1)  | 3271(1)  | 5430(1) | 11(1)           |
| Re2 | 8752(1)  | 2592(1)  | 663(1)  | 13(1)           |
| O7  | 9672(5)  | 3848(4)  | 1180(2) | 18(1)           |
| O8  | 5922(11) | 4627(10) | 2229(6) | 17(2)           |
| O9  | 7684(4)  | 1281(4)  | 2760(2) | 18(1)           |
| O10 | 10739(3) | 2686(3)  | -823(2) | 28(1)           |
| O11 | 7093(3)  | 1006(3)  | -106(2) | 23(1)           |
| O12 | 10327(3) | -14(3)   | 1212(2) | 31(1)           |
| N4  | 7321(3)  | 2897(3)  | 1747(2) | 13(1)           |
| N5  | 7545(3)  | 4423(3)  | 329(2)  | 16(1)           |
| N6  | 5045(3)  | 1190(3)  | 1602(2) | 19(1)           |
| C20 | 9567(4)  | 3482(5)  | 1968(3) | 17(1)           |
| C21 | 8072(4)  | 3438(4)  | 2311(2) | 15(1)           |
| C22 | 7287(5)  | 4766(5)  | 2391(3) | 16(1)           |
| C23 | 6175(4)  | 3932(3)  | 1576(2) | 14(1)           |
| C24 | 7952(6)  | 2427(5)  | 3029(3) | 20(1)           |
| C25 | 6714(4)  | 1786(4)  | 2275(2) | 17(1)           |
| C26 | 6477(4)  | 4802(3)  | 829(2)  | 14(1)           |
| C27 | 5601(4)  | 5921(4)  | 663(2)  | 16(1)           |
| C28 | 5856(4)  | 6685(4)  | -33(2)  | 19(1)           |
| C29 | 6992(4)  | 6326(4)  | -542(2) | 21(1)           |
| C30 | 7811(4)  | 5190(4)  | -342(2) | 21(1)           |
| C31 | 6244(4)  | 790(4)   | 1875(2) | 15(1)           |
| C32 | 6939(4)  | -434(4)  | 1833(2) | 20(1)           |
| C33 | 6377(4)  | -1310(4) | 1492(2) | 21(1)           |
| C34 | 5155(4)  | -918(4)  | 1197(2) | 19(1)           |
| C35 | 4536(4)  | 336(4)   | 1262(2) | 19(1)           |
| C36 | 10004(4) | 2643(4)  | -267(2) | 20(1)           |
| C37 | 7704(4)  | 1601(4)  | 186(2)  | 18(1)           |
| C38 | 9748(4)  | 976(4)   | 1023(2) | 20(1)           |

|      |          |          |          |       |
|------|----------|----------|----------|-------|
| O4   | 8999(3)  | 4440(3)  | 3792(2)  | 18(1) |
| O6   | 8532(3)  | 609(3)   | 4845(2)  | 23(1) |
| O5   | 5303(3)  | 3596(3)  | 4772(2)  | 23(1) |
| O1   | 9894(2)  | 2978(3)  | 5890(2)  | 15(1) |
| O2   | 6956(3)  | 3441(3)  | 7868(2)  | 18(1) |
| O3   | 7590(3)  | 431(2)   | 6776(2)  | 18(1) |
| N1   | 7367(3)  | 2647(3)  | 6675(2)  | 12(1) |
| N2   | 7723(3)  | 5075(3)  | 5964(2)  | 12(1) |
| N3   | 4441(3)  | 2495(3)  | 6549(2)  | 16(1) |
| C12  | 5393(4)  | 1467(4)  | 6480(2)  | 14(1) |
| C9   | 7507(4)  | 7218(4)  | 6762(2)  | 19(1) |
| C7   | 7213(4)  | 5002(4)  | 6717(2)  | 14(1) |
| C14  | 4023(4)  | 393(4)   | 5839(2)  | 19(1) |
| C11  | 8122(4)  | 6207(4)  | 5608(2)  | 16(1) |
| C17  | 8677(4)  | 4003(3)  | 4417(2)  | 14(1) |
| C8   | 7109(4)  | 6054(4)  | 7135(2)  | 16(1) |
| C19  | 8347(4)  | 1598(4)  | 5072(2)  | 17(1) |
| C10  | 8013(4)  | 7299(4)  | 5987(2)  | 17(1) |
| C5   | 8843(4)  | 733(4)   | 6972(2)  | 16(1) |
| C6   | 6599(3)  | 1486(3)  | 6899(2)  | 13(1) |
| C13  | 5242(4)  | 412(4)   | 6124(2)  | 17(1) |
| C1   | 9775(4)  | 2914(4)  | 6684(2)  | 13(1) |
| C15  | 3035(4)  | 1451(4)  | 5901(2)  | 19(1) |
| C2   | 8613(4)  | 2177(3)  | 7080(2)  | 13(1) |
| C18  | 6292(4)  | 3498(3)  | 5049(2)  | 16(1) |
| C3   | 8149(4)  | 2491(4)  | 7907(2)  | 18(1) |
| C4   | 6696(4)  | 3751(3)  | 7082(2)  | 14(1) |
| C16  | 3303(4)  | 2478(4)  | 6241(2)  | 18(1) |
| O9A  | 7910(20) | 1229(19) | 2582(15) | 19(2) |
| C24A | 8530(30) | 2238(17) | 2829(14) | 20(2) |
| C22A | 6888(19) | 4340(20) | 2706(12) | 17(2) |
| O8A  | 5940(50) | 4780(60) | 2150(30) | 17(3) |
| C20A | 9098(19) | 4253(19) | 1819(10) | 16(2) |
| O7A  | 9890(20) | 3510(20) | 1292(12) | 17(2) |

Table 3. Bond lengths [Å] and angles [°] for **10**.

|              |           |              |           |
|--------------|-----------|--------------|-----------|
| Re(1)-O(1)   | 2.110(2)  | C(21)-C(24)  | 1.535(6)  |
| Re(1)-N(1)   | 2.234(3)  | C(21)-C(24A) | 1.505(16) |
| Re(1)-N(2)   | 2.197(3)  | C(21)-C(22A) | 1.558(15) |
| Re(1)-C(17)  | 1.905(4)  | C(21)-C(20A) | 1.524(15) |
| Re(1)-C(19)  | 1.920(4)  | C(22)-H(22A) | 0.9900    |
| Re(1)-C(18)  | 1.926(4)  | C(22)-H(22B) | 0.9900    |
| Re(2)-O(7)   | 2.083(4)  | C(23)-H(23)  | 1.0000    |
| Re(2)-N(4)   | 2.256(3)  | C(23)-H(23A) | 1.0000    |
| Re(2)-N(5)   | 2.176(3)  | C(23)-C(26)  | 1.511(5)  |
| Re(2)-C(36)  | 1.921(4)  | C(23)-O(8A)  | 1.412(17) |
| Re(2)-C(37)  | 1.925(4)  | C(24)-H(24A) | 0.9900    |
| Re(2)-C(38)  | 1.918(4)  | C(24)-H(24B) | 0.9900    |
| Re(2)-O(7A)  | 2.106(16) | C(25)-H(25)  | 1.0000    |
| O(7)-C(20)   | 1.383(6)  | C(25)-H(25A) | 1.0000    |
| O(8)-C(22)   | 1.468(11) | C(25)-C(31)  | 1.501(5)  |
| O(8)-C(23)   | 1.424(6)  | C(25)-O(9A)  | 1.409(17) |
| O(9)-C(24)   | 1.426(6)  | C(26)-C(27)  | 1.387(5)  |
| O(9)-C(25)   | 1.387(5)  | C(27)-H(27)  | 0.9500    |
| O(10)-C(36)  | 1.140(5)  | C(27)-C(28)  | 1.380(6)  |
| O(11)-C(37)  | 1.148(5)  | C(28)-H(28)  | 0.9500    |
| O(12)-C(38)  | 1.147(5)  | C(28)-C(29)  | 1.391(6)  |
| N(4)-C(21)   | 1.540(5)  | C(29)-H(29)  | 0.9500    |
| N(4)-C(23)   | 1.500(4)  | C(29)-C(30)  | 1.382(6)  |
| N(4)-C(25)   | 1.525(5)  | C(30)-H(30)  | 0.9500    |
| N(5)-C(26)   | 1.342(5)  | C(31)-C(32)  | 1.380(5)  |
| N(5)-C(30)   | 1.349(5)  | C(32)-H(32)  | 0.9500    |
| N(6)-C(31)   | 1.350(5)  | C(32)-C(33)  | 1.387(6)  |
| N(6)-C(35)   | 1.338(5)  | C(33)-H(33)  | 0.9500    |
| C(20)-H(20A) | 0.9900    | C(33)-C(34)  | 1.387(6)  |
| C(20)-H(20B) | 0.9900    | C(34)-H(34)  | 0.9500    |
| C(20)-C(21)  | 1.539(6)  | C(34)-C(35)  | 1.388(5)  |
| C(21)-C(22)  | 1.517(6)  | C(35)-H(35)  | 0.9500    |



|             |          |                   |            |
|-------------|----------|-------------------|------------|
| O(4)-C(17)  | 1.153(5) | C(1)-H(1A)        | 0.9900     |
| O(6)-C(19)  | 1.148(5) | C(1)-H(1B)        | 0.9900     |
| O(5)-C(18)  | 1.153(5) | C(1)-C(2)         | 1.520(5)   |
| O(1)-C(1)   | 1.383(4) | C(15)-H(15)       | 0.9500     |
| O(2)-C(3)   | 1.449(4) | C(15)-C(16)       | 1.380(6)   |
| O(2)-C(4)   | 1.430(4) | C(2)-C(3)         | 1.535(5)   |
| O(3)-C(5)   | 1.437(4) | C(3)-H(3A)        | 0.9900     |
| O(3)-C(6)   | 1.401(4) | C(3)-H(3B)        | 0.9900     |
| N(1)-C(6)   | 1.508(4) | C(4)-H(4)         | 1.0000     |
| N(1)-C(2)   | 1.516(4) | C(16)-H(16)       | 0.9500     |
| N(1)-C(4)   | 1.482(4) | O(9A)-C(24A)      | 1.444(17)  |
| N(2)-C(7)   | 1.351(5) | C(24A)-H(24C)     | 0.9900     |
| N(2)-C(11)  | 1.347(5) | C(24A)-H(24D)     | 0.9900     |
| N(3)-C(12)  | 1.345(5) | C(22A)-H(22C)     | 0.9900     |
| N(3)-C(16)  | 1.335(5) | C(22A)-H(22D)     | 0.9900     |
| C(12)-C(6)  | 1.508(5) | C(22A)-O(8A)      | 1.45(2)    |
| C(12)-C(13) | 1.384(5) | C(20A)-H(20C)     | 0.9900     |
| C(9)-H(9)   | 0.9500   | C(20A)-H(20D)     | 0.9900     |
| C(9)-C(8)   | 1.385(6) | C(20A)-O(7A)      | 1.387(17)  |
| C(9)-C(10)  | 1.385(6) | O(1)-Re(1)-N(1)   | 78.60(10)  |
| C(7)-C(8)   | 1.397(5) | O(1)-Re(1)-N(2)   | 83.71(10)  |
| C(7)-C(4)   | 1.504(5) | N(2)-Re(1)-N(1)   | 75.80(11)  |
| C(14)-H(14) | 0.9500   | C(17)-Re(1)-O(1)  | 97.53(13)  |
| C(14)-C(13) | 1.390(5) | C(17)-Re(1)-N(1)  | 172.02(13) |
| C(14)-C(15) | 1.387(6) | C(17)-Re(1)-N(2)  | 96.93(13)  |
| C(11)-H(11) | 0.9500   | C(17)-Re(1)-C(19) | 88.38(15)  |
| C(11)-C(10) | 1.391(5) | C(17)-Re(1)-C(18) | 84.83(15)  |
| C(8)-H(8)   | 0.9500   | C(19)-Re(1)-O(1)  | 92.13(13)  |
| C(10)-H(10) | 0.9500   | C(19)-Re(1)-N(1)  | 98.68(14)  |
| C(5)-H(5A)  | 0.9900   | C(19)-Re(1)-N(2)  | 173.63(14) |
| C(5)-H(5B)  | 0.9900   | C(19)-Re(1)-C(18) | 87.54(15)  |
| C(5)-C(2)   | 1.537(5) | C(18)-Re(1)-O(1)  | 177.61(13) |
| C(6)-H(6)   | 1.0000   | C(18)-Re(1)-N(1)  | 99.11(13)  |
| C(13)-H(13) | 0.9500   | C(18)-Re(1)-N(2)  | 96.41(13)  |

|                   |            |                     |           |
|-------------------|------------|---------------------|-----------|
| O(7)-Re(2)-N(4)   | 76.67(14)  | O(7)-C(20)-H(20B)   | 109.5     |
| O(7)-Re(2)-N(5)   | 79.76(15)  | O(7)-C(20)-C(21)    | 110.7(4)  |
| N(5)-Re(2)-N(4)   | 77.38(12)  | H(20A)-C(20)-H(20B) | 108.1     |
| C(36)-Re(2)-O(7)  | 95.53(17)  | C(21)-C(20)-H(20A)  | 109.5     |
| C(36)-Re(2)-N(4)  | 170.15(14) | C(21)-C(20)-H(20B)  | 109.5     |
| C(36)-Re(2)-N(5)  | 95.47(15)  | N(4)-C(21)-C(22A)   | 100.5(7)  |
| C(36)-Re(2)-C(37) | 87.65(16)  | C(20)-C(21)-N(4)    | 109.3(3)  |
| C(36)-Re(2)-O(7A) | 96.4(6)    | C(22)-C(21)-N(4)    | 103.3(3)  |
| C(37)-Re(2)-O(7)  | 172.63(16) | C(22)-C(21)-C(20)   | 113.7(4)  |
| C(37)-Re(2)-N(4)  | 99.42(13)  | C(22)-C(21)-C(24)   | 116.0(4)  |
| C(37)-Re(2)-N(5)  | 93.34(14)  | C(24)-C(21)-N(4)    | 102.7(3)  |
| C(37)-Re(2)-O(7A) | 173.6(7)   | C(24)-C(21)-C(20)   | 110.8(4)  |
| C(38)-Re(2)-O(7)  | 99.53(17)  | C(24A)-C(21)-N(4)   | 102.6(8)  |
| C(38)-Re(2)-N(4)  | 98.93(14)  | C(24A)-C(21)-C(22A) | 113.5(14) |
| C(38)-Re(2)-N(5)  | 176.31(14) | C(24A)-C(21)-C(20A) | 121.0(13) |
| C(38)-Re(2)-C(36) | 88.19(17)  | C(20A)-C(21)-N(4)   | 106.6(7)  |
| C(38)-Re(2)-C(37) | 87.20(17)  | C(20A)-C(21)-C(22A) | 110.0(12) |
| C(38)-Re(2)-O(7A) | 87.9(7)    | O(8)-C(22)-C(21)    | 103.8(4)  |
| O(7A)-Re(2)-N(4)  | 77.2(6)    | O(8)-C(22)-H(22A)   | 111.0     |
| O(7A)-Re(2)-N(5)  | 91.3(6)    | O(8)-C(22)-H(22B)   | 111.0     |
| C(20)-O(7)-Re(2)  | 109.8(3)   | C(21)-C(22)-H(22A)  | 111.0     |
| C(23)-O(8)-C(22)  | 103.6(7)   | C(21)-C(22)-H(22B)  | 111.0     |
| C(25)-O(9)-C(24)  | 101.2(4)   | H(22A)-C(22)-H(22B) | 109.0     |
| C(21)-N(4)-Re(2)  | 108.9(2)   | O(8)-C(23)-N(4)     | 105.0(3)  |
| C(23)-N(4)-Re(2)  | 110.5(2)   | O(8)-C(23)-H(23)    | 108.6     |
| C(23)-N(4)-C(21)  | 104.8(3)   | O(8)-C(23)-C(26)    | 112.5(6)  |
| C(23)-N(4)-C(25)  | 107.4(3)   | N(4)-C(23)-H(23)    | 108.6     |
| C(25)-N(4)-Re(2)  | 122.7(2)   | N(4)-C(23)-H(23A)   | 109.7     |
| C(25)-N(4)-C(21)  | 100.8(3)   | N(4)-C(23)-C(26)    | 113.3(3)  |
| C(26)-N(5)-Re(2)  | 117.1(3)   | C(26)-C(23)-H(23)   | 108.6     |
| C(26)-N(5)-C(30)  | 118.7(3)   | C(26)-C(23)-H(23A)  | 109.7     |
| C(30)-N(5)-Re(2)  | 124.1(3)   | O(8A)-C(23)-N(4)    | 110.0(10) |
| C(35)-N(6)-C(31)  | 116.7(3)   | O(8A)-C(23)-H(23A)  | 109.7     |
| O(7)-C(20)-H(20A) | 109.5      | O(8A)-C(23)-C(26)   | 104(3)    |

|                     |          |                   |          |
|---------------------|----------|-------------------|----------|
| O(9)-C(24)-C(21)    | 105.4(4) | C(32)-C(31)-C(25) | 122.9(3) |
| O(9)-C(24)-H(24A)   | 110.7    | C(31)-C(32)-H(32) | 120.8    |
| O(9)-C(24)-H(24B)   | 110.7    | C(31)-C(32)-C(33) | 118.5(4) |
| C(21)-C(24)-H(24A)  | 110.7    | C(33)-C(32)-H(32) | 120.8    |
| C(21)-C(24)-H(24B)  | 110.7    | C(32)-C(33)-H(33) | 120.5    |
| H(24A)-C(24)-H(24B) | 108.8    | C(32)-C(33)-C(34) | 119.0(4) |
| O(9)-C(25)-N(4)     | 105.1(3) | C(34)-C(33)-H(33) | 120.5    |
| O(9)-C(25)-H(25)    | 107.2    | C(33)-C(34)-H(34) | 120.8    |
| O(9)-C(25)-C(31)    | 113.9(3) | C(33)-C(34)-C(35) | 118.4(4) |
| N(4)-C(25)-H(25)    | 107.2    | C(35)-C(34)-H(34) | 120.8    |
| N(4)-C(25)-H(25A)   | 111.8    | N(6)-C(35)-C(34)  | 123.8(4) |
| C(31)-C(25)-N(4)    | 115.7(3) | N(6)-C(35)-H(35)  | 118.1    |
| C(31)-C(25)-H(25)   | 107.2    | C(34)-C(35)-H(35) | 118.1    |
| C(31)-C(25)-H(25A)  | 111.8    | O(10)-C(36)-Re(2) | 179.2(4) |
| O(9A)-C(25)-N(4)    | 96.7(11) | O(11)-C(37)-Re(2) | 179.1(3) |
| O(9A)-C(25)-H(25A)  | 111.8    | O(12)-C(38)-Re(2) | 177.1(4) |
| O(9A)-C(25)-C(31)   | 108.0(9) | C(1)-O(1)-Re(1)   | 114.5(2) |
| N(5)-C(26)-C(23)    | 118.5(3) | C(4)-O(2)-C(3)    | 109.1(3) |
| N(5)-C(26)-C(27)    | 122.1(4) | C(6)-O(3)-C(5)    | 107.9(3) |
| C(27)-C(26)-C(23)   | 119.2(3) | C(6)-N(1)-Re(1)   | 119.7(2) |
| C(26)-C(27)-H(27)   | 120.6    | C(6)-N(1)-C(2)    | 100.0(3) |
| C(28)-C(27)-C(26)   | 118.9(4) | C(2)-N(1)-Re(1)   | 108.9(2) |
| C(28)-C(27)-H(27)   | 120.6    | C(4)-N(1)-Re(1)   | 112.0(2) |
| C(27)-C(28)-H(28)   | 120.4    | C(4)-N(1)-C(6)    | 110.8(3) |
| C(27)-C(28)-C(29)   | 119.3(4) | C(4)-N(1)-C(2)    | 103.4(3) |
| C(29)-C(28)-H(28)   | 120.4    | C(7)-N(2)-Re(1)   | 117.2(2) |
| C(28)-C(29)-H(29)   | 120.7    | C(11)-N(2)-Re(1)  | 124.1(2) |
| C(30)-C(29)-C(28)   | 118.7(4) | C(11)-N(2)-C(7)   | 118.4(3) |
| C(30)-C(29)-H(29)   | 120.7    | C(16)-N(3)-C(12)  | 116.6(3) |
| N(5)-C(30)-C(29)    | 122.2(4) | N(3)-C(12)-C(6)   | 114.1(3) |
| N(5)-C(30)-H(30)    | 118.9    | N(3)-C(12)-C(13)  | 123.8(3) |
| C(29)-C(30)-H(30)   | 118.9    | C(13)-C(12)-C(6)  | 121.8(3) |
| N(6)-C(31)-C(25)    | 113.2(3) | C(8)-C(9)-H(9)    | 120.5    |
| N(6)-C(31)-C(32)    | 123.8(3) | C(10)-C(9)-H(9)   | 120.5    |

|                   |          |                     |           |
|-------------------|----------|---------------------|-----------|
| C(10)-C(9)-C(8)   | 118.9(3) | O(1)-C(1)-H(1B)     | 109.2     |
| N(2)-C(7)-C(8)    | 122.0(3) | O(1)-C(1)-C(2)      | 112.1(3)  |
| N(2)-C(7)-C(4)    | 117.0(3) | H(1A)-C(1)-H(1B)    | 107.9     |
| C(8)-C(7)-C(4)    | 120.9(3) | C(2)-C(1)-H(1A)     | 109.2     |
| C(13)-C(14)-H(14) | 120.8    | C(2)-C(1)-H(1B)     | 109.2     |
| C(15)-C(14)-H(14) | 120.8    | C(14)-C(15)-H(15)   | 120.6     |
| C(15)-C(14)-C(13) | 118.5(4) | C(16)-C(15)-C(14)   | 118.7(4)  |
| N(2)-C(11)-H(11)  | 118.8    | C(16)-C(15)-H(15)   | 120.6     |
| N(2)-C(11)-C(10)  | 122.3(4) | N(1)-C(2)-C(5)      | 101.6(3)  |
| C(10)-C(11)-H(11) | 118.8    | N(1)-C(2)-C(1)      | 109.1(3)  |
| O(4)-C(17)-Re(1)  | 176.1(3) | N(1)-C(2)-C(3)      | 103.2(3)  |
| C(9)-C(8)-C(7)    | 119.1(4) | C(1)-C(2)-C(5)      | 113.0(3)  |
| C(9)-C(8)-H(8)    | 120.5    | C(1)-C(2)-C(3)      | 112.4(3)  |
| C(7)-C(8)-H(8)    | 120.5    | C(3)-C(2)-C(5)      | 116.2(3)  |
| O(6)-C(19)-Re(1)  | 178.7(3) | O(5)-C(18)-Re(1)    | 174.9(3)  |
| C(9)-C(10)-C(11)  | 119.2(3) | O(2)-C(3)-C(2)      | 106.3(3)  |
| C(9)-C(10)-H(10)  | 120.4    | O(2)-C(3)-H(3A)     | 110.5     |
| C(11)-C(10)-H(10) | 120.4    | O(2)-C(3)-H(3B)     | 110.5     |
| O(3)-C(5)-H(5A)   | 110.5    | C(2)-C(3)-H(3A)     | 110.5     |
| O(3)-C(5)-H(5B)   | 110.5    | C(2)-C(3)-H(3B)     | 110.5     |
| O(3)-C(5)-C(2)    | 106.3(3) | H(3A)-C(3)-H(3B)    | 108.7     |
| H(5A)-C(5)-H(5B)  | 108.7    | O(2)-C(4)-N(1)      | 106.7(3)  |
| C(2)-C(5)-H(5A)   | 110.5    | O(2)-C(4)-C(7)      | 111.6(3)  |
| C(2)-C(5)-H(5B)   | 110.5    | O(2)-C(4)-H(4)      | 109.0     |
| O(3)-C(6)-N(1)    | 103.7(3) | N(1)-C(4)-C(7)      | 111.3(3)  |
| O(3)-C(6)-C(12)   | 111.8(3) | N(1)-C(4)-H(4)      | 109.0     |
| O(3)-C(6)-H(6)    | 108.2    | C(7)-C(4)-H(4)      | 109.0     |
| N(1)-C(6)-C(12)   | 116.4(3) | N(3)-C(16)-C(15)    | 123.9(4)  |
| N(1)-C(6)-H(6)    | 108.2    | N(3)-C(16)-H(16)    | 118.0     |
| C(12)-C(6)-H(6)   | 108.2    | C(15)-C(16)-H(16)   | 118.0     |
| C(12)-C(13)-C(14) | 118.3(3) | C(25)-O(9A)-C(24A)  | 108.8(15) |
| C(12)-C(13)-H(13) | 120.8    | C(21)-C(24A)-H(24C) | 111.0     |
| C(14)-C(13)-H(13) | 120.8    | C(21)-C(24A)-H(24D) | 111.0     |
| O(1)-C(1)-H(1A)   | 109.2    | O(9A)-C(24A)-C(21)  | 103.9(14) |

|                      |           |                      |           |
|----------------------|-----------|----------------------|-----------|
| O(9A)-C(24A)-H(24C)  | 111.0     | C(23)-O(8A)-C(22A)   | 108.3(17) |
| O(9A)-C(24A)-H(24D)  | 111.0     | C(21)-C(20A)-H(20C)  | 109.9     |
| H(24C)-C(24A)-H(24D) | 109.0     | C(21)-C(20A)-H(20D)  | 109.9     |
| C(21)-C(22A)-H(22C)  | 110.3     | H(20C)-C(20A)-H(20D) | 108.3     |
| C(21)-C(22A)-H(22D)  | 110.3     | O(7A)-C(20A)-C(21)   | 109.1(15) |
| H(22C)-C(22A)-H(22D) | 108.6     | O(7A)-C(20A)-H(20C)  | 109.9     |
| O(8A)-C(22A)-C(21)   | 107.1(16) | O(7A)-C(20A)-H(20D)  | 109.9     |
| O(8A)-C(22A)-H(22C)  | 110.3     | C(20A)-O(7A)-Re(2)   | 113.7(13) |
| O(8A)-C(22A)-H(22D)  | 110.3     |                      |           |

Table 4. Anisotropic displacement parameters ( $\text{\AA}^2 \times 10^3$ ) for **10**. The anisotropic displacement factor exponent takes the form:  $-2\pi^2 [ h^2 a^{*2} U_{11} + \dots + 2 h k a^* b^* U_{12} ]$

|     | U <sub>11</sub> | U <sub>22</sub> | U <sub>33</sub> | U <sub>23</sub> | U <sub>13</sub> | U <sub>12</sub> |
|-----|-----------------|-----------------|-----------------|-----------------|-----------------|-----------------|
| Re1 | 11(1)           | 9(1)            | 13(1)           | -2(1)           | -1(1)           | -1(1)           |
| Re2 | 13(1)           | 12(1)           | 15(1)           | -3(1)           | 0(1)            | 0(1)            |
| O7  | 20(2)           | 17(2)           | 20(2)           | -5(2)           | -1(1)           | -6(2)           |
| O8  | 23(2)           | 17(4)           | 11(3)           | -5(3)           | -3(2)           | 5(2)            |
| O9  | 35(2)           | 13(1)           | 8(3)            | 0(1)            | -9(2)           | -6(1)           |
| O10 | 24(2)           | 32(2)           | 24(2)           | -6(1)           | 7(1)            | 1(1)            |
| O11 | 23(1)           | 28(2)           | 23(1)           | -10(1)          | -5(1)           | -7(1)           |
| O12 | 35(2)           | 24(2)           | 30(2)           | -5(1)           | -10(1)          | 14(1)           |
| N4  | 12(1)           | 11(1)           | 15(2)           | -2(1)           | -1(1)           | 0(1)            |
| N5  | 14(1)           | 10(1)           | 22(2)           | -1(1)           | 0(1)            | -2(1)           |
| N6  | 21(2)           | 13(2)           | 23(2)           | -3(1)           | -2(1)           | -2(1)           |
| C20 | 15(2)           | 20(2)           | 19(2)           | -9(2)           | -6(2)           | -4(2)           |
| C21 | 19(2)           | 15(2)           | 14(2)           | -6(1)           | -1(1)           | -3(1)           |
| C22 | 17(2)           | 16(2)           | 15(2)           | -2(2)           | -6(2)           | -3(2)           |
| C23 | 15(2)           | 12(2)           | 12(2)           | -4(1)           | 1(1)            | 3(1)            |
| C24 | 26(3)           | 18(2)           | 19(3)           | -6(2)           | -6(2)           | -2(2)           |
| C25 | 22(2)           | 13(2)           | 16(2)           | -3(1)           | -4(1)           | -4(1)           |
| C26 | 14(2)           | 13(2)           | 17(2)           | -6(1)           | -3(1)           | -3(1)           |
| C27 | 17(2)           | 16(2)           | 17(2)           | -5(1)           | -2(1)           | 0(1)            |
| C28 | 22(2)           | 15(2)           | 19(2)           | -3(2)           | -4(2)           | -2(1)           |
| C29 | 26(2)           | 15(2)           | 22(2)           | 1(2)            | 1(2)            | -5(2)           |
| C30 | 21(2)           | 18(2)           | 20(2)           | 1(2)            | 6(2)            | -1(2)           |
| C31 | 19(2)           | 13(2)           | 14(2)           | -2(1)           | -1(1)           | -6(1)           |
| C32 | 19(2)           | 14(2)           | 25(2)           | -1(2)           | -4(2)           | -2(1)           |
| C33 | 24(2)           | 13(2)           | 26(2)           | -6(2)           | 0(2)            | -2(2)           |
| C34 | 21(2)           | 18(2)           | 20(2)           | -6(2)           | 0(2)            | -6(2)           |
| C35 | 18(2)           | 15(2)           | 24(2)           | -1(2)           | -5(2)           | -5(1)           |
| C36 | 18(2)           | 19(2)           | 25(2)           | -7(2)           | -3(2)           | -1(2)           |
| C37 | 19(2)           | 16(2)           | 15(2)           | -2(1)           | 2(1)            | 3(1)            |
| C38 | 21(2)           | 22(2)           | 17(2)           | -4(2)           | -1(2)           | 1(2)            |
| O4  | 25(1)           | 19(1)           | 12(1)           | -1(1)           | -2(1)           | -9(1)           |
| O6  | 27(2)           | 13(1)           | 30(2)           | -10(1)          | -4(1)           | 0(1)            |

|      |       |       |       |       |       |       |
|------|-------|-------|-------|-------|-------|-------|
| O5   | 16(1) | 27(2) | 27(2) | -3(1) | -7(1) | -2(1) |
| O1   | 12(1) | 19(1) | 15(1) | -3(1) | -3(1) | -2(1) |
| O2   | 22(1) | 16(1) | 13(1) | -1(1) | 0(1)  | 2(1)  |
| O3   | 15(1) | 10(1) | 28(2) | -3(1) | -4(1) | 1(1)  |
| N1   | 13(1) | 10(1) | 10(1) | 1(1)  | 2(1)  | -3(1) |
| N2   | 16(1) | 7(1)  | 14(1) | -3(1) | -3(1) | 1(1)  |
| N3   | 12(1) | 13(2) | 23(2) | -1(1) | 0(1)  | -3(1) |
| C12  | 14(2) | 14(2) | 15(2) | 0(1)  | -1(1) | -3(1) |
| C9   | 20(2) | 11(2) | 27(2) | -4(2) | -5(2) | 2(1)  |
| C7   | 13(2) | 14(2) | 17(2) | -8(1) | -2(1) | -1(1) |
| C14  | 18(2) | 17(2) | 25(2) | -5(2) | -2(2) | -7(1) |
| C11  | 18(2) | 14(2) | 16(2) | 0(1)  | -5(1) | -2(1) |
| C17  | 14(2) | 9(2)  | 22(2) | -5(1) | -6(1) | -2(1) |
| C8   | 17(2) | 14(2) | 18(2) | -8(1) | -1(1) | -2(1) |
| C19  | 12(2) | 18(2) | 19(2) | 1(2)  | -2(1) | 0(1)  |
| C10  | 17(2) | 11(2) | 22(2) | -1(1) | -3(1) | -4(1) |
| C5   | 16(2) | 12(2) | 22(2) | -3(1) | -3(1) | -1(1) |
| C6   | 12(2) | 9(2)  | 18(2) | -1(1) | 0(1)  | -3(1) |
| C13  | 17(2) | 15(2) | 18(2) | -5(1) | -1(1) | -1(1) |
| C1   | 13(2) | 17(2) | 11(2) | -2(1) | -2(1) | -2(1) |
| C15  | 14(2) | 22(2) | 22(2) | -1(2) | -1(1) | -6(1) |
| C2   | 14(2) | 11(2) | 12(2) | 1(1)  | -3(1) | 0(1)  |
| C18  | 19(2) | 11(2) | 18(2) | -1(1) | 2(2)  | -3(1) |
| C3   | 16(2) | 18(2) | 18(2) | -2(2) | 0(1)  | 1(1)  |
| C4   | 16(2) | 12(2) | 12(2) | -3(1) | -1(1) | 0(1)  |
| C16  | 15(2) | 16(2) | 22(2) | -2(2) | -2(1) | 0(1)  |
| O9A  | 37(4) | 14(3) | 8(4)  | 0(3)  | -8(4) | -6(3) |
| C24A | 26(4) | 17(4) | 17(4) | -6(3) | -7(4) | -1(4) |
| C22A | 19(4) | 16(4) | 17(4) | -2(3) | -4(3) | -2(3) |
| O8A  | 22(3) | 17(5) | 12(4) | -5(4) | -2(3) | 3(3)  |
| C20A | 16(3) | 19(3) | 17(3) | -9(3) | -5(3) | -4(3) |
| O7A  | 19(3) | 16(4) | 20(3) | -5(3) | -2(3) | -8(3) |

Table 5. Hydrogen coordinates ( $\times 10^4$ ) and isotropic displacement parameters ( $\text{\AA}^2 \times 10^3$ ) for **11**.

---

|  |   |   |   |       |
|--|---|---|---|-------|
|  | x | y | z | U(eq) |
|--|---|---|---|-------|

---

|      |       |       |       |    |
|------|-------|-------|-------|----|
| H20A | 9964  | 4107  | 2214  | 20 |
| H20B | 10085 | 2616  | 2077  | 20 |
| H22A | 7262  | 4993  | 2919  | 19 |
| H22B | 7695  | 5442  | 2016  | 19 |
| H23  | 5354  | 3508  | 1547  | 16 |
| H23A | 5335  | 3526  | 1565  | 16 |
| H24A | 8806  | 2266  | 3267  | 24 |
| H24B | 7202  | 2726  | 3416  | 24 |
| H25  | 5905  | 2177  | 2601  | 20 |
| H25A | 5999  | 2110  | 2681  | 20 |
| H27  | 4838  | 6157  | 1021  | 20 |
| H28  | 5263  | 7449  | -163  | 22 |
| H29  | 7201  | 6851  | -1018 | 26 |
| H30  | 8586  | 4940  | -689  | 25 |
| H32  | 7782  | -671  | 2033  | 23 |
| H33  | 6822  | -2165 | 1462  | 25 |
| H34  | 4751  | -1495 | 955   | 23 |
| H35  | 3704  | 603   | 1054  | 23 |
| H9   | 7435  | 7949  | 7033  | 23 |
| H14  | 3870  | -328  | 5607  | 23 |
| H11  | 8491  | 6262  | 5080  | 19 |
| H8   | 6769  | 5972  | 7668  | 19 |
| H10  | 8282  | 8090  | 5717  | 20 |
| H5A  | 9590  | 568   | 6554  | 20 |
| H5B  | 9078  | 195   | 7454  | 20 |
| H6   | 6278  | 1431  | 7464  | 16 |
| H13  | 5954  | -282  | 6075  | 20 |
| H1A  | 9624  | 3804  | 6829  | 16 |
| H1B  | 10634 | 2480  | 6866  | 16 |
| H15  | 2190  | 1469  | 5713  | 23 |
| H3A  | 7925  | 1699  | 8252  | 21 |
| H3B  | 8873  | 2848  | 8108  | 21 |
| H4   | 5696  | 3831  | 7064  | 16 |
| H16  | 2639  | 3216  | 6257  | 21 |



|      |      |      |      |    |
|------|------|------|------|----|
| H24C | 9532 | 2048 | 2763 | 24 |
| H24D | 8211 | 2336 | 3377 | 24 |
| H22C | 6433 | 3849 | 3171 | 20 |
| H22D | 7237 | 5081 | 2864 | 20 |
| H20C | 8617 | 5031 | 1543 | 19 |
| H20D | 9681 | 4543 | 2153 | 19 |

---

Table 6. Torsion angles [°] for **10**.

|                 |           |                  |           |
|-----------------|-----------|------------------|-----------|
| Re1-O1-C1-C2    | 39.1(3)   | N4-C21-C22-O8    | 26.5(6)   |
| Re1-N1-C6-O3    | 73.1(3)   | N4-C21-C24-O9    | 20.9(5)   |
| Re1-N1-C6-C12   | -50.1(4)  | N4-C21-C24A-O9A  | -6(2)     |
| Re1-N1-C2-C5    | -89.1(3)  | N4-C21-C22A-O8A  | -29(4)    |
| Re1-N1-C2-C1    | 30.5(3)   | N4-C21-C20A-O7A  | -53.1(17) |
| Re1-N1-C2-C3    | 150.2(2)  | N4-C23-C26-N5    | 14.2(5)   |
| Re1-N1-C4-O2    | -150.4(2) | N4-C23-C26-C27   | -169.7(3) |
| Re1-N1-C4-C7    | -28.3(3)  | N4-C23-O8A-C22A  | -1(6)     |
| Re1-N2-C7-C8    | 173.3(3)  | N4-C25-C31-N6    | -77.2(4)  |
| Re1-N2-C7-C4    | -9.6(4)   | N4-C25-C31-C32   | 106.2(4)  |
| Re1-N2-C11-C10  | -174.5(3) | N4-C25-O9A-C24A  | 49(2)     |
| Re2-O7-C20-C21  | -56.3(4)  | N5-C26-C27-C28   | -1.7(6)   |
| Re2-N4-C21-C20  | -4.4(4)   | N6-C31-C32-C33   | -0.2(6)   |
| Re2-N4-C21-C22  | 116.9(3)  | C20-C21-C22-O8   | 144.8(6)  |
| Re2-N4-C21-C24  | -122.1(3) | C20-C21-C24-O9   | -95.7(4)  |
| Re2-N4-C21-C24A | -96.6(12) | C21-N4-C23-O8    | -25.2(8)  |
| Re2-N4-C21-C22A | 146.3(10) | C21-N4-C23-C26   | 97.9(3)   |
| Re2-N4-C21-C20A | 31.5(9)   | C21-N4-C23-O8A   | -18(4)    |
| Re2-N4-C23-O8   | -142.3(7) | C21-N4-C25-O9    | -36.3(4)  |
| Re2-N4-C23-C26  | -19.3(3)  | C21-N4-C25-C31   | -162.8(3) |
| Re2-N4-C23-O8A  | -135(4)   | C21-N4-C25-O9A   | -49.1(11) |
| Re2-N4-C25-O9   | 84.7(3)   | C21-C22A-O8A-C23 | 20(6)     |
| Re2-N4-C25-C31  | -41.8(4)  | C21-C20A-O7A-Re2 | 50(2)     |
| Re2-N4-C25-O9A  | 71.9(11)  | C22-O8-C23-N4    | 42.7(9)   |
| Re2-N5-C26-C23  | -1.0(4)   | C22-O8-C23-C26   | -80.9(7)  |
| Re2-N5-C26-C27  | -177.0(3) | C22-C21-C24-O9   | 132.7(4)  |
| Re2-N5-C30-C29  | 177.9(3)  | C23-O8-C22-C21   | -43.4(9)  |
| O7-C20-C21-N4   | 38.2(5)   | C23-N4-C21-C20   | -122.7(3) |
| O7-C20-C21-C22  | -76.5(5)  | C23-N4-C21-C22   | -1.4(4)   |
| O7-C20-C21-C24  | 150.6(4)  | C23-N4-C21-C24   | 119.6(3)  |
| O8-C23-C26-N5   | 133.0(5)  | C23-N4-C21-C24A  | 145.1(12) |
| O8-C23-C26-C27  | -50.8(6)  | C23-N4-C21-C22A  | 28.0(10)  |
| O9-C25-C31-N6   | 160.9(4)  | C23-N4-C21-C20A  | -86.7(9)  |
| O9-C25-C31-C32  | -15.8(6)  | C23-N4-C25-O9    | -145.7(3) |

|                  |            |                 |           |
|------------------|------------|-----------------|-----------|
| C23-N4-C25-C31   | 87.7(4)    | O3-C5-C2-C1     | -134.5(3) |
| C23-N4-C25-O9A   | -158.6(10) | O3-C5-C2-C3     | 93.3(4)   |
| C23-C26-C27-C28  | -177.7(3)  | N1-C2-C3-O2     | -18.4(4)  |
| C24-O9-C25-N4    | 50.7(4)    | N2-C7-C8-C9     | 1.7(6)    |
| C24-O9-C25-C31   | 178.4(4)   | N2-C7-C4-O2     | 144.6(3)  |
| C24-C21-C22-O8   | -85.0(6)   | N2-C7-C4-N1     | 25.4(4)   |
| C25-O9-C24-C21   | -44.4(5)   | N2-C11-C10-C9   | 1.6(6)    |
| C25-N4-C21-C20   | 125.9(3)   | N3-C12-C6-O3    | -176.8(3) |
| C25-N4-C21-C22   | -112.8(3)  | N3-C12-C6-N1    | -57.9(4)  |
| C25-N4-C21-C24   | 8.2(4)     | N3-C12-C13-C14  | -1.9(6)   |
| C25-N4-C21-C24A  | 33.7(12)   | C12-N3-C16-C15  | 3.5(6)    |
| C25-N4-C21-C22A  | -83.4(10)  | C7-N2-C11-C10   | -0.7(5)   |
| C25-N4-C21-C20A  | 161.9(9)   | C14-C15-C16-N3  | -3.1(6)   |
| C25-N4-C23-O8    | 81.5(7)    | C11-N2-C7-C8    | -0.9(5)   |
| C25-N4-C23-C26   | -155.4(3)  | C11-N2-C7-C4    | 176.2(3)  |
| C25-N4-C23-O8A   | 88(4)      | C8-C9-C10-C11   | -0.8(6)   |
| C25-C31-C32-C33  | 176.1(4)   | C8-C7-C4-O2     | -38.2(5)  |
| C25-O9A-C24A-C21 | -28(3)     | C8-C7-C4-N1     | -157.4(3) |
| C26-N5-C30-C29   | -2.4(6)    | C10-C9-C8-C7    | -0.7(6)   |
| C26-C23-O8A-C22A | -123(5)    | C5-O3-C6-N1     | 35.5(4)   |
| C26-C27-C28-C29  | -0.9(6)    | C5-O3-C6-C12    | 161.6(3)  |
| C27-C28-C29-C30  | 1.8(6)     | C5-C2-C3-O2     | -128.6(3) |
| C28-C29-C30-N5   | -0.1(6)    | C6-O3-C5-C2     | -10.7(4)  |
| C30-N5-C26-C23   | 179.3(3)   | C6-N1-C2-C5     | 37.2(3)   |
| C30-N5-C26-C27   | 3.3(5)     | C6-N1-C2-C1     | 156.8(3)  |
| C31-N6-C35-C34   | 1.5(6)     | C6-N1-C2-C3     | -83.5(3)  |
| C31-C25-O9A-C24A | 168.5(17)  | C6-N1-C4-O2     | 73.2(3)   |
| C31-C32-C33-C34  | 1.0(6)     | C6-N1-C4-C7     | -164.8(3) |
| C32-C33-C34-C35  | -0.7(6)    | C6-C12-C13-C14  | 171.6(3)  |
| C33-C34-C35-N6   | -0.7(6)    | C13-C12-C6-O3   | 9.1(5)    |
| C35-N6-C31-C25   | -177.7(3)  | C13-C12-C6-N1   | 128.0(4)  |
| C35-N6-C31-C32   | -1.1(6)    | C13-C14-C15-C16 | 0.1(6)    |
| O1-C1-C2-N1      | -46.1(4)   | C1-C2-C3-O2     | 99.0(3)   |
| O1-C1-C2-C5      | 66.1(4)    | C15-C14-C13-C12 | 2.2(6)    |
| O1-C1-C2-C3      | -160.0(3)  | C2-N1-C6-O3     | -45.6(3)  |
| O3-C5-C2-N1      | -17.9(4)   | C2-N1-C6-C12    | -168.8(3) |

|                   |            |
|-------------------|------------|
| C2-N1-C4-O2       | -33.2(3)   |
| C2-N1-C4-C7       | 88.8(3)    |
| C3-O2-C4-N1       | 22.1(4)    |
| C3-O2-C4-C7       | -99.7(3)   |
| C4-O2-C3-C2       | -1.8(4)    |
| C4-N1-C6-O3       | -154.2(3)  |
| C4-N1-C6-C12      | 82.6(4)    |
| C4-N1-C2-C5       | 151.6(3)   |
| C4-N1-C2-C1       | -88.8(3)   |
| C4-N1-C2-C3       | 30.9(3)    |
| C4-C7-C8-C9       | -175.4(3)  |
| C16-N3-C12-C6     | -174.8(3)  |
| C16-N3-C12-C13    | -0.9(6)    |
| O9A-C25-C31-N6    | 175.8(13)  |
| O9A-C25-C31-C32   | -0.9(13)   |
| C24A-C21-C22A-O8A | -138(4)    |
| C24A-C21-C20A-O7A | 63(2)      |
| C22A-C21-C24A-O9A | 102(2)     |
| C22A-C21-C20A-O7A | -161.2(15) |
| O8A-C23-C26-N5    | 133.7(18)  |
| O8A-C23-C26-C27   | -50.1(18)  |
| C20A-C21-C24A-O9A | -124.1(18) |
| C20A-C21-C22A-O8A | 83(4)      |
